# Supplementary material for: [3-N2-o-C2B10H11][BF4]: a useful synthon for multiple cage boron functionalizations of o-carborane
Source: PubMed Central journal article supplement (PMC6022115; doi:10.1039/c6sc01566b), 2016-06-08

## Electronic Supplementary Information

### **[3-N<sub>2</sub>-*o*-C<sub>2</sub>B<sub>10</sub>H<sub>11</sub>][BF<sub>4</sub>]: A Useful Synthone for Multiple Cage Boron Functionalization of *o*-Carborane**

*Da Zhao and Zuowei Xie\**

Department of Chemistry and State Key Laboratory of Synthetic Chemistry, The Chinese University of

Hong Kong, Shatin, New Territories, Hong Kong, China

#### Table of Contents

|                                                                                                           |     |
|-----------------------------------------------------------------------------------------------------------|-----|
| General Information                                                                                       | S2  |
| Synthesis of starting materials                                                                           | S2  |
| General procedure for the reaction of carboranyl diazonium salt <b>1</b> with representative nucleophiles | S4  |
| General procedure for the reaction of carboranyl diazonium salt <b>1</b> with other nucleophiles          | S6  |
| A 0.5 mmol scale reaction of carboranyl diazonium salt <b>1</b> with CsF                                  | S12 |
| Reaction of carboranyl diazonium salt <b>1</b> with ethers                                                | S13 |
| Formation of HBF <sub>4</sub> in the reaction of carboranyl diazonium salt <b>1</b> with methanol         | S15 |
| Proof-of-concept synthesis of 3-fluoro- <i>o</i> -carborane under reported reaction conditions            | S16 |
| References                                                                                                | S17 |
| NMR Spectra                                                                                               | S18 |

## General Information.

All reactions were carried out under an atmosphere of dry argon with the rigid exclusion of air and moisture in a glovebox unless otherwise specified.  $^1\text{H}$  and  $^{13}\text{C}$  NMR spectra were recorded on a Bruker DPX 400 spectrometer at 400 and 100 MHz, respectively.  $^{11}\text{B}$  NMR spectra were recorded on a Bruker DPX 300 spectrometer at 96 MHz or a Varian Inova 400 spectrometer at 128 MHz.  $^{31}\text{P}$  NMR spectra were recorded on a Bruker DPX 300 spectrometer at 162 MHz. All signals were reported in ppm with reference to the residual solvent resonances of the deuterated solvents for proton and carbon chemical shifts, to external  $\text{BF}_3\cdot\text{OEt}_2$  (0.00 ppm) for boron chemical shifts, to external 85%  $\text{H}_3\text{PO}_4$  (0.00 ppm) for phosphorus chemical shifts, and to external  $\text{CFCl}_3$  (0.00 ppm) for fluorine chemical shifts. The data were reported as follows: chemical shift, multiplicity (s = singlet, d = doublet, t = triplet, q = quadruplet, m = multiplet or unresolved, br = broad), coupling constant(s) in Hz, integration, and assignment. Mass spectra were obtained on a Thermo Finnigan MAT 95 XL spectrometer or Waters Micromass GCT Premier. The thermal property was investigated with TA Instruments (model Q1000) at a heating rate of 5  $^\circ\text{C}/\text{min}$  (Purge flow: 50mL/min under  $\text{N}_2$ ). All organic solvents were freshly distilled from Na-K alloy or  $\text{CaH}_2$  immediately prior to use. 3-Diazonium-*o*-carborane tetrafluoroborate was prepared according to literature method.<sup>1</sup> All other chemicals were purchased from either Aldrich or Acros Chemical Co. and used as received unless otherwise specified.

## Synthesis of starting materials

**Preparation of 3-amino-*o*-carborane.** A 250 mL three-neck round-bottom flask was charged with *o*-carborane ( $o\text{-C}_2\text{B}_{10}\text{H}_{12}$ , 5.0 g, 34.7 mmol) and a stir bar under argon atmosphere. Liquid ammonia (150 mL) was collected in the same flask using a dry ice-acetone ammonia condenser. At  $-78\text{ }^\circ\text{C}$ , finely cut sodium metal (1.68 g, 72.5 mmol) was added slowly over 30 min through a side arm using a protective blast shield. At the end of the addition of the sodium metal, the ammonia solution turned into a deep blue due to excess sodium metal. The reaction mixture was then allowed to stir at  $-40\text{ }^\circ\text{C}$  for 1.5 h (do not

lower the temperature to  $-50\text{ }^{\circ}\text{C}$  or below. Otherwise, the *nido*- $\text{C}_2\text{B}_{10}\text{H}_{12}$  reacts very slowly with liquid ammonia). Then the reaction mixture was cooled to  $-78\text{ }^{\circ}\text{C}$  and potassium permanganate (12.0 g, 72.5 mmol) was slowly added over 30 min through the side arm using a protective blast shield. The reaction mixture was allowed to stir for another 2 h at  $-78\text{ }^{\circ}\text{C}$ . *tert*-Butyl alcohol (10 mL) was then slowly added with caution at  $-78\text{ }^{\circ}\text{C}$ , followed by 50% aqueous *tert*-butyl alcohol (20 mL) to destroy excess sodium in the reaction mixture. After that, ethyl acetate (30 mL) and water (30 mL) were slowly added in sequence. The reaction was allowed to warm up slowly to room temperature, during which ammonia was evaporated. The reaction mixture was filtered through a Buchner funnel to remove  $\text{MnO}_2$  and washed with ethyl acetate (2 x 30 mL). The organic layers were separated and dried over sodium sulfate. After removal of solvents in vacuo, the residue was subjected to flash column chromatography on silica gel (230-400 mesh) using *n*-hexane/EtOAc (50/1 to 10/1 in V/V) as eluent to give 3-amino-*o*-carborane as a white solid (4.8 g, 88%). (**CAUTION:** This reaction is potentially explosive and should be carried out with protection).

**Preparation of 3-diazonium-*o*-carborane tetrafluoroborate (1).** To an anhydrous acetonitrile solution (1.5 mL) of 3-amino-*o*-carborane (318.0 mg, 2.0 mmol) was added  $\text{NOBF}_4$  (323.5 mg, 3.0 mmol) at  $-30\text{ }^{\circ}\text{C}$  and the reaction mixture was stirred at  $-15\text{ }^{\circ}\text{C}$  for 1.5 h. Dry ether (10 mL) was then added at  $-30\text{ }^{\circ}\text{C}$  to the reaction mixture, from which **1** was precipitated out. Solvent was transferred via a cannula and the remaining solid was further washed by dry ether (2 mL  $\times$  2). After removal of ether via a cannula, the crystalline solid was dried under vacuum to give **1** as a white solid (402.5 mg, 78%). (**CAUTION:** Although spontaneous detonate or explosion has not been observed in our laboratory upon synthesizing or handling the dry diazonium salt **1**, we recommend to handle this compound with care). Compound **1** displayed DSC exotherm at  $\sim 104.9\text{ }^{\circ}\text{C}$  as depicted in Figure S1. IR (KBr,  $\text{cm}^{-1}$ ): 3067 (cage CH), 2645, 2617, 2592 (cage BH), 2357 ( $\text{N}_2$ ).

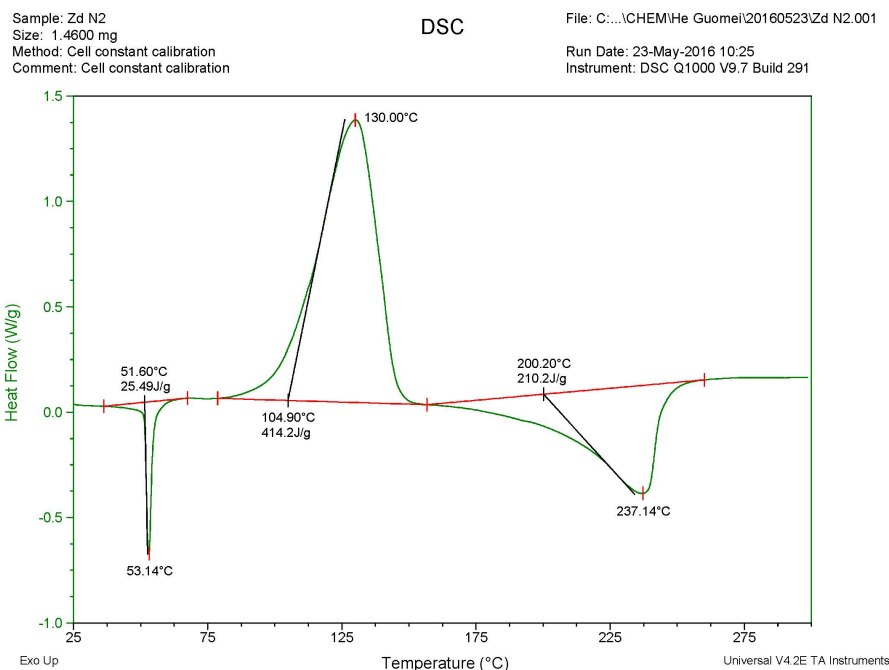

**Figure S1.** Thermal property of 3-diazonium salt **1** tested by differential scanning calorimeter (TA Instruments, model Q1000); Headspace gas: nitrogen (50 mL/min), temperature range: 25 to 800 °C, temperature rate: 5 °C/min). The exothermic peak at 130.0 °C can be assigned to the decomposition process of **1**. It is not clear what process is related to the first endothermic peak at 53.1 °C. The second endothermic peak at 237.1 °C corresponds to the sublimation process of 3-F-*o*-carborane (generated by thermal decomposition of **1**).

**General procedure for the reaction of carboranyl diazonium salt **1** with representative nucleophiles such as CsF, LiCl, MeOH, and H<sub>2</sub>O** (Table 1, entries 1 and 15). 3-Diazonium-*o*-carborane tetrafluoroborate (**1**; 25.8 mg, 0.1 mmol) and nucleophiles (0.1 or 1.0 mmol) were dissolved in dry CH<sub>3</sub>CN (2 mL) in an open 10 mL Schlenk flask equipped with a magnetic stirring bar. In all cases, bubbles were immediately observed after the nucleophile was added. Under an atmosphere of dry argon, the reaction mixture was further stirred at room temperature for 5 min. Then the reaction was stopped and the resulting mixture was examined by GC-MS analysis. After removal of solvents in vacuo, the residue was examined by <sup>1</sup>H NMR spectrum and then subjected to flash column chromatography on Al<sub>2</sub>O<sub>3</sub> (activated, neutral,

Merck, 70-230 mesh mesh) using *n*-hexane/EtOAc (100/1 in v/v) as eluent to give the desired product.

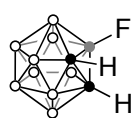 **3a:** White solid. Yield: 98%.  $^1\text{H}$  NMR (400 MHz,  $\text{CDCl}_3$ ):  $\delta$  3.76 (br, 2H) (cage CH).  $^{19}\text{F}\{^1\text{H}\}$  NMR (376 MHz,  $\text{CDCl}_3$ ):  $\delta$  -201.1 (q,  $J_{\text{F-B}} = 56.4$  Hz).  $^{11}\text{B}\{^1\text{H}\}$  NMR (128 MHz,  $\text{CDCl}_3$ ):  $\delta$  -1.1 (1B), -5.5 (2B), -12.7 (1B), -15.2 (3B), -16.5 (2B), -20.0 (1B). The chemical shifts are in accordance with the reported data.<sup>2</sup>

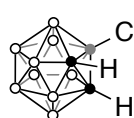 **3b:** White solid. Yield: 95%.  $^1\text{H}$  NMR (400 MHz,  $\text{CDCl}_3$ ):  $\delta$  3.81 (br, 2H) (cage CH). The chemical shifts are in accordance with the reported data.<sup>2</sup>

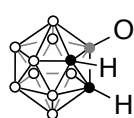 **17a:** White solid. Yield: 81%.  $^1\text{H}$  NMR (400 MHz,  $\text{CDCl}_3$ ):  $\delta$  3.69 (s, 3H) ( $\text{CH}_3$ ), 3.56 (br, 2H) (cage CH).  $^{13}\text{C}\{^1\text{H}\}$  NMR (100 MHz,  $\text{CDCl}_3$ ):  $\delta$  57.4 (cage C), 55.9.  $^{11}\text{B}\{^1\text{H}\}$  NMR (128 MHz,  $\text{CDCl}_3$ ):  $\delta$  1.3 (1B), -5.4 (2B), -13.1 (1B), -15.0 (3B), -16.1 (2B), -19.9 (1B). HRMS (EI) calcd for  $\text{C}_3\text{H}_{14}^{11}\text{B}_8^{10}\text{B}_2\text{O}^+$ : 174.0841. Found 174.0837.

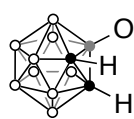 **17g:** Colorless oil. Yield: quant.  $^1\text{H}$  NMR (400 MHz,  $\text{CDCl}_3$ ):  $\delta$  4.43 (br, 2H) (cage CH). The chemical shifts are in accordance with the reported data.<sup>3</sup>

**For the reaction of 1 with acetonitrile** (Table 1, entry 17). Under an atmosphere of dry argon, a dry  $\text{CH}_3\text{CN}$  (2 mL) solution of 3-diazonium-*o*-carborane tetrafluoroborate (**1**; 25.8 mg, 0.1 mmol) in a 10 mL Schlenk flask was stirred at indicated temperatures (room temperature for 48 h or 50 °C for 6 h). Then the reaction was stopped and the resulting mixture was examined by GC-MS analysis. After removal of solvents in vacuo, the residue was examined by  $^1\text{H}$  NMR spectrum and then subjected to flash column chromatography on  $\text{Al}_2\text{O}_3$  (activated, neutral, Merck, 70-230 mesh mesh) using *n*-hexane/EtOAc (100/1 in v/v) as eluent to give the hydrolysis product **19a** as a colorless oil (eq S1).

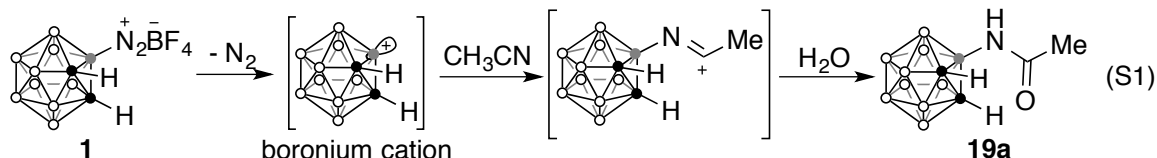

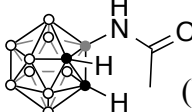
**19a:** Colorless oil. Yield: 91%.  $^1\text{H}$  NMR (400 MHz,  $\text{CD}_2\text{Cl}_2$ ):  $\delta$  5.78 (br, 1H) (NH), 4.48 (br, 2H), (cage CH), 2.04 (s, 3H) ( $\text{CH}_3$ ).  $^{13}\text{C}\{^1\text{H}\}$  NMR (100 MHz,  $\text{CD}_2\text{Cl}_2$ ):  $\delta$  175.0, 55.6 (cage C), 25.1.  $^{11}\text{B}\{^1\text{H}\}$  NMR (128 MHz,  $\text{CD}_2\text{Cl}_2$ ):  $\delta$  -3.0 (2B), -4.3 (1B), -10.2 (1B), -13.4 (2B), -14.1 (4B). HRMS (EI) calcd for  $\text{C}_4\text{H}_{15}^{11}\text{B}_8^{10}\text{B}_2\text{NO}^+$ : 201.1094. Found 201.1095.

### General procedure for reaction of carboranyl diazonium salt **1** with other nucleophiles.

3-Diazonium-*o*-carborane tetrafluoroborate (**1**; 25.8 mg, 0.1 mmol) and nucleophiles (0.1 mmol for inorganic salt and phosphine oxide; 1.0 mmol for alcohol, acid and ketone; 0.4 mmol for Grignard agent and lithium amide; nitriles were utilized as solvent) were dissolved in 2 mL dry  $\text{CH}_3\text{CN}$  (THF for Grignard agents and lithium amides) in an open 10 mL Schlenk flask equipped with a magnetic stirring bar. Under an atmosphere of dry argon, the reaction mixture was further stirred at room temperature (-78 °C for Grignard agents and lithium amides, 50 °C for nitriles) for 5 min (15min for Grignard agents and lithium amides, 6 h for nitriles). Then the reaction was stopped and the resulting mixture was examined by GC-MS analysis. After removal of solvents in vacuo, the residue was examined by  $^1\text{H}$  NMR spectrum and then subjected to flash column chromatography on  $\text{Al}_2\text{O}_3$  (activated, neutral, Merck, 70-230 mesh mesh) using *n*-hexane/EtOAc (100/1 in v/v) as eluent to give the desired product.

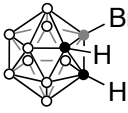
**3c:** White solid. Yield: 87%.  $^1\text{H}$  NMR (400 MHz,  $\text{CDCl}_3$ ):  $\delta$  3.84 (br, 2H) (cage CH). The chemical shifts are in accordance with the reported data.<sup>4</sup>

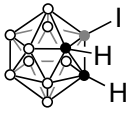
**3d:** White solid. Yield: 95%.  $^1\text{H}$  NMR (400 MHz,  $\text{CD}_2\text{Cl}_2$ ):  $\delta$  3.84 (br, 2H) (cage CH). The

chemical shifts are in accordance with the reported data.<sup>5</sup>

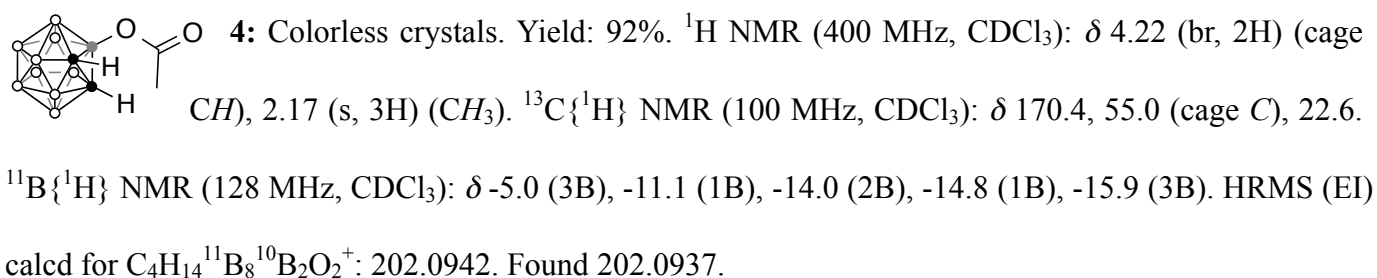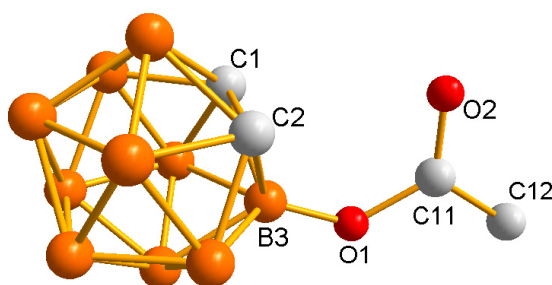

**Figure S2.** Molecular Structure of **4**.

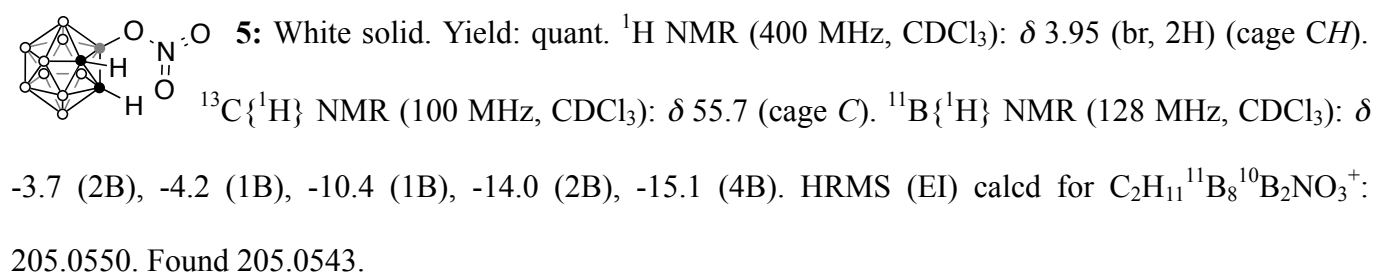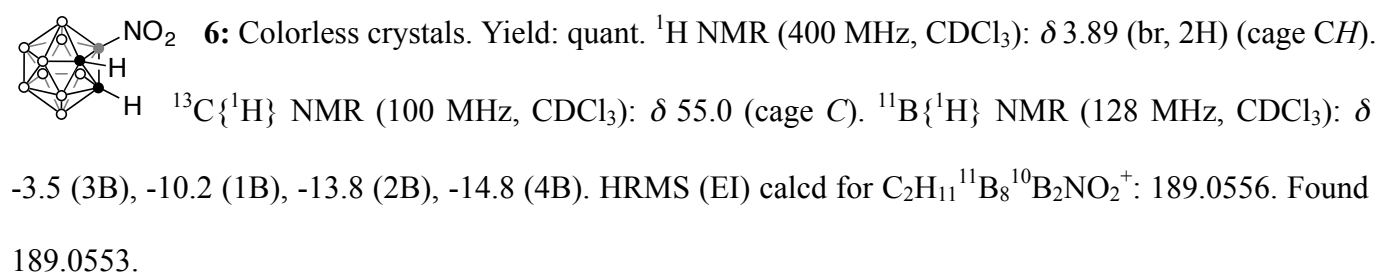

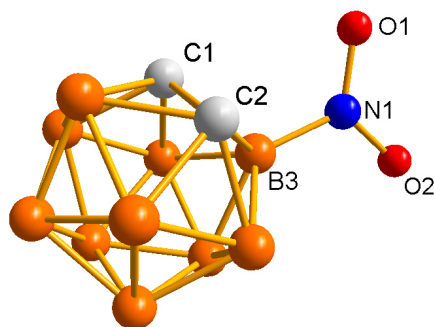

**Figure S3.** Molecular Structure of **6**.


**7:** White solid. Yield: quant.  $^1\text{H}$  NMR (400 MHz,  $\text{CDCl}_3$ ):  $\delta$  3.61 (br, 2H) (cage CH).  $^{13}\text{C}\{^1\text{H}\}$  NMR (100 MHz,  $\text{CDCl}_3$ ):  $\delta$  56.0 (cage C).  $^{11}\text{B}\{^1\text{H}\}$  NMR (128 MHz,  $\text{CDCl}_3$ ):  $\delta$  -3.8 (2B), -5.1 (1B), -11.1 (1B), -14.2 (4B), -14.9 (2B). HRMS (EI) calcd for  $\text{C}_2\text{H}_{11}^{11}\text{B}_8^{10}\text{B}_2\text{N}_3^+$ : 185.0702. Found 185.0701. IR (KBr,  $\text{cm}^{-1}$ ): 3066 (cage CH), 2574 (cage BH), 2149 ( $\text{N}_3$ ).


**8:** White solid. Yield: 76%.  $^1\text{H}$  NMR (400 MHz,  $\text{CDCl}_3$ ):  $\delta$  4.21 (br, 2H) (cage CH). The chemical shifts are in accordance with the reported data.<sup>6</sup>


**9:** Colorless oil. Yield: 43%.  $^1\text{H}$  NMR (400 MHz, acetone- $d_6$ ):  $\delta$  4.88 (br, 2H) (cage CH), 4.72 (br, 2H) (OH).  $^{13}\text{C}\{^1\text{H}\}$  NMR (100 MHz, acetone- $d_6$ ):  $\delta$  58.5 (cage C).  $^{11}\text{B}\{^1\text{H}\}$  NMR (128 MHz, acetone- $d_6$ ):  $\delta$  -2.8 (1B), -5.0 (2B), -11.0 (1B), -13.8 (2B), -15.0 (3B), -16.3 (1B). HRMS (EI) calcd for  $\text{C}_2\text{H}_{13}^{11}\text{B}_8^{10}\text{B}_2\text{PO}_4^+$ : 240.0374. Found 240.0371.


**10:** Colorless oil. Yield: 73%.  $^1\text{H}$  NMR (400 MHz,  $\text{CDCl}_3$ ):  $\delta$  4.21 (br, 2H) (cage CH).  $^{13}\text{C}\{^1\text{H}\}$  NMR (100 MHz,  $\text{CDCl}_3$ ):  $\delta$  58.8 (cage C).  $^{11}\text{B}\{^1\text{H}\}$  NMR (128 MHz,  $\text{CDCl}_3$ ):  $\delta$  0.7 (1B), -3.5 (2B), -10.7 (1B), -13.1 (2B), -14.4 (3B), -17.6 (1B). HRMS (EI) calcd for  $\text{C}_2\text{H}_{12}^{11}\text{B}_8^{10}\text{B}_2\text{SO}_3^+$ : 224.1210. Found 224.1203.



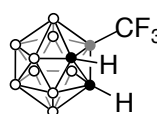
**11:** White solid. Yield: 73%.  $^1\text{H}$  NMR (400 MHz,  $\text{CDCl}_3$ ):  $\delta$  3.91 (br, 2H) (cage CH).  $^{13}\text{C}\{^1\text{H}\}$  NMR (100 MHz,  $\text{CDCl}_3$ ):  $\delta$  58.8 (cage C), the C connected to the cage B atom was not observed.  $^{11}\text{B}\{^1\text{H}\}$  NMR (128 MHz,  $\text{CDCl}_3$ ):  $\delta$  1.0 (1B), -3.3 (2B), -10.4 (1B), -12.9 (2B), -14.1 (3B), -17.3 (1B). HRMS (EI) calcd for  $\text{C}_3\text{H}_{11}^{11}\text{B}_8^{10}\text{B}_2\text{F}_3^+$ : 212.0560. Found 212.0554.

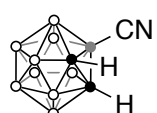
**12:** Colorless oil. Yield: 94%.  $^1\text{H}$  NMR (400 MHz,  $\text{CDCl}_3$ ):  $\delta$  3.54 (br, 2H) (cage CH).  $^{13}\text{C}\{^1\text{H}\}$  NMR (100 MHz,  $\text{CDCl}_3$ ):  $\delta$  53.9 (cage C), the C connected to the cage B atom was not observed.  $^{11}\text{B}\{^1\text{H}\}$  NMR (128 MHz,  $\text{CDCl}_3$ ):  $\delta$  -0.9 (1B), -5.2 (2B), -12.4 (1B), -14.8 (2B), -16.1 (3B), -19.3 (1B). HRMS (EI) calcd for  $\text{C}_3\text{H}_{11}^{11}\text{B}_8^{10}\text{B}_2\text{N}^+$ : 169.0675. Found 169.0678.

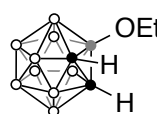
**13:** Colorless oil. Yield: 76%.  $^1\text{H}$  NMR (400 MHz,  $\text{CDCl}_3$ ):  $\delta$  3.96 (q,  $J = 7.2$  Hz, 2H), 3.56 (br, 2H) (cage CH), 1.29 (t,  $J = 7.2$  Hz, 3H).  $^{13}\text{C}\{^1\text{H}\}$  NMR (100 MHz,  $\text{CDCl}_3$ ):  $\delta$  66.0, 56.0 (cage C), 17.0.  $^{11}\text{B}\{^1\text{H}\}$  NMR (128 MHz,  $\text{CDCl}_3$ ):  $\delta$  0.98 (1B), -5.5 (2B), -13.0 (1B), -14.8 (2B), -15.5 (1B), -16.1 (2B), -20.0 (1B). HRMS (EI) calcd for  $\text{C}_4\text{H}_{16}^{11}\text{B}_8^{10}\text{B}_2\text{O}^+$ : 188.1107. Found 188.1105.

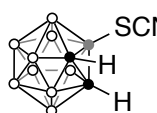
**14:** White solid. Yield: 92%.  $^1\text{H}$  NMR (400 MHz,  $\text{CDCl}_3$ ):  $\delta$  3.77 (br, 2H) (cage CH).  $^{13}\text{C}\{^1\text{H}\}$  NMR (100 MHz,  $\text{CDCl}_3$ ):  $\delta$  118.7, 56.7 (cage C).  $^{11}\text{B}\{^1\text{H}\}$  NMR (128 MHz,  $\text{CDCl}_3$ ):  $\delta$  -3.78 (2B), -10.3 (1B), -12.0 (1B), -13.9 (2B), -15.0 (4B). HRMS (EI) calcd for  $\text{C}_3\text{H}_{11}^{11}\text{B}_8^{10}\text{B}_2\text{SN}^+$ : 201.1323. Found 201.1319.

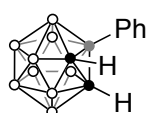
**15a:** White solid. Yield: 78%.  $^1\text{H}$  NMR (400 MHz,  $\text{CDCl}_3$ ):  $\delta$  8.01-7.31 (m, 5H) (aromatic CH), 3.71 (br, 2H) (cage CH). The chemical shifts are in accordance with the reported data.<sup>7</sup>

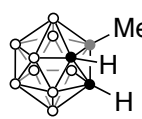
**15b:** White solid. Yield: 81%.  $^1\text{H}$  NMR (400 MHz,  $\text{CDCl}_3$ ):  $\delta$  4.03 (br, 2H) (cage CH), 2.09 (s, 3H) ( $\text{CH}_3$ ).  $^{13}\text{C}\{^1\text{H}\}$  NMR (100 MHz,  $\text{CDCl}_3$ ):  $\delta$  55.5 (cage C), 22.9.  $^{11}\text{B}\{^1\text{H}\}$  NMR (128 MHz,  $\text{CDCl}_3$ ):  $\delta$  -3.9 (3B), -10.0 (1B), -13.0 (2B), -13.7 (1B), -14.8 (3B). HRMS (EI) calcd for  $\text{C}_3\text{H}_{14}^{11}\text{B}_8^{10}\text{B}_2^+$ : 158.0847. Found 158.0844.

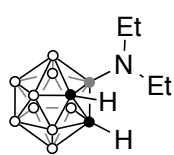
**16a:** Colorless oil. Yield: 54%.  $^1\text{H}$  NMR (400 MHz,  $\text{CDCl}_3$ ):  $\delta$  3.78 (br, 2H) (cage CH), 3.65 (m, 4H), 1.28 (m, 3H), 1.08 (m, 3H) ( $\text{CH}_3$ ).  $^{13}\text{C}\{^1\text{H}\}$  NMR (100 MHz,  $\text{CDCl}_3$ ):  $\delta$  55.4 (cage C), 48.4, 39.6, 14.5, 11.2.  $^{11}\text{B}\{^1\text{H}\}$  NMR (128 MHz,  $\text{CDCl}_3$ ):  $\delta$  -1.1 (1B), -4.5 (2B), -10.9 (1B), -13.7 (2B), -14.9 (3B), -16.3 (1B). HRMS (EI) calcd for  $\text{C}_6\text{H}_{21}^{11}\text{B}_8^{10}\text{B}_2\text{N}^+$ : 215.1792. Found 215.1797.

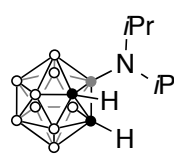
**16b:** Colorless oil. Yield: 43%.  $^1\text{H}$  NMR (400 MHz,  $\text{CDCl}_3$ ):  $\delta$  3.47 (br, 2H) (cage CH), 3.41 (m, 2H), 1.18 (d,  $J = 6.8$  Hz, 12H) ( $\text{CH}_3$ ).  $^{13}\text{C}\{^1\text{H}\}$  NMR (100 MHz,  $\text{CDCl}_3$ ):  $\delta$  56.8 (cage C), 49.0, 22.6.  $^{11}\text{B}\{^1\text{H}\}$  NMR (128 MHz,  $\text{CDCl}_3$ ):  $\delta$  -1.14 (1B), -4.5 (2B), -10.9 (1B), -13.7 (2B), -14.9 (3B), -16.3 (1B). HRMS (EI) calcd for  $\text{C}_8\text{H}_{25}^{11}\text{B}_8^{10}\text{B}_2\text{N}^+$ : 243.2324. Found 243.2328.

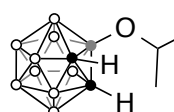
**17b:** Colorless oil. Yield: 95%.  $^1\text{H}$  NMR (400 MHz,  $\text{CDCl}_3$ ):  $\delta$  4.32 (m, 1H), 3.53 (br, 2H) (cage CH), 1.27 (d,  $J = 6.0$  Hz, 6H).  $^{13}\text{C}\{^1\text{H}\}$  NMR (100 MHz,  $\text{CDCl}_3$ ):  $\delta$  73.0, 56.1 (cage C), 24.2.  $^{11}\text{B}\{^1\text{H}\}$  NMR (128 MHz,  $\text{CDCl}_3$ ):  $\delta$  1.3 (1B), -5.4 (2B), -13.1 (1B), -15.0 (3B), -16.1 (2B), -19.9 (1B). HRMS (EI) calcd for  $\text{C}_5\text{H}_{18}^{11}\text{B}_8^{10}\text{B}_2\text{O}^+$ : 202.1373. Found 202.1372.

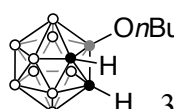
**17c:** Colorless oil. Yield: 87%.  $^1\text{H}$  NMR (400 MHz,  $\text{CDCl}_3$ ):  $\delta$  3.89 (t,  $J = 6.4$  Hz, 2H), 3.56 (br, 2H) (cage CH), 1.62 (m, 2H), 1.39 (m, 2H), 0.94 (t,  $J = 7.2$  Hz, 3H).  $^{13}\text{C}\{^1\text{H}\}$  NMR (100 MHz,  $\text{CDCl}_3$ ):  $\delta$  70.6, 56.0 (cage C), 33.3, 19.0, 13.9.  $^{11}\text{B}\{^1\text{H}\}$  NMR (128 MHz,  $\text{CDCl}_3$ ):  $\delta$  0.7 (1B), -5.9 (2B), -13.4 (1B), -15.3 (3B), -16.5 (2B), -20.4 (1B). HRMS (EI) calcd for  $\text{C}_6\text{H}_{20}^{11}\text{B}_8^{10}\text{B}_2\text{O}^+$ :

216.1639. Found 216.1635.

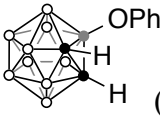 **17e:** Colorless oil. Yield: 81%.  $^1\text{H}$  NMR (400 MHz,  $\text{CDCl}_3$ ):  $\delta$  7.34 (m, 2H), 7.13 (m, 3H) (aromatic CH), 3.75 (br, 2H) (cage CH).  $^{13}\text{C}\{^1\text{H}\}$  NMR (100 MHz,  $\text{CDCl}_3$ ):  $\delta$  155.7, 130.0, 123.9, 119.8, 56.2 (cage C).  $^{11}\text{B}\{^1\text{H}\}$  NMR (128 MHz,  $\text{CDCl}_3$ ):  $\delta$  -0.6 (1B), -4.9 (2B), -12.1 (1B), -14.5 (2B), -15.2 (1B), -15.8 (2B), -18.9 (1B). HRMS (EI) calcd for  $\text{C}_8\text{H}_{16}^{11}\text{B}_8^{10}\text{B}_2\text{O}^+$ : 236.1536. Found 236.1639.

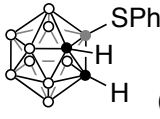 **17f:** Colorless oil. Yield: 77%.  $^1\text{H}$  NMR (400 MHz,  $\text{CDCl}_3$ ):  $\delta$  6.96 (m, 2H), 6.84 (m, 3H) (aromatic CH), 3.75 (br, 2H) (cage CH).  $^{13}\text{C}\{^1\text{H}\}$  NMR (100 MHz,  $\text{CDCl}_3$ ):  $\delta$  153.8, 131.3, 127.9, 121.6, 56.2 (cage C).  $^{11}\text{B}\{^1\text{H}\}$  NMR (128 MHz,  $\text{CDCl}_3$ ):  $\delta$  -2.9 (2B), -9.5 (1B), -11.2 (1B), -12.1 (2B), -13.1 (1B), -14.1 (3B). HRMS (EI) calcd for  $\text{C}_8\text{H}_{16}^{11}\text{B}_8^{10}\text{B}_2\text{S}^+$ : 252.2190. Found 252.2188.

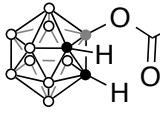 **18:** Colorless oil. Yield: 81%.  $^1\text{H}$  NMR (400 MHz,  $\text{CD}_2\text{Cl}_2$ ):  $\delta$  7.74 (m, 2H), 7.65 (m, 1H), 7.47 (m, 2H) (aromatic CH), 4.70 (br, 2H) (cage CH).  $^{13}\text{C}\{^1\text{H}\}$  NMR (100 MHz,  $\text{CD}_2\text{Cl}_2$ ):  $\delta$  162.0, 134.3, 132.1, 129.8, 127.2, 57.8 (cage C).  $^{11}\text{B}\{^1\text{H}\}$  NMR (128 MHz,  $\text{CD}_2\text{Cl}_2$ ):  $\delta$  0.4 (1B), -6.4 (2B), -12.7 (1B), -15.0 (2B), -15.7 (1B), -16.7 (2B), -21.4 (1B). HRMS (EI) calcd for  $\text{C}_9\text{H}_{16}^{11}\text{B}_8^{10}\text{B}_2\text{O}_2^+$ : 264.1638. Found 264.1635.

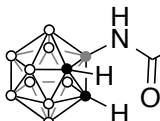 **19b:** White solid. Yield: 83%.  $^1\text{H}$  NMR (400 MHz,  $\text{CD}_2\text{Cl}_2$ ):  $\delta$  7.75 (d,  $J = 7.6$  Hz, 2H), 7.54 (m, 1H), 7.44 (m, 1H) (aromatic CH), 4.81 (br, 2H) (cage CH).  $^{13}\text{C}\{^1\text{H}\}$  NMR (100 MHz,  $\text{CD}_2\text{Cl}_2$ ):  $\delta$  161.4, 132.9, 132.7, 129.1, 127.6, 127.5, 58.2 (cage C).  $^{11}\text{B}\{^1\text{H}\}$  NMR (128 MHz,  $\text{CD}_2\text{Cl}_2$ ):  $\delta$  -4.3 (2B), -6.3 (1B), -10.0 (1B), -13.8 (6B). HRMS (EI) calcd for  $\text{C}_9\text{H}_{17}^{11}\text{B}_8^{10}\text{B}_2\text{ON}^+$ : 263.1790. Found 263.1788.

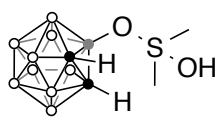

**20:** White solid. Yield: 95%.  $^1\text{H}$  NMR (400 MHz,  $\text{CD}_2\text{Cl}_2$ ):  $\delta$  5.43 (br, 1H) (OH), 3.70 (br, 2H) (cage CH), 2.61 (s, 6H) ( $\text{CH}_3$ ).  $^{13}\text{C}\{^1\text{H}\}$  NMR (100 MHz,  $\text{CD}_2\text{Cl}_2$ ):  $\delta$  57.2 (cage C), 56.1, 41.0.  $^{11}\text{B}\{^1\text{H}\}$  NMR (128 MHz,  $\text{CD}_2\text{Cl}_2$ ):  $\delta$  0.5 (1B), -6.3 (2B), -12.7 (1B), -15.0 (2B), -15.6 (1B), -16.6 (2B), -21.3 (1B). HRMS (EI) calcd for  $\text{C}_4\text{H}_{18}^{11}\text{B}_8^{10}\text{B}_2\text{OS}^+$ : 222.1914. Found 222.1918.

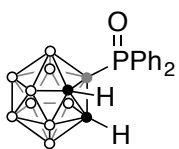

**21a:** White solid. Yield: 53%.  $^1\text{H}$  NMR (400 MHz, acetone- $d_6$ ):  $\delta$  7.88 (m, 4H), 7.65-7.53 (m, 6H) (aromatic CH), 4.88 (br, 2H) (cage CH).  $^{13}\text{C}\{^1\text{H}\}$  NMR (100 MHz, acetone- $d_6$ ):  $\delta$  136.2 (d,  $J_{\text{C-P}} = 71.7$  Hz), 132.4 (d,  $J_{\text{C-P}} = 2.8$  Hz), 131.1 (d,  $J_{\text{C-P}} = 10.5$  Hz), 128.5 (d,  $J_{\text{C-P}} = 2.8$  Hz), 46.6 (cage C).  $^{11}\text{B}\{^1\text{H}\}$  NMR (128 MHz, acetone- $d_6$ ):  $\delta$  -2.5 (3B), -8.6 (1B), -11.6 (2B), -12.3 (1B), -13.5 (3B).  $^{31}\text{P}\{^1\text{H}\}$  NMR (162 MHz, acetone- $d_6$ ):  $\delta$  29.0 (br, 1P). HRMS (EI) calcd for  $\text{C}_{14}\text{H}_{21}^{11}\text{B}_8^{10}\text{B}_2\text{PO}^+$ : 344.2315. Found 344.2311.

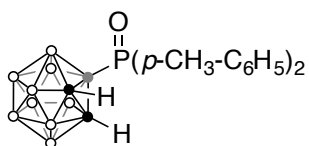

**21b:** White solid. Yield: 62%.  $^1\text{H}$  NMR (400 MHz,  $\text{CD}_2\text{Cl}_2$ ):  $\delta$  7.67 (m, 4H), 7.45 (m, 4H) (aromatic CH), 3.73 (br, 2H) (cage CH), 2.48 (br, 6H).  $^{13}\text{C}\{^1\text{H}\}$  NMR (100 MHz,  $\text{CD}_2\text{Cl}_2$ ):  $\delta$  146.9 (d,  $J_{\text{C-P}} = 73.1$  Hz), 132.5 (d,  $J_{\text{C-P}} = 13.0$  Hz), 130.9 (d,  $J_{\text{C-P}} = 14.0$  Hz), 130.6 (d,  $J_{\text{C-P}} = 7.8$  Hz), 57.1 (cage C), 22.1, 21.9.  $^{11}\text{B}\{^1\text{H}\}$  NMR (128 MHz,  $\text{CD}_2\text{Cl}_2$ ):  $\delta$  -2.2 (3B), -8.3 (1B), -11.3 (2B), -12.0 (1B), -13.2 (3B).  $^{31}\text{P}\{^1\text{H}\}$  NMR (162 MHz, acetone- $d_6$ ):  $\delta$  33.9 (br, 1P). HRMS (EI) calcd for  $\text{C}_{16}\text{H}_{25}^{11}\text{B}_8^{10}\text{B}_2\text{PO}^+$ : 372.2847. Found 372.2846.

#### A 0.5 mmol scale reaction of carboranyl diazonium salt 1 with CsF.

Under an atmosphere of dry argon, dry  $\text{CH}_3\text{CN}$  (3 mL) was added to an open Schlenk flask (10 mL) containing 3-diazonium-*o*-carborane tetrafluoroborate (**1**; 129.0 mg, 0.5 mmol) and CsF (76.0 mg, 0.5 mmol). Bubbles were immediately observed at the surface of CsF. The reaction mixture was further stirred at room temperature for 60 min. The resulting mixture was examined by GC-MS analysis. After

removal of solvents in vacuo, the residue was examined by  $^1\text{H}$  NMR spectrum and then subjected to flash column chromatography on  $\text{Al}_2\text{O}_3$  (activated, neutral, Merck, 70-230 mesh mesh) using *n*-hexane/EtOAc (100/1 in V/V) as eluent to give **3a** as a white solid (66.8 mg, 83%).

**Caution:** For nucleophiles such as CsF that are poorly dissolved in  $\text{CH}_3\text{CN}$ ,  $\text{CH}_3\text{CN}$  can be added to the mixture of diazonium salt **1** and nucleophile at room temperature. For nucleophiles that have good solubility in  $\text{CH}_3\text{CN}$ , such as LiCl, we recommend that the nucleophiles should be added in small portion to a  $\text{CH}_3\text{CN}$  solution of **1** at a lower temperature ( $-30\text{ }^\circ\text{C}$ ) to avoid rapid nitrogen gas evolution.

### Reaction of carboranyl diazonium salt **1** with ethers.

**Reaction of carboranyl diazonium salt **1** with anhydrous diethyl ether.** Under an atmosphere of dry argon, a suspension of 3-diazonium-*o*-carborane tetrafluoroborate (**1**; 25.8 mg, 0.1 mmol) in anhydrous diethyl ether (2 mL) in a 10 mL Schlenk flask was stirred at room temperature for 24 h. No bubble was observed during this period. Then the reaction was stopped and diethyl ether was removed in vacuo. The resulting residue was redissolved in anhydrous acetonitrile- $d_3$  and examined by  $^1\text{H}$  NMR spectrum. The results show that precursor **1** was recovered ( $> 99\%$ , eq S2).

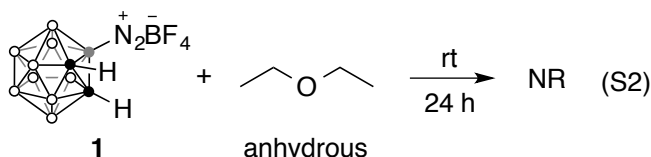

**Reaction of carboranyl diazonium salt **1** with wet diethyl ether.** Under an atmosphere of dry argon, to a 10 mL Schlenk flask containing 3-diazonium-*o*-carborane tetrafluoroborate (**1**; 25.8 mg, 0.1 mmol) was added wet diethyl ether (2 mL, containing  $\sim 5\%$  water) at room temperature with stirring. Bubbles were observed immediately. After stirring at room temperature for 1 min, the reaction was stopped and the solvents was removed in vacuo. The resulting residue was examined by GC-MS analysis and  $^1\text{H}$  NMR spectrum. Then the crude reaction mixture was subjected to flash column chromatography

on Al<sub>2</sub>O<sub>3</sub> (active, neutral, Merck, 70-230 mesh mesh) using *n*-hexane/EtOAc (100/1 in v/v) as eluent to give **13** as the only product (17.9 mg, 95%). No 3-hydroxyl-*o*-C<sub>2</sub>B<sub>10</sub>H<sub>11</sub> **17g** was detected (eq S4).

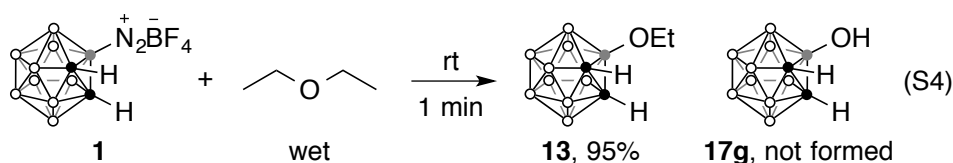

**Reaction of carboranyl diazonium salt 1 with anhydrous THF.** Under an atmosphere of dry argon, a solution of 3-diazoniom-*o*-carborane tetrafluoroborate (**1**; 25.8 mg, 0.1 mmol) in anhydrous THF (2 mL) in a 10 mL Schlenk flask was stirred at room temperature. Gelation occurred in 10 min with the observation of gas bubbles (eq S3 and Figure S3).

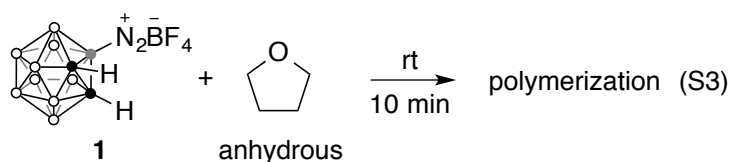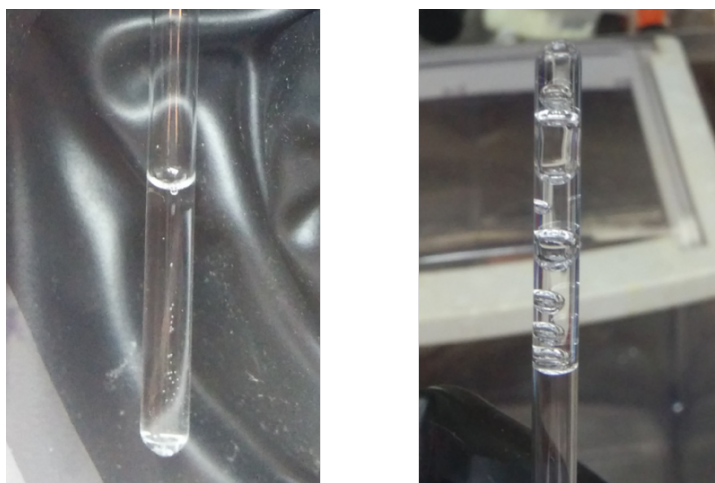

**Figure S4.** THF solution of **1**: gradually bubbles ( $t = 30\text{s}$ , left) and gel formation ( $t = 10\text{ min}$ , right).

**Reaction of carboranyl diazonium salt 1 with wet *tert*-butyl methyl ether.** Under an atmosphere of dry argon, to a 10 mL Schlenk flask containing 3-diazoniom-*o*-carborane tetrafluoroborate (**1**; 25.8 mg, 0.1 mmol) was added wet *tert*-butyl methyl ether (2 mL, containing ~5% water) at room temperature with stirring. Bubbles were observed immediately. After stirring at room temperature for 1 min, the reaction

was stopped and the solvents was removed in vacuo. The resulting residue was examined by GC-MS analysis and  $^1\text{H}$  NMR spectrum. Then the crude reaction mixture was subjected to flash column chromatography on  $\text{Al}_2\text{O}_3$  (active, neutral, Merck, 70-230 mesh mesh) using *n*-hexane/EtOAc (100/1 in v/v) as eluent to give **17a** as the only product (17.4 mg, quant). No 3-*O*'Butyl-*o*- $\text{C}_2\text{B}_{10}\text{H}_{11}$  **17d** was detected (eq S5).

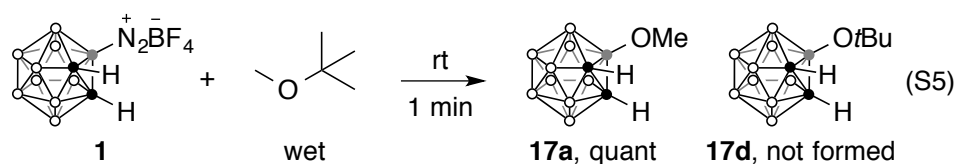

**Formation of  $\text{HBF}_4$  in the reaction of carboranyl diazonium salt **1** with methanol.** The formation of  $\text{HBF}_4$  was indicated by comparing the crude  $^{11}\text{B}$  and  $^{19}\text{F}$  NMR spectra of the reaction mixture with the  $\text{CH}_3\text{CN}$  solution of  $\text{HBF}_4$  (48 wt. % in  $\text{H}_2\text{O}$ ) as external standard (Figures S5 and S6).

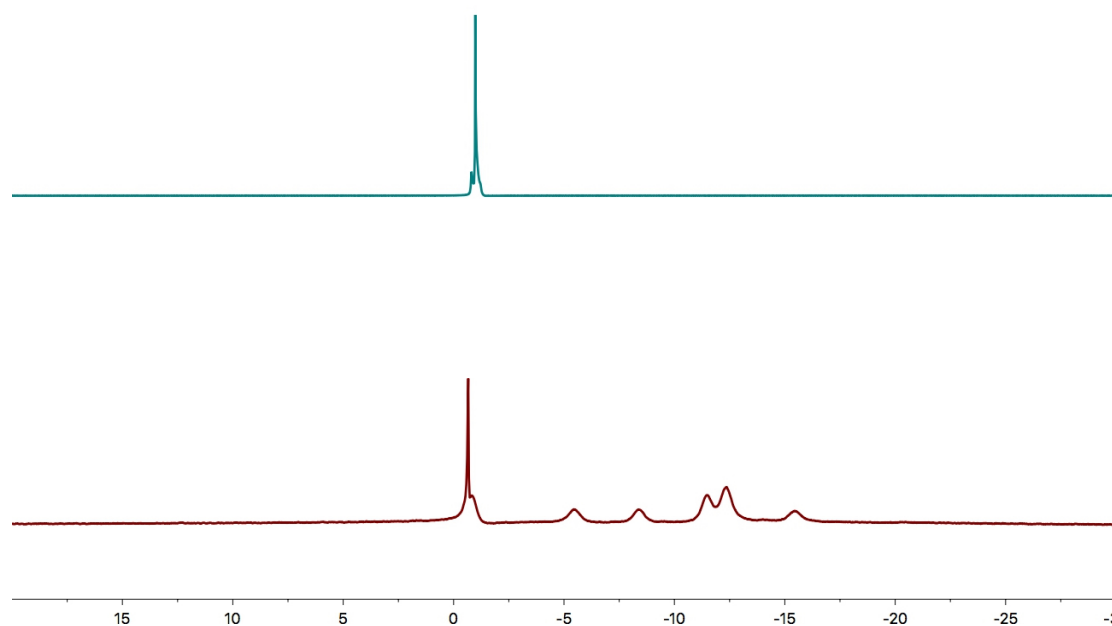

**Figure S5.**  $^{11}\text{B}$  NMR spectra of  $\text{HBF}_4$  (48 wt. % in  $\text{H}_2\text{O}$ ) in  $\text{CH}_3\text{CN}$  (top) and the crude reaction mixture from the reaction of precursor **1** with methanol in  $\text{CH}_3\text{CN}$  (bottom).

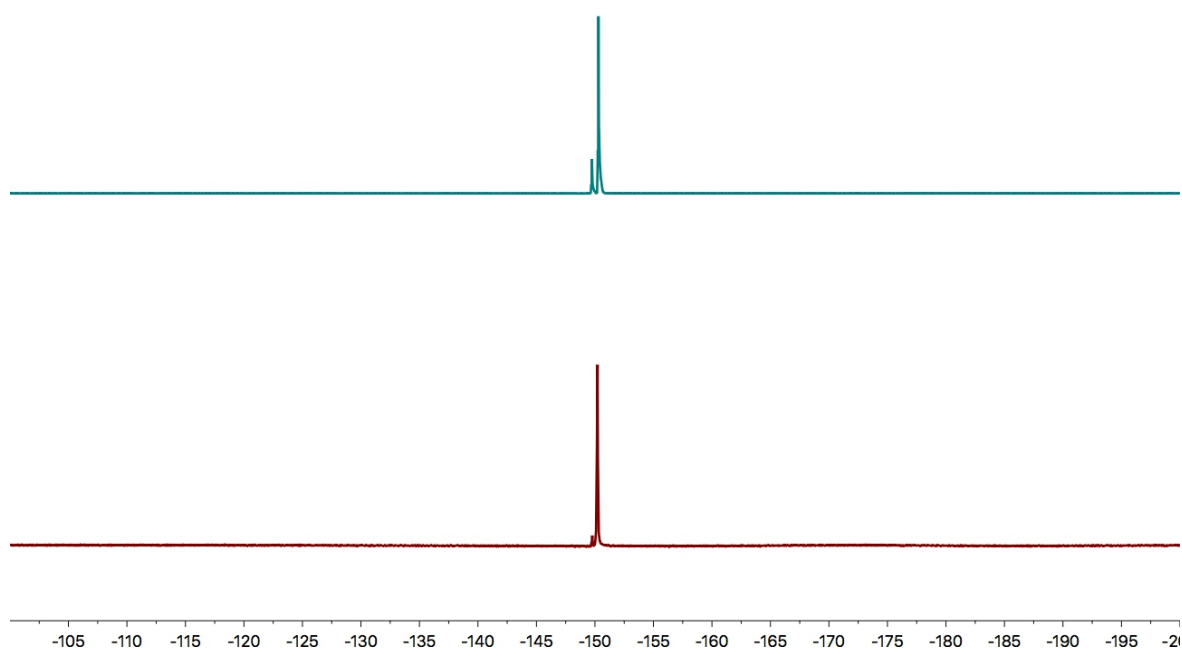

**Figure S6.**  $^{19}\text{F}$  NMR spectra of  $\text{HBF}_4$  (48 wt. % in  $\text{H}_2\text{O}$ ) in  $\text{CH}_3\text{CN}$  (top) and the crude reaction mixture from the reaction of precursor **1** with methanol in  $\text{CH}_3\text{CN}$  (bottom).

**Proof-of-concept synthesis of 3-fluoro-*o*-carborane under reported reaction conditions.**<sup>8</sup> Under an atmosphere of dry argon, to a 5 mL Schlenk flask containing 3-diazonium-*o*-carborane tetrafluoroborate (**1**; 5.8 mg, 0.02 mmol), CsF (3.4 mg, 0.02 mmol), Kryptofix 222 (8.4 mg, 0.02 mmol) was added anhydrous  $\text{CH}_3\text{CN}$  (1 mL) at room temperature with stirring. Bubbles were observed immediately and ceased in 1 min. Then the reaction was stopped and the solvent was removed in vacuo. The resulting residue was examined by GC-MS analysis and  $^1\text{H}$  NMR spectrum. Then the crude reaction mixture was dissolved in diethyl ether and quickly passed through a short column of silica gel (230-400 mesh) to remove the inorganic salt. Removal of the solvent afforded 3-fluoro-*o*-carborane **3a** as white solid (3.1 mg, 98%) (eq S6).

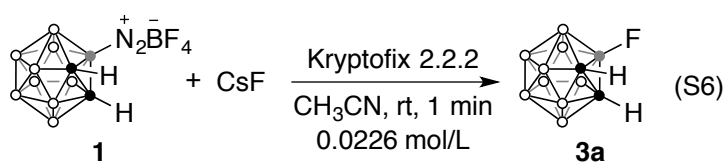



**X-ray structure determination.** All data were collected at 293 K on a Bruker SMART 1000 CCD diffractometer using Mo-K $\alpha$  radiation. An empirical absorption correction was applied using the SADABS program.<sup>9</sup> All structures were solved by direct methods and subsequent Fourier difference techniques and refined anisotropically for all non-hydrogen atoms by full-matrix least squares calculations on  $F^2$  using the SHELXTL program package.<sup>10</sup> All hydrogen atoms were geometrically fixed using the riding model.

CCDC 1473011 (**4**) and 1473012 (**6**) contain the supplementary crystallographic data for this paper. These data can be obtained free of charge from The Cambridge Crystallographic Data Centre via [www.ccdc.cam.ac.uk/data\\_request/cif](http://www.ccdc.cam.ac.uk/data_request/cif).

## References

- (1) D. Zhao, J. Zhang and Z. Xie, *Angew. Chem., Int. Ed.*, **2014**, *53*, 8488–8491.
- (2) J. S. Roscoe, S. Kongpricha and S. Papetti, *Inorg. Chem.*, 1970, **9**, 1561–1563.
- (3) L. I. Zakharkin, V. N. Kalinin and V. V. Gedymin, *J. Organomet. Chem.*, 1969, **16**, 371–379.
- (4) J. Li and M. Jones, Jr, *Inorg. Chem.*, 1990, **29**, 4162–4163.
- (5) J. Li, C. F. Logan and M. Jones, Jr, *Inorg. Chem.*, 1991, **30**, 4866–4868.
- (6) Y. Sevryugina, R. L. Julius and M. F. Hawthorne, *Inorg. Chem.*, 2010, **49**, 10627–10634.
- (7) K. Aizawa, K. Ohta and Y. Endo, *Inorg. Chem.*, 2001, **40**, 6555–6562.
- (8) K. B. Gona, V. Gómez-Vallejo, D. Padro and J. Llop, *Chem. Commun.*, 2013, **49**, 11491–11493.
- (9) G. M. Sheldrick, SADABS: Program for Empirical Absorption Correction of Area Detector Data. University of Göttingen, Germany, 1996.
- (10) G. M. Sheldrick, SHELXTL 5.10 for Windows NT: Structure Determination Software Programs. Bruker Analytical X-ray Systems, Inc., Madison, Wisconsin, USA, 1997.

7.260

3.763

ZD-7375-CDC13-H

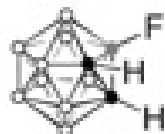

3a

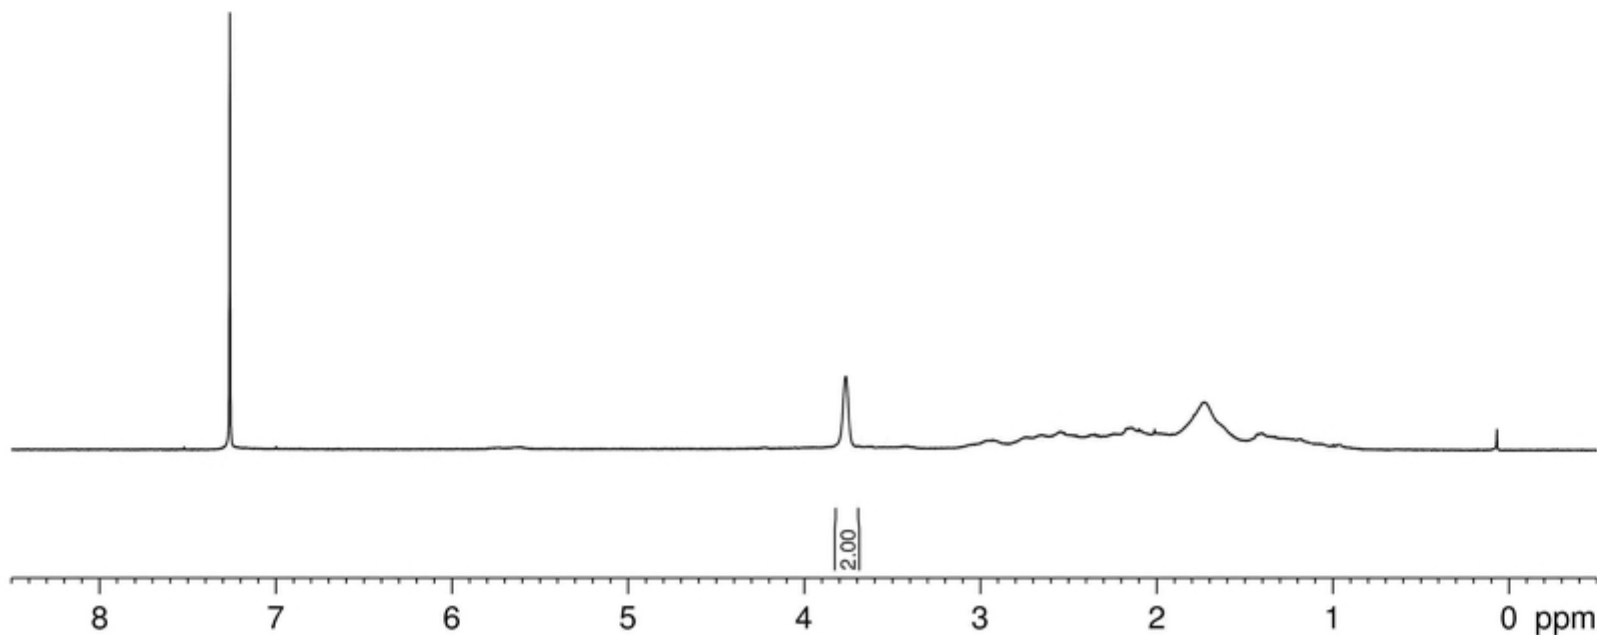

Current Data Parameters  
NAME ZD-7375-CDC13-H  
EXPNO 2  
PROCNO 1

F2 - Acquisition Parameters  
Date\_ 20151112  
Time 14.01 h  
INSTRUM spect  
PROBHD Z108618\_0257 (  
PULPROG zg30  
TD 65536  
SOLVENT CDCl3  
NS 8  
DS 2  
SWH 8012.820 Hz  
FIDRES 0.122266 Hz  
AQ 4.0894465 sec  
RG 144  
DW 62.400 usec  
DE 6.50 usec  
TE 294.5 K  
D1 1.00000000 sec  
TD0 1  
SFO1 400.2324714 MHz  
NUC1 1H  
P1 12.80 usec  
PLW1 13.56000042 W

F2 - Processing parameters  
SI 65536  
SF 400.2300101 MHz  
WDW EM  
SSB 0  
LB 0.30 Hz  
GB 0  
PC 1.00



3a

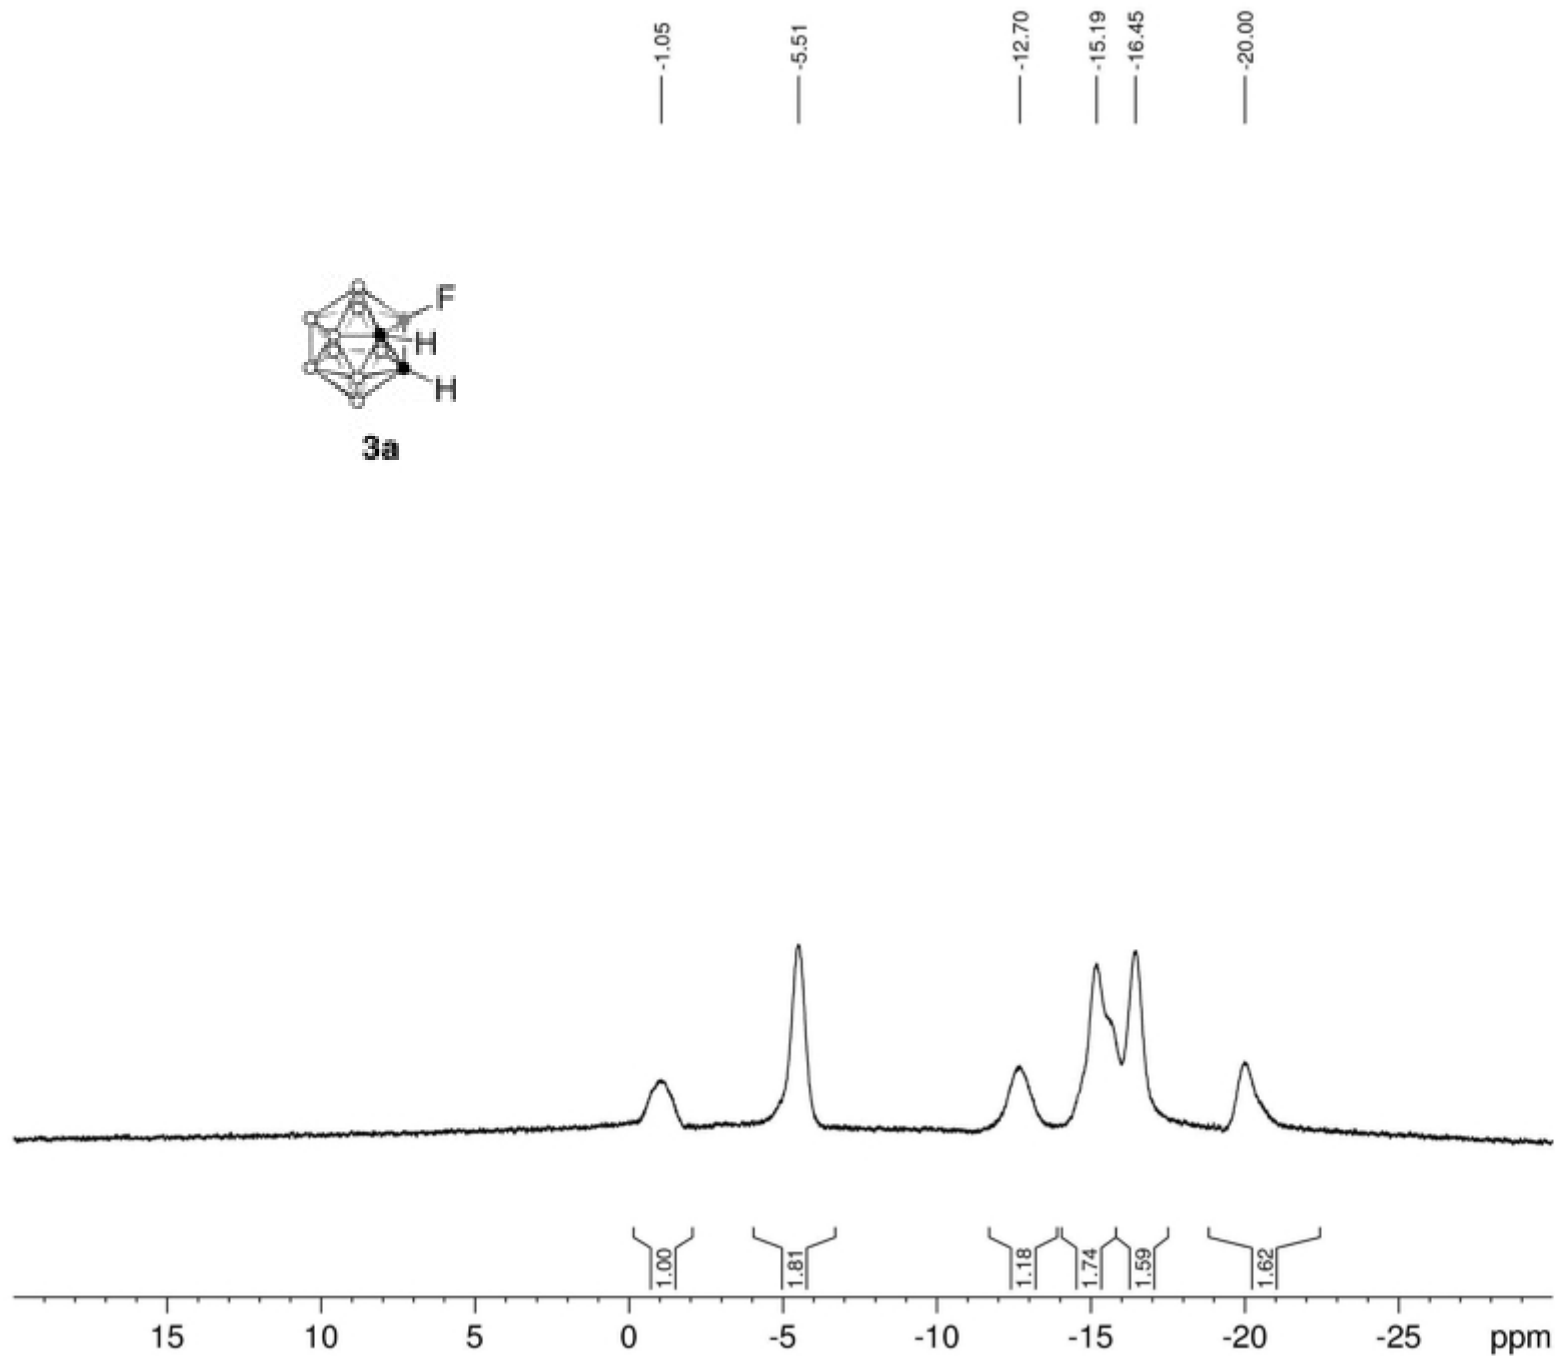

ZD-7375-CDC13-B (de)

Current Data Parameters  
 NAME ZD-7375-CDC13-B(de)  
 EXPNO 1  
 PROCNO 1

F2 - Acquisition Parameters  
 Date\_ 20151112  
 Time 14.04 h  
 INSTRUM spect  
 PROBHD Z108618\_0257 (  
 PULPROG zgdc  
 TD 65536  
 SOLVENT CDC13  
 NS 13  
 DS 4  
 SWH 24038.461 Hz  
 FIDRES 0.366798 Hz  
 AQ 1.3631488 sec  
 RG 362  
 DW 20.800 usec  
 DE 6.50 usec  
 TE 295.1 K  
 D1 2.0000000 sec  
 D11 0.03000000 sec  
 TD0 1  
 SFO1 128.4096890 MHz  
 NUC1 11B  
 P1 7.50 usec  
 PLW1 55.09999847 W  
 SFO2 400.2316009 MHz  
 NUC2 1H  
 CPDPRG[2] waltz16  
 PCPD2 90.00 usec  
 PLW2 13.56000042 W  
 PLW12 0.27428001 W

F2 - Processing parameters  
 SI 32768  
 SF 128.4097615 MHz  
 WDW EM  
 SSB 0  
 LB 1.00 Hz  
 GB 0  
 PC 1.40



3a

— -1.00  
 — -4.81  
 — -5.96  
 — -12.06  
 — -13.17  
 — -14.43  
 — -15.67  
 — -16.95  
 — -19.21  
 — -20.46

ZD-7375-CDC13-B (c)

Current Data Parameters  
 NAME ZD-7375-CDC13-B(c)  
 EXPNO 1  
 PROCNO 1

F2 - Acquisition Parameters  
 Date\_ 20151112  
 Time 14.05 h  
 INSTRUM spect  
 PROBHD Z108618\_0257 (  
 PULPROG zg  
 TD 65536  
 SOLVENT CDC13  
 NS 18  
 DS 2  
 SWH 24038.461 Hz  
 FIDRES 0.366798 Hz  
 AQ 1.3631488 sec  
 RG 101  
 DW 20.800 usec  
 DE 6.50 usec  
 TE 294.8 K  
 D1 2.0000000 sec  
 TD0 1  
 SFO1 128.4096890 MHz  
 NUC1 11B  
 P1 7.50 usec  
 PLW1 55.09999847 W

F2 - Processing parameters  
 SI 32768  
 SF 128.4097430 MHz  
 WDW EM  
 SSB 0  
 LB 1.00 Hz  
 GB 0  
 PC 1.40

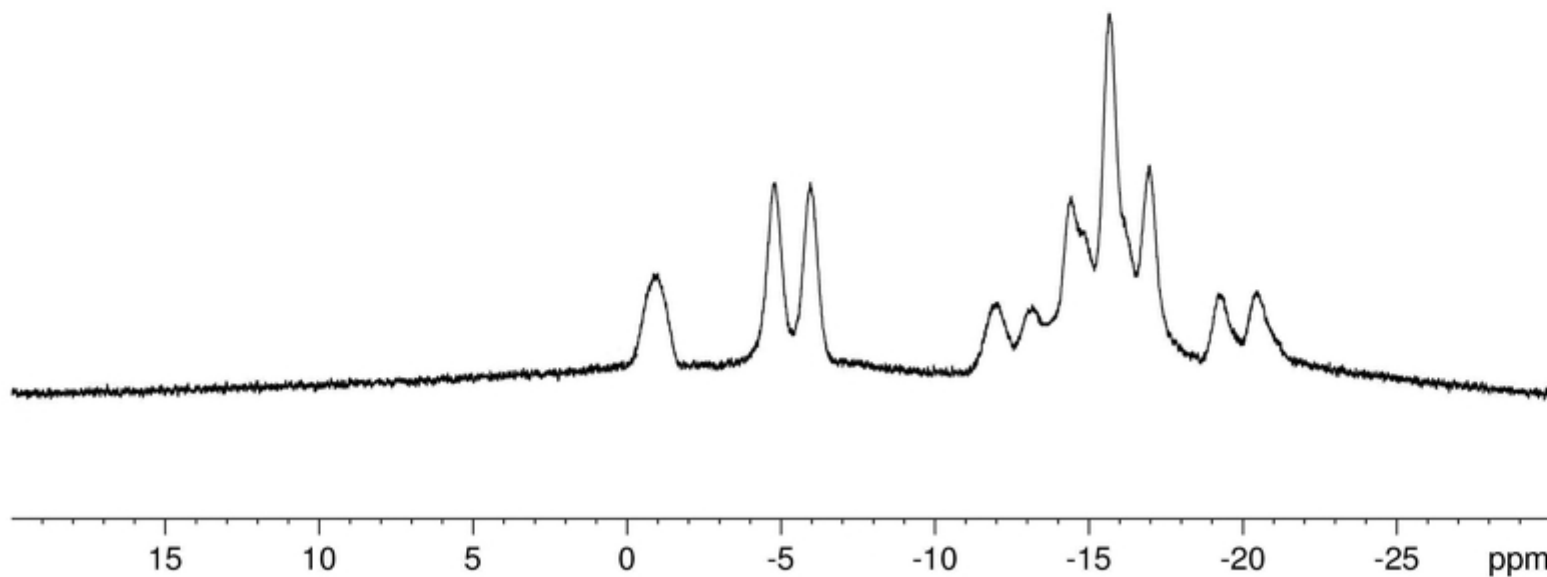

ZD-7375-CDC13-F

Current Data Parameters  
NAME ZD-7375-CDC13-F  
EXPNO 1  
PROCNO 1

F2 - Acquisition Parameters  
Date\_ 20151112  
Time 14.07 h  
INSTRUM spect  
PROBHD Z108618\_0257 (  
PULPROG zgfhigqn.2  
TD 131072  
SOLVENT CDC13  
NS 32  
DS 4  
SWH 89285.711 Hz  
FIDRES 0.681196 Hz  
AQ 0.7340032 sec  
RG 645  
DW 5.600 usec  
DE 6.50 usec  
TE 294.9 K  
D1 1.0000000 sec  
D11 0.0300000 sec  
D12 0.0000200 sec  
TD0 1  
SFO1 376.5548010 MHz  
NUC1 19F  
P1 14.70 usec  
PLW1 18.36000061 W  
SFO2 400.2316009 MHz  
NUC2 1H  
CPDPRG[2] waltz16  
PCPD2 90.00 usec  
PLW2 13.56000042 W  
PLW12 0.27428001 W

F2 - Processing parameters  
SI 65536  
SF 376.5924602 MHz  
WDW EM  
SSB 0  
LB 0.30 Hz  
GB 0  
PC 1.00

-200.85  
-200.99  
-201.14  
-201.28

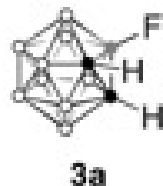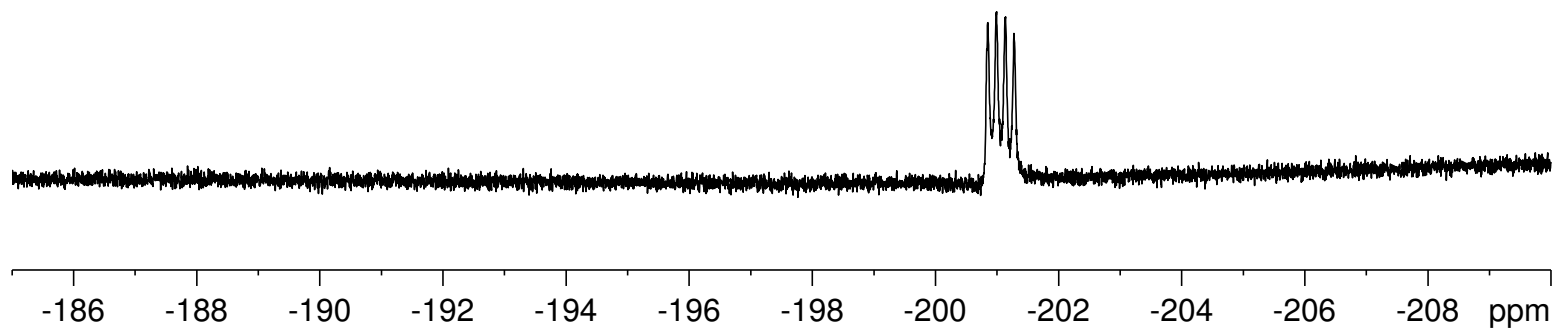

7.260

3.806

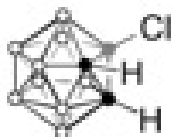

ZD-3-Cl-CDCl3-H

Current Data Parameters  
NAME ZD-3-Cl-CDCl3-H  
EXPNO 1  
PROCNO 1

F2 - Acquisition Parameters  
Date\_ 20160126  
Time 21.34 h  
INSTRUM spect  
PROBHD Z824601\_0021 (  
PULPROG zg  
TD 65536  
SOLVENT CDCl3  
NS 8  
DS 0  
SWH 8012.820 Hz  
FIDRES 0.122266 Hz  
AQ 4.0894465 sec  
RG 203  
DW 62.400 usec  
DE 6.50 usec  
TE 294.1 K  
D1 1.00000000 sec  
TD0 1  
SFO1 400.1316005 MHz  
NUC1 1H  
P1 15.00 usec  
PLW1 8.31000042 W

F2 - Processing parameters  
SI 65536  
SF 400.1300099 MHz  
WDW EM  
SSB 0  
LB 0.30 Hz  
GB 0  
PC 1.00

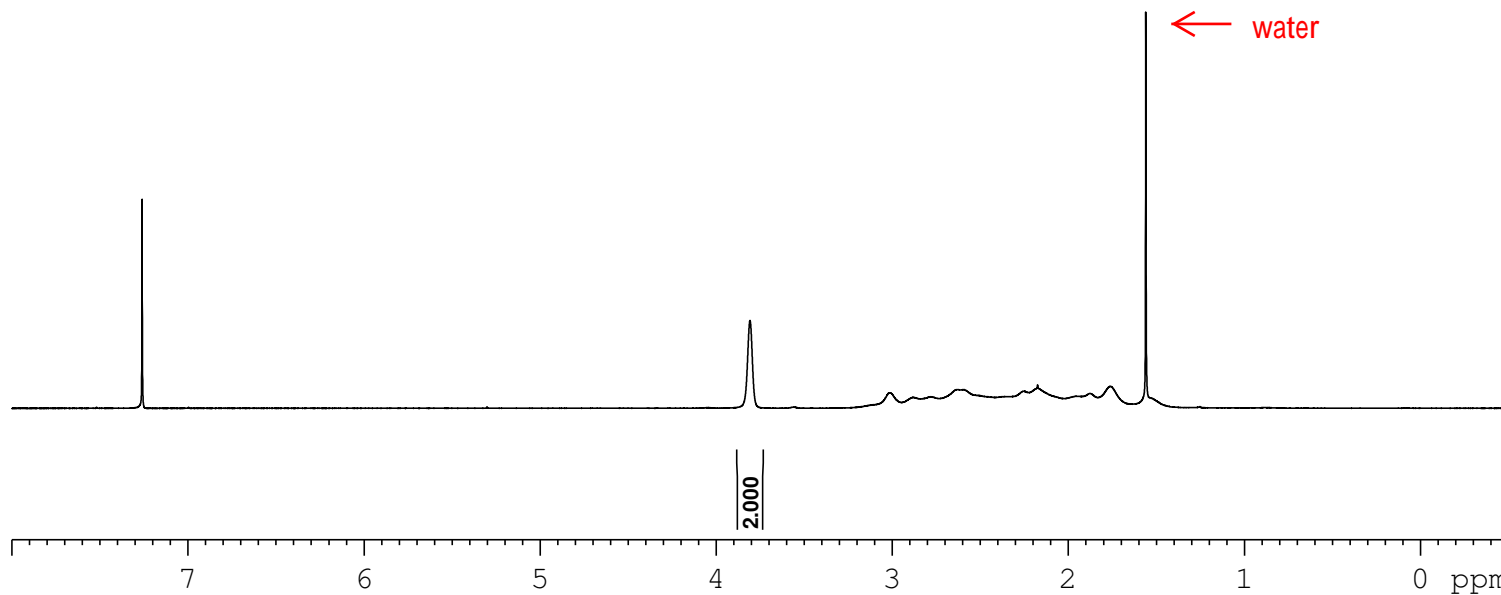

ZD-3-Br-CDCl3-H

Current Data Parameters  
NAME ZD-3-Br-CDCl3-H  
EXPNO 1  
PROCNO 1

F2 - Acquisition Parameters  
Date\_ 20160126  
Time 21.39 h  
INSTRUM spect  
PROBHD Z824601\_0021 (  
PULPROG zg  
TD 65536  
SOLVENT CDCl3  
NS 8  
DS 0  
SWH 8012.820 Hz  
FIDRES 0.122266 Hz  
AQ 4.0894465 sec  
RG 203  
DW 62.400 usec  
DE 6.50 usec  
TE 294.2 K  
D1 1.00000000 sec  
TD0 1  
SFO1 400.1316005 MHz  
NUC1 1H  
P1 15.00 usec  
PLW1 8.31000042 W

F2 - Processing parameters  
SI 65536  
SF 400.1300098 MHz  
WDW EM  
SSB 0  
LB 0.30 Hz  
GB 0  
PC 1.00

7.260

3.844

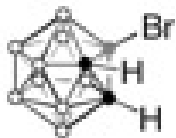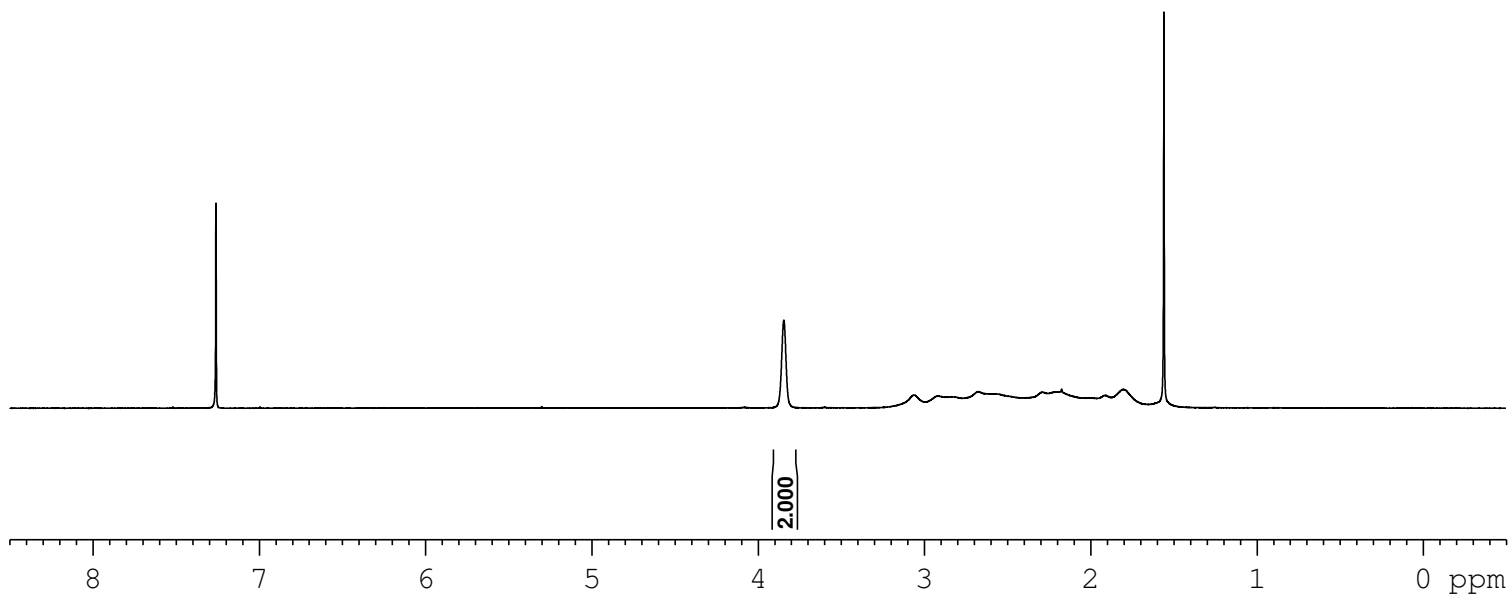

ZD-3-I-CDCl3-H

Current Data Parameters  
NAME ZD-3-I-CDCl3-H  
EXPNO 1  
PROCNO 1

F2 - Acquisition Parameters  
Date\_ 20160126  
Time 21.43 h  
INSTRUM spect  
PROBHD Z824601\_0021 (  
PULPROG zg  
TD 65536  
SOLVENT CDCl3  
NS 8  
DS 0  
SWH 8012.820 Hz  
FIDRES 0.122266 Hz  
AQ 4.0894465 sec  
RG 203  
DW 62.400 usec  
DE 6.50 usec  
TE 294.2 K  
D1 1.00000000 sec  
TD0 1  
SFO1 400.1316005 MHz  
NUC1 1H  
P1 15.00 usec  
PLW1 8.31000042 W

F2 - Processing parameters  
SI 65536  
SF 400.1300098 MHz  
WDW EM  
SSB 0  
LB 0.30 Hz  
GB 0  
PC 1.00

7.260

3.840

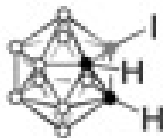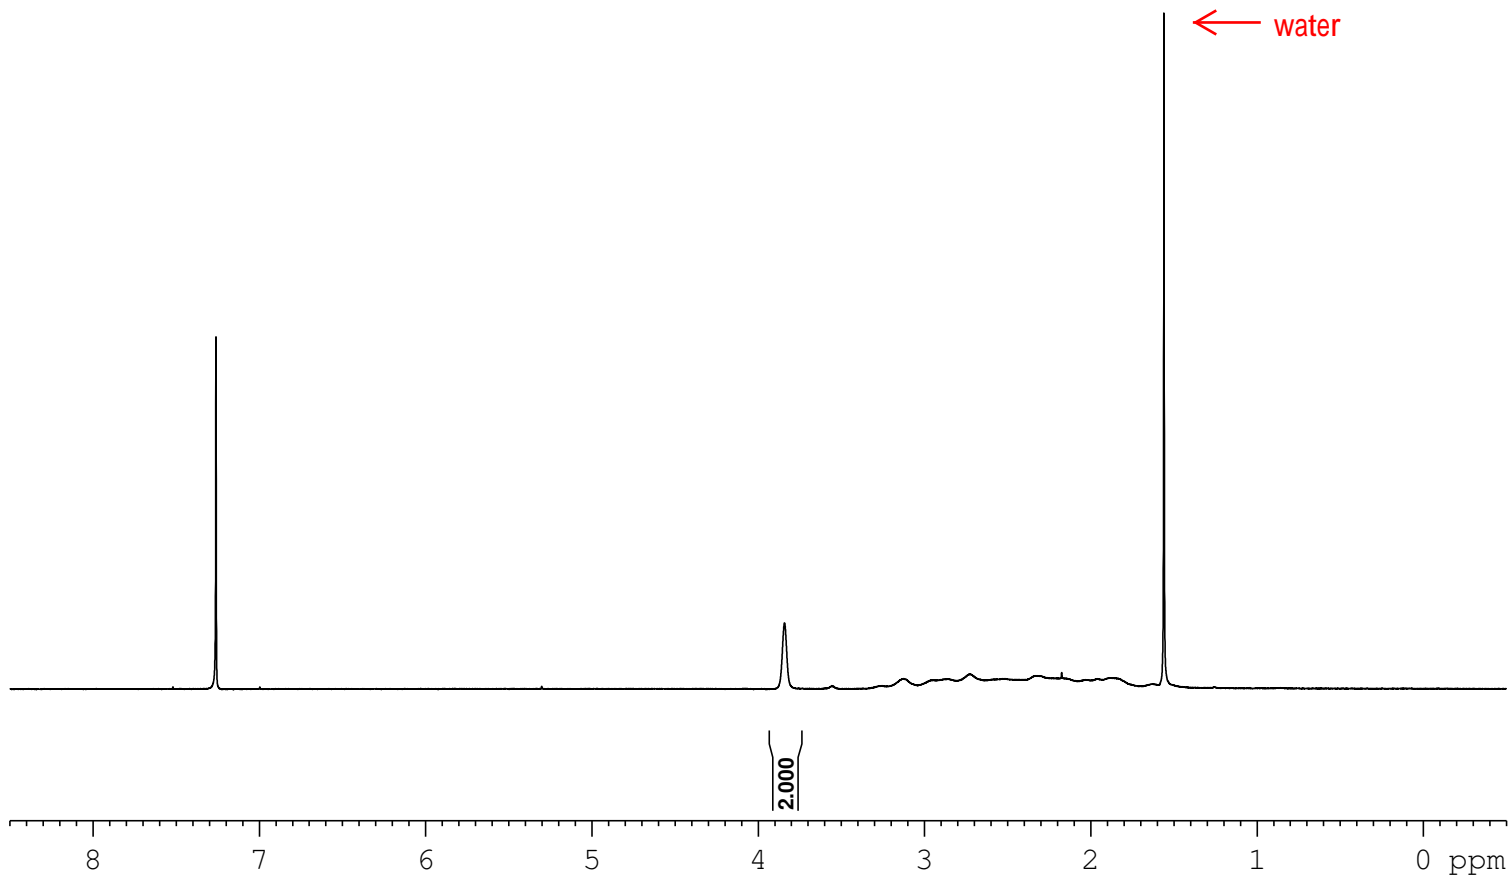



ZD-770-CDC13-H

Bruker Advance III 400

```
NAME      ZD-770-CDC13-H
EXPNO     1
PROCNO    1
Date_     20140916
Time      19.40
INSTRUM   spect
PROBHD    5 mm PADUL 13C
PULPROG   zg
TD         65536
SOLVENT   CDC13
NS         16
DS         0
SWH        10000.000 Hz
FIDRES     0.152588 Hz
AQ         3.2768500 sec
RG         144
DW         50.000 usec
DE         6.50 usec
TE         294.4 K
D1         1.00000000 sec
TD0        1
```

```
----- CHANNEL f1 -----
NUC1      1H
P1         14.83 usec
PL1        0.00 dB
PL1W       8.31434441 W
SFO1      400.1318000 MHz
SI         65536
SF         400.1300083 MHz
WDW        EM
SSB         0
LB         0.30 Hz
GB         0
PC         1.00
```

7.260

4.223

2.168

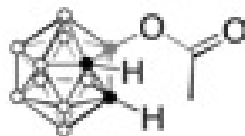

4

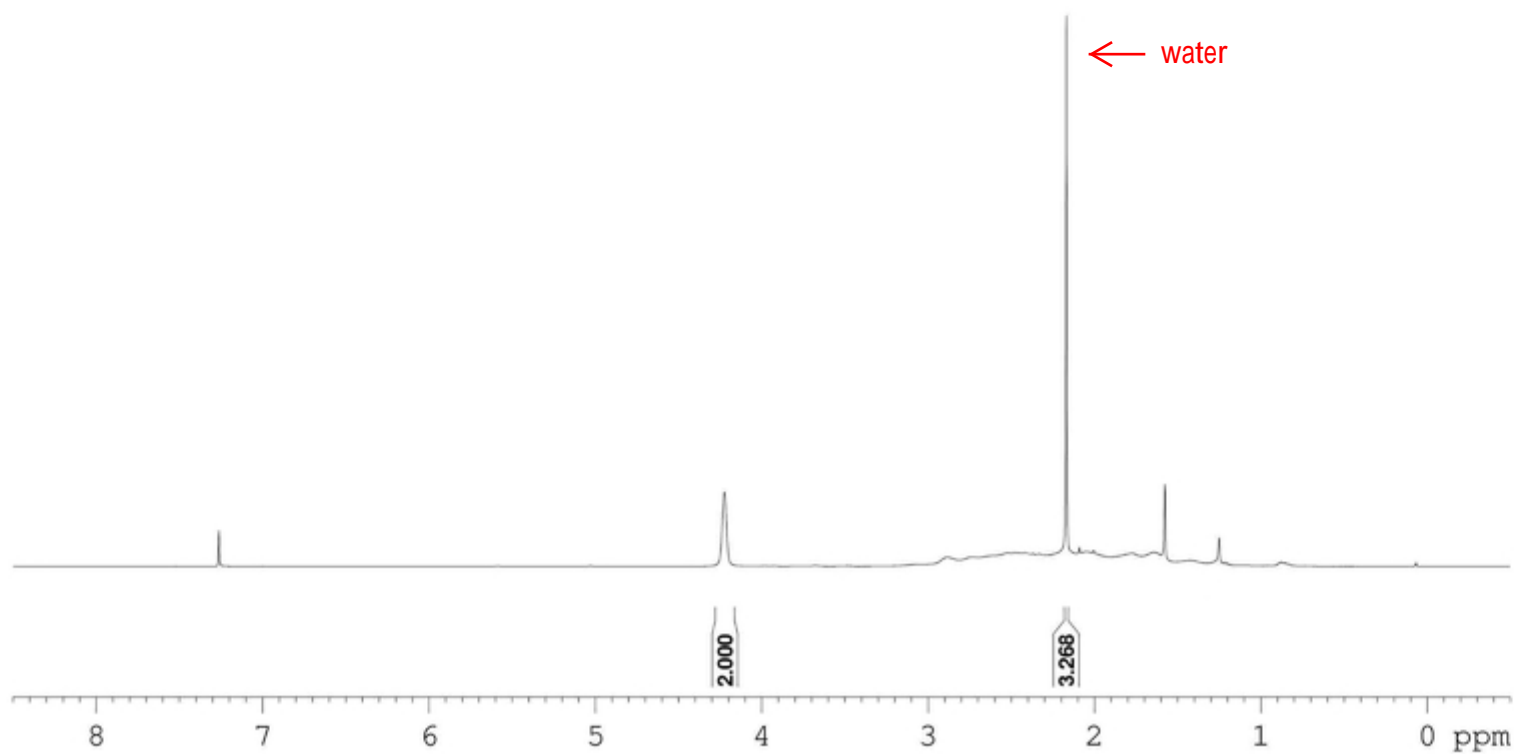

170.415

77.478  
77.160  
76.842

54.999

22.567

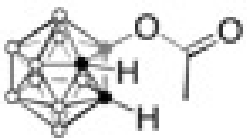

4

ZD-770-CDC13-C

Bruker Advance III 400

```

NAME      ZD-770-CDC13-C
EXPNO     1
PROCNO    1
Date_     20140916
Time      19.42
INSTRUM   spect
PROBHD    5 mm PADUL 13C
PULPROG   zgdc
TD        131072
SOLVENT   CDC13
NS        666
DS        0
SWH       29761.904 Hz
FIDRES    0.227065 Hz
AQ        2.2020595 sec
RG        203
DW        16.800 usec
DE        6.50 usec
TE        294.4 K
D1        1.00000000 sec
D11       0.03000000 sec
TD0       1

```

```

----- CHANNEL f1 -----
NUC1      13C
P1        9.68 usec
PL1       -0.60 dB
PL1W      41.24164963 W
SFO1      100.6227690 MHz

```

```

----- CHANNEL f2 -----
CPDPRG2   waltz16
NUC2      1H
PCPD2     90.00 usec
PL2       0.00 dB
PL12      15.66 dB
PL2W      8.31434441 W
PL12W     0.22585411 W
SFO2      400.1320007 MHz
SI        131072
SF        100.6127554 MHz
WDW       EM
SSB       0
LB        1.00 Hz
GB        0
PC        1.40

```

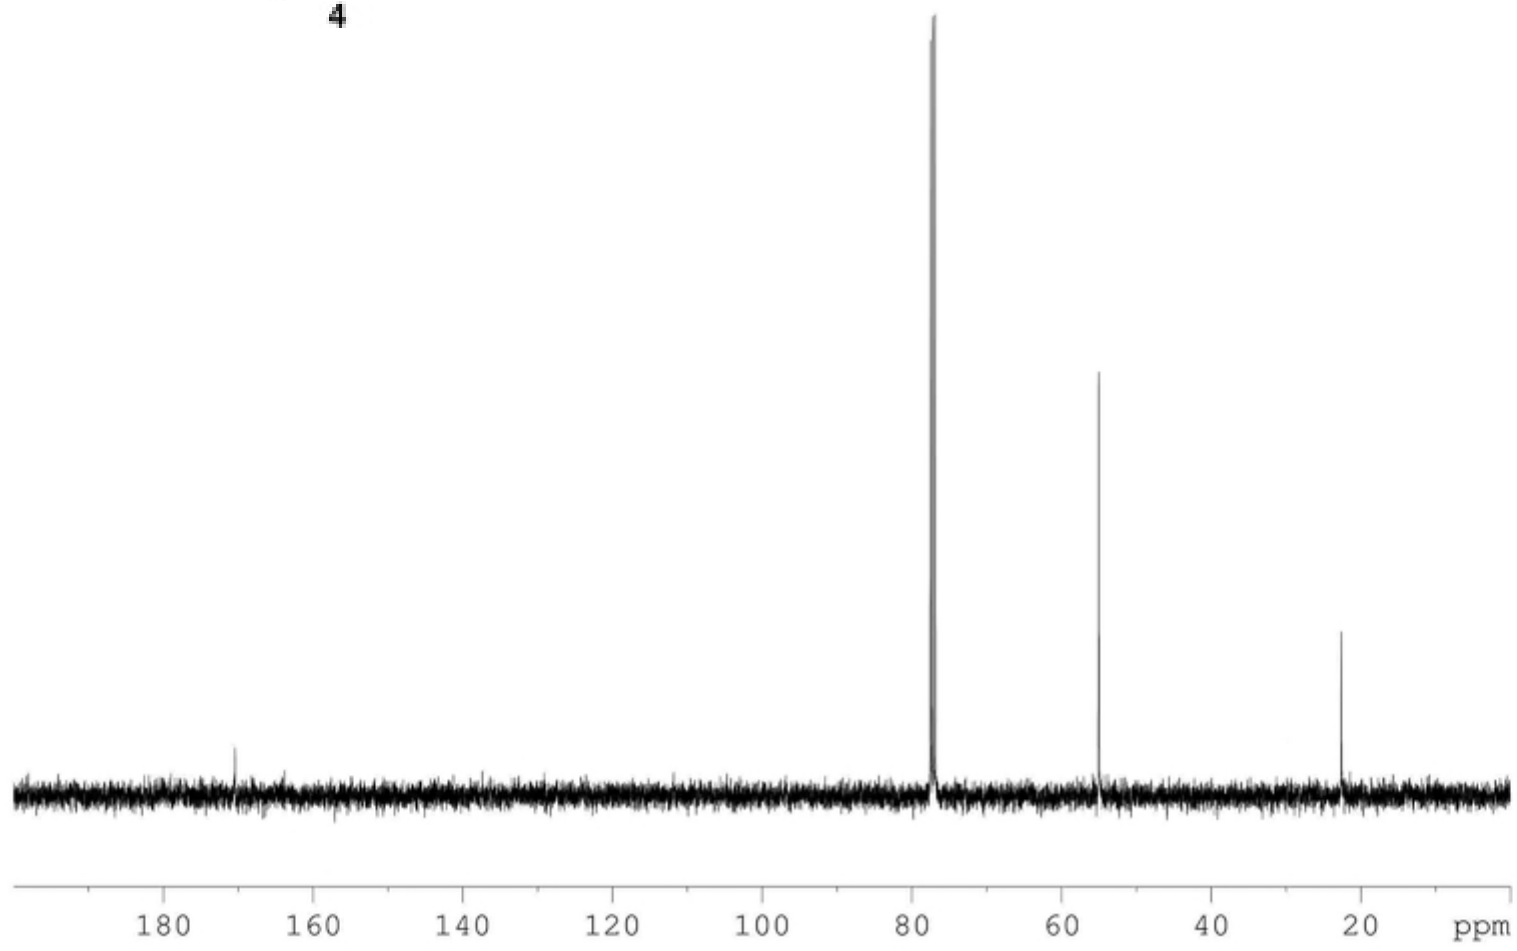

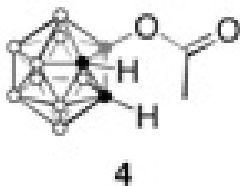

— -4.97  
 — -11.07  
 — -14.04  
 — -14.78  
 — -15.91

ZD-770-CDC13-B (de)

```

NAME      ZD-770-CDC13-B (de)
EXPNO     1
PROCNO    1
Date_     20140916
Time      20.29
INSTRUM   spect
PROBHD    5 mm PABBO BB-
PULPROG   zgdc
TD        65536
SOLVENT   CDC13
NS         4
DS         0
SWH       25510.203 Hz
FIDRES    0.389255 Hz
AQ        1.2845556 sec
RG         287
DW        19.600 usec
DE         6.50 usec
TE        295.8 K
D1        5.0000000 sec
D11       0.0300000 sec
TD0       1
  
```

```

===== CHANNEL f1 =====
NUC1      11B
P1        7.60 usec
PL1       -3.00 dB
PL1W      55.13059616 W
SFO1      128.3968556 MHz
  
```

```

===== CHANNEL f2 =====
CPDPRG2   waltz16
NUC2       1H
PCPD2     90.00 usec
PL2       -1.00 dB
PL12      15.16 dB
PL2W      13.56617069 W
PL12W     0.32844096 W
SFO2      400.1916008 MHz
SI        32768
SF        128.3968847 MHz
WDW       EM
SSB       0
LB        3.00 Hz
GB        0
PC        1.40
  
```

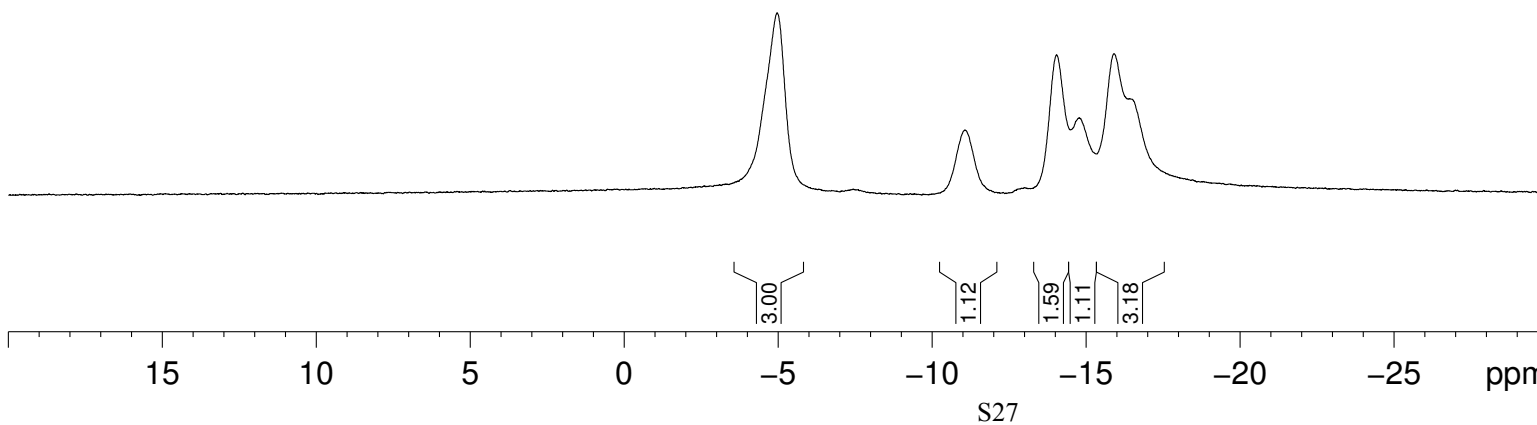



| -4.54  
 | -5.61  
  
 | -10.46  
 | -11.67  
 | -13.42  
 | -14.71  
 | -15.32  
 | -16.51

ZD-770-CDC13-B (c)

```

NAME      ZD-770-CDC13-B (c)
EXPNO     1
PROCNO    1
Date_     20140916
Time      20.30
INSTRUM   spect
PROBHD    5 mm PABBO BB-
PULPROG   zg30
TD        65536
SOLVENT   CDC13
NS        8
DS        0
SWH       25510.203 Hz
FIDRES    0.389255 Hz
AQ        1.2845556 sec
RG        161
DW        19.600 usec
DE        6.50 usec
TE        295.5 K
D1        5.00000000 sec
TD0       1
  
```

```

===== CHANNEL f1 =====
NUC1      11B
P1        7.60 usec
PL1       -3.00 dB
PL1W      55.13059616 W
SFO1      128.3968556 MHz
SI        32768
SF        128.3968865 MHz
WDW       EM
SSB       0
LB        3.00 Hz
GB        0
PC        1.40
  
```

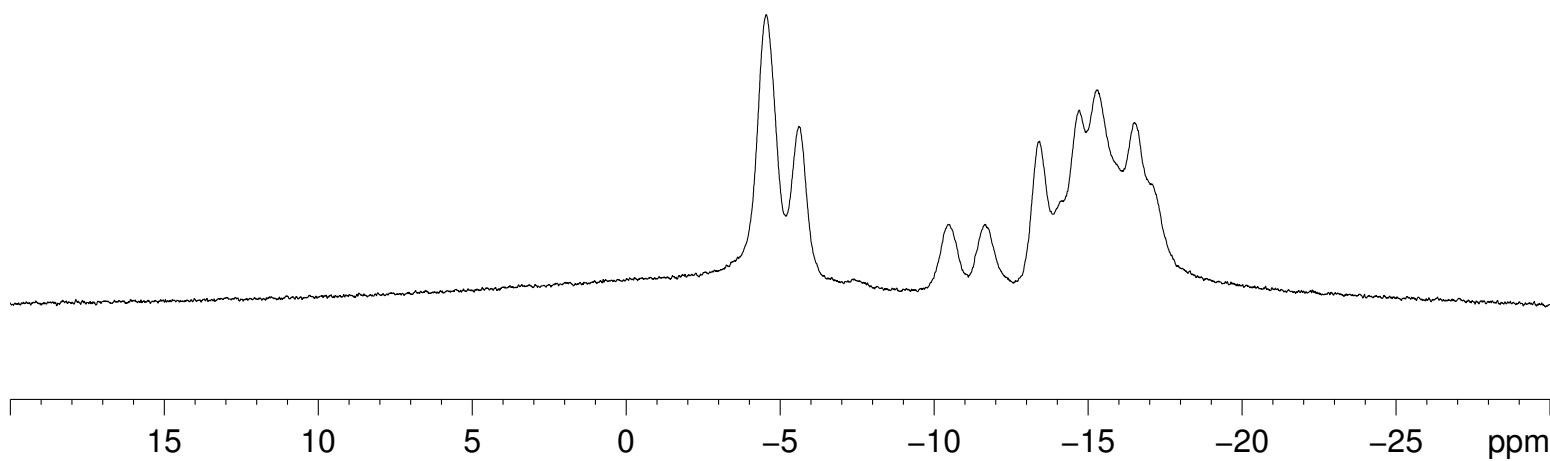

ZD-777-1-CDCl3-H

Bruker Advance III 400

```
NAME      ZD-777-1-CDCl3-H
EXPNO     1
PROCNO    1
Date_     20140917
Time      16.38
INSTRUM   spect
PROBHD    5 mm PADUL 13C
PULPROG   zg
TD        65536
SOLVENT   CDC13
NS        4
DS        0
SWH       10000.000 Hz
FIDRES    0.152588 Hz
AQ        3.2768500 sec
RG        144
DW        50.000 usec
DE        6.50 usec
TE        294.3 K
D1        1.00000000 sec
TD0       1
```

```
----- CHANNEL f1 -----
NUC1      1H
P1        14.83 usec
PL1       0.00 dB
PL1W      8.31434441 W
SFO1      400.1318000 MHz
SI        65536
SF        400.1300082 MHz
WDW       EM
SSB       0
LB        0.30 Hz
GB        0
PC        1.00
```

7.260

3.949

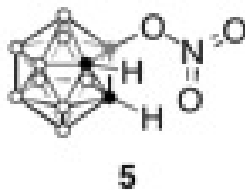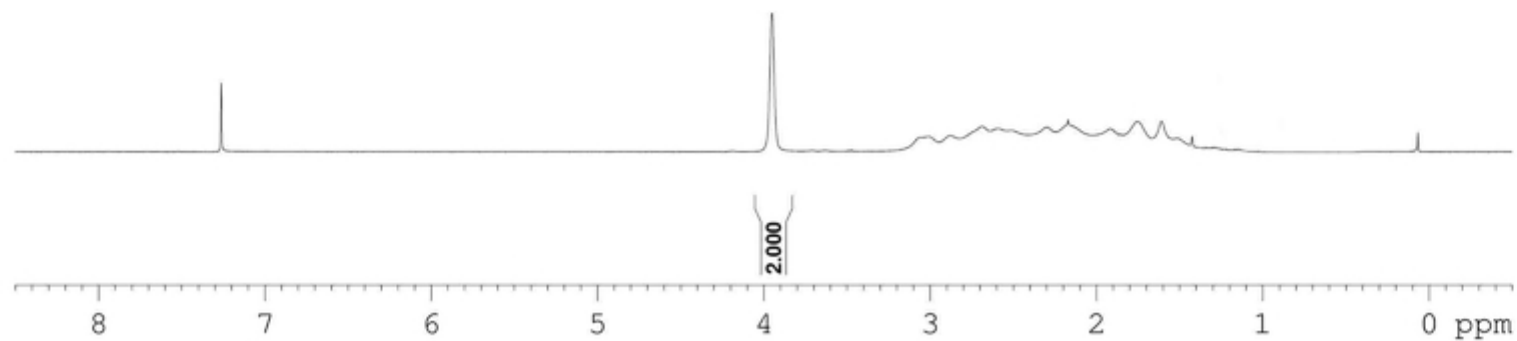

ZD-777-1-CDC13-C

Bruker Advance III 400

NAME ZD-777-1-CDC13-C  
EXPNO 1  
PROCNO 1  
Date\_ 20140917  
Time 16.42  
INSTRUM spect  
PROBHD 5 mm PADUL 13C  
PULPROG zgdc  
TD 131072  
SOLVENT CDC13  
NS 128  
DS 0  
SWH 29761.904 Hz  
FIDRES 0.227065 Hz  
AQ 2.2020595 sec  
RG 203  
DW 16.800 usec  
DE 6.50 usec  
TE 294.3 K  
D1 1.00000000 sec  
D11 0.03000000 sec  
TD0 1

==== CHANNEL f1 =====  
NUC1 13C  
P1 9.68 usec  
PL1 -0.60 dB  
PL1W 41.24164963 W  
SFO1 100.6227690 MHz

==== CHANNEL f2 =====  
CPDPRG2 waltz16  
NUC2 1H  
PCPD2 90.00 usec  
PL2 0.00 dB  
PL12 15.66 dB  
PL2W 8.31434441 W  
PL12W 0.22585411 W  
SFO2 400.1320007 MHz  
SI 131072  
SF 100.6127559 MHz  
WDM EM  
SSB 0  
LB 1.00 Hz  
GB 0  
PC 1.40

77.478  
77.160  
76.842

55.715

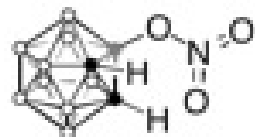

5

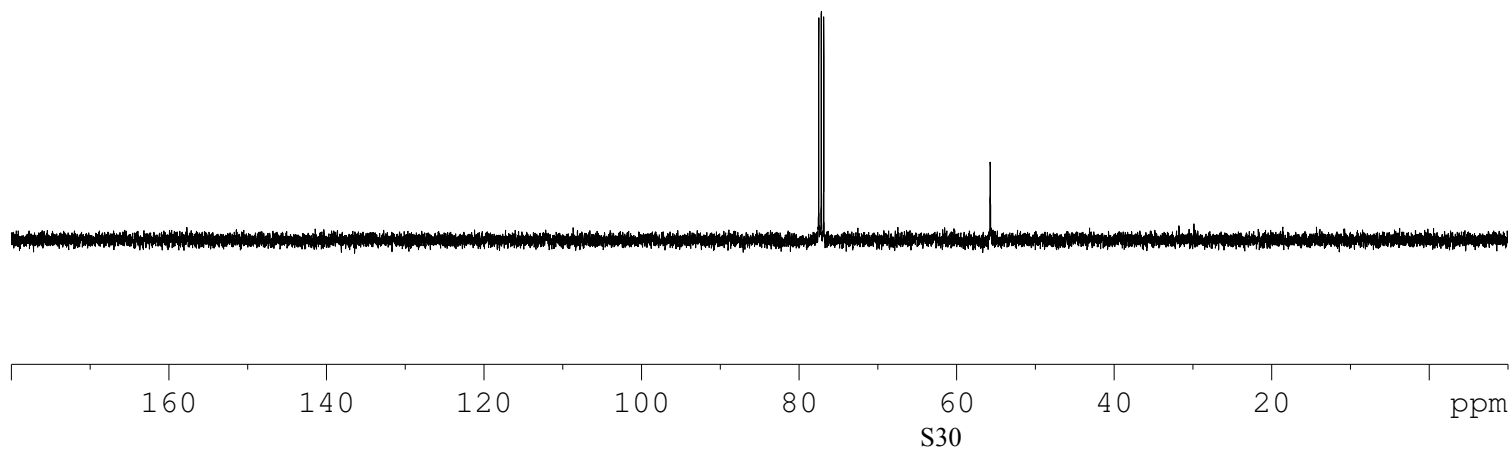

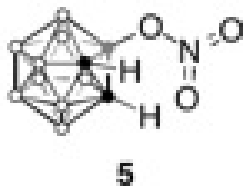

-3.74  
 -4.18  
 -10.40  
 -13.99  
 -15.05

ZD-777-1-CDC13-B (de)

```

NAME      ZD-777-1-CDC13-B (de)
EXPNO     1
PROCNO    1
Date_     20140917
Time      16.56
INSTRUM   spect
PROBHD    5 mm PABBO BB-
PULPROG   zgdc
TD        65536
SOLVENT   CDC13
NS        12
DS        0
SWH       25510.203 Hz
FIDRES    0.389255 Hz
AQ        1.2845556 sec
RG        287
DW        19.600 usec
DE        6.50 usec
TE        296.4 K
D1        5.0000000 sec
D11       0.03000000 sec
TD0       1
  
```

```

===== CHANNEL f1 =====
NUC1      11B
P1        7.60 usec
PL1       -3.00 dB
PL1W      55.13059616 W
SFO1      128.3968556 MHz
  
```

```

===== CHANNEL f2 =====
CPDPRG2   waltz16
NUC2      1H
PCPD2     90.00 usec
PL2       -1.00 dB
PL12      15.16 dB
PL2W      13.56617069 W
PL12W     0.32844096 W
SFO2      400.1916008 MHz
SI        32768
SF        128.3968847 MHz
WDW       EM
SSB       0
LB        3.00 Hz
GB        0
PC        1.40
  
```

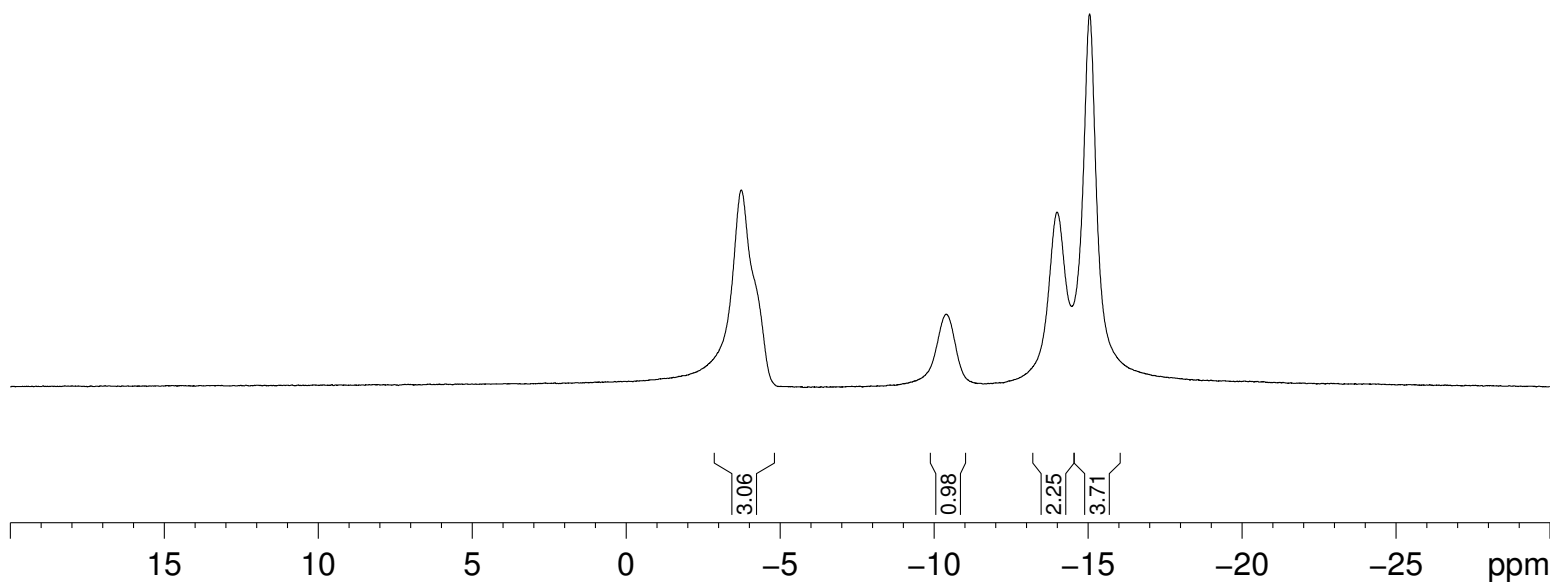

S31



— -3.15  
 — -4.27  
 — -9.82  
 — -11.03  
 — -13.39  
 — -14.49  
 — -15.73

ZD-777-1-CDC13-B (c)

```

NAME      ZD-777-1-CDC13-B (c)
EXPNO     1
PROCNO    1
Date_     20140917
Time      16.58
INSTRUM   spect
PROBHD    5 mm PABBO BB-
PULPROG   zg30
TD        65536
SOLVENT   CDC13
NS        16
DS        0
SWH       25510.203 Hz
FIDRES    0.389255 Hz
AQ        1.2845556 sec
RG        161
DW        19.600 usec
DE        6.50 usec
TE        296.0 K
D1        5.00000000 sec
TD0       1
  
```

```

===== CHANNEL f1 =====
NUC1      11B
P1        7.60 usec
PL1       -3.00 dB
PL1W      55.13059616 W
SFO1      128.3968556 MHz
SI        32768
SF        128.3968865 MHz
WDW       EM
SSB       0
LB        3.00 Hz
GB        0
PC        1.40
  
```

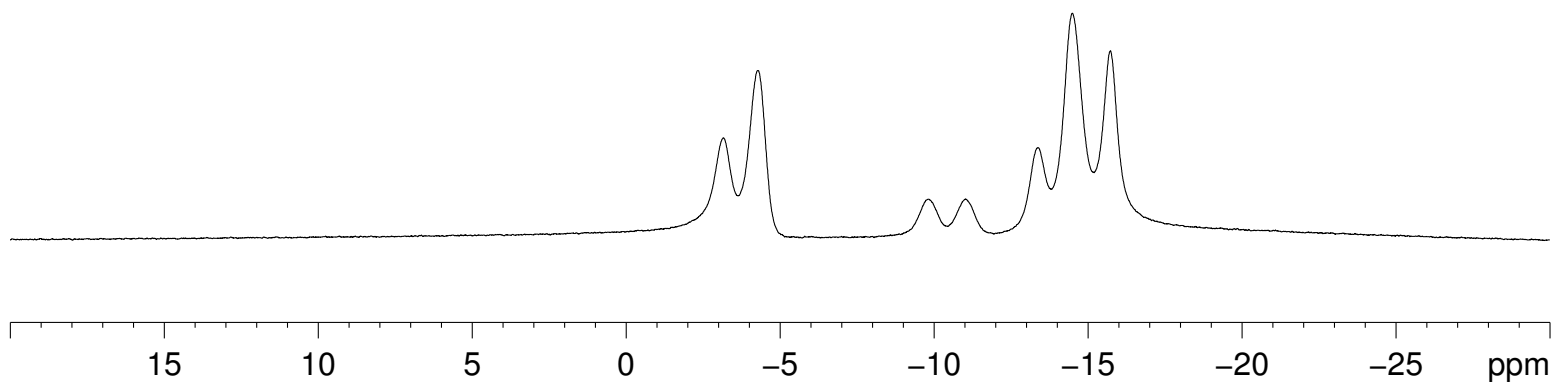



7.261

3.888

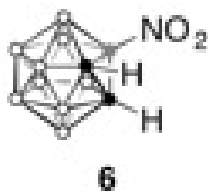

```
NAME      ZD-777-2-CDC13-H
EXPNO     1
PROCNO    1
Date_     20140918
Time_     17.21
INSTRUM   spect
PROBHD    5 mm PADUL 13C
PULPROG   zg
TD         65536
SOLVENT   CDC13
NS         4
DS         0
SWH       10000.000 Hz
FIDRES    0.152588 Hz
AQ         3.2768500 sec
RG         144
DW         50.000 usec
DE         6.50 usec
TE         294.3 K
D1         1.00000000 sec
TDO        1
```

```
----- CHANNEL f1 -----
NUC1      1H
P1         14.83 usec
PL1        0.00 dB
PL1W       8.31434441 W
SFO1      400.1318000 MHz
SI         65536
SF         400.1300082 MHz
WDW        EM
SSB        0
LB         0.30 Hz
GB         0
PC         1.00
```

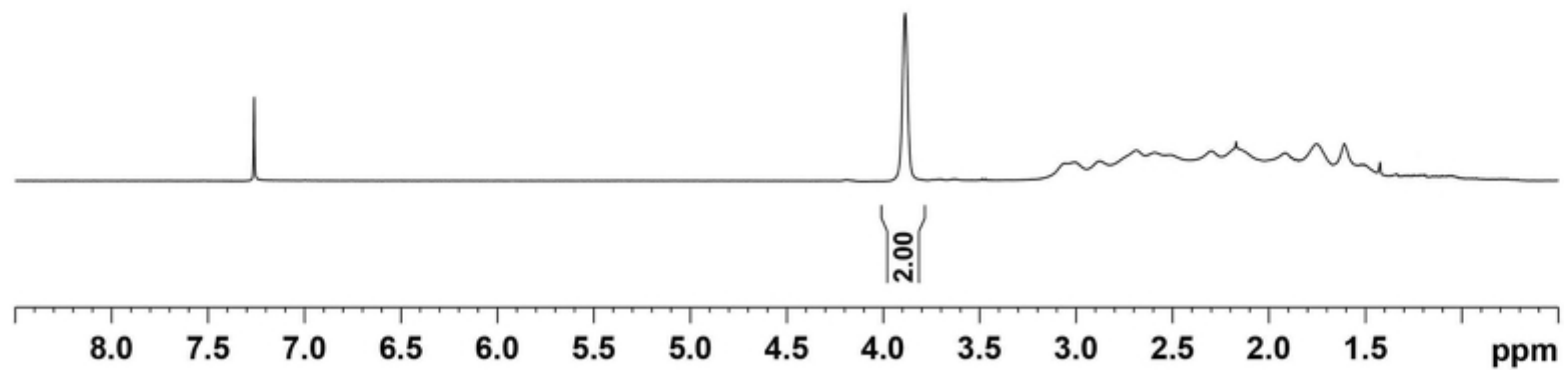

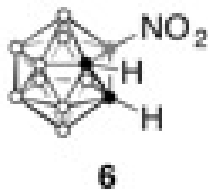

77.478  
77.160  
76.841  
55.010

```

NAME      ZD-777-2-CDCl3-C
EXPNO     1
PROCNO    1
Date_     20140918
Time      17.52
INSTRUM   spect
PROBHD    5 mm PADUL 13C
PULPROG   zgdc
TD         131072
SOLVENT   CDCl3
NS         128
DS         0
SWH        29761.904 Hz
FIDRES     0.227065 Hz
AQ         2.2020595 sec
RG         203
DW         16.800 usec
DE         6.50 usec
TE         294.3 K
D1         1.00000000 sec
D11        0.03000000 sec
TDO       1
  
```

```

----- CHANNEL f1 -----
NUC1      13C
P1        9.68 usec
PL1       -0.60 dB
PL1W      41.24164963 W
SFO1      100.6227690 MHz
  
```

```

----- CHANNEL f2 -----
CPDPRG2   waltz16
NUC2      1H
PCPD2     90.00 usec
PL2        0.00 dB
PL12      15.66 dB
PL2W      8.31434441 W
PL12W     0.22585411 W
SFO2      400.1320007 MHz
SI         131072
SF        100.6127559 MHz
WDW        EM
SSB         0
LB          1.00 Hz
GB          0
PC          1.40
  
```

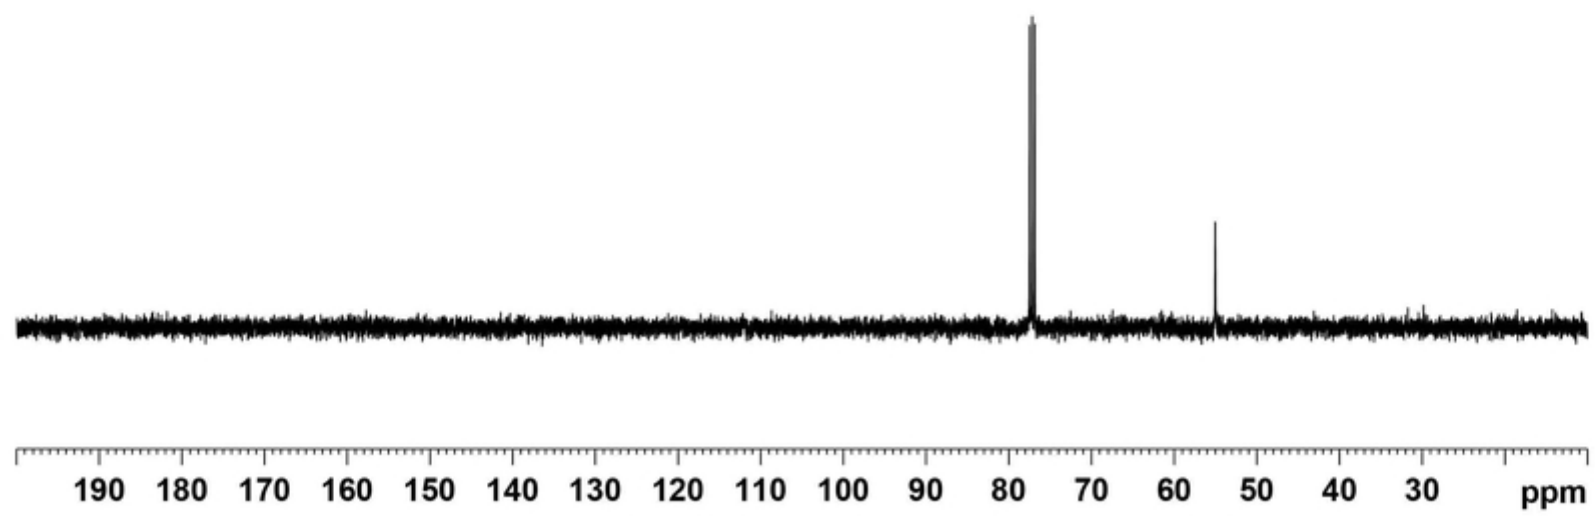

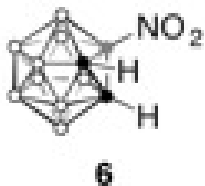

— -3.530  
 — -10.197  
 — -13.786  
 — -14.846

```

NAME      ZD-777-2-CDCl3-B(de)
EXPNO     1
PROCNO    1
Date_     20140918
Time      18.33
INSTRUM   spect
PROBHD    5 mm PABBO BB-
PULPROG   zgdc
TD        65536
SOLVENT   CDCl3
NS        12
DS        0
SWH       25510.203 Hz
FIDRES    0.389255 Hz
AQ        1.2845556 sec
RG        287
DW        19.600 usec
DE        6.50 usec
TE        296.4 K
D1        5.00000000 sec
D11       0.03000000 sec
TD0       1
  
```

```

===== CHANNEL f1 =====
NUC1      11B
P1        7.60 usec
PL1       -3.00 dB
PL1W     55.13059616 W
SFO1     128.3968556 MHz
  
```

```

===== CHANNEL f2 =====
CPDPRG2   waltz16
NUC2      1H
PCPD2     90.00 usec
PL2       -1.00 dB
PL12      15.16 dB
PL2W     13.56617069 W
PL12W    0.32844096 W
SFO2     400.1916008 MHz
SI        32768
SF        128.3968582 MHz
WDW       EM
SSB       0
LB        3.00 Hz
GB        0
PC        1.40
  
```

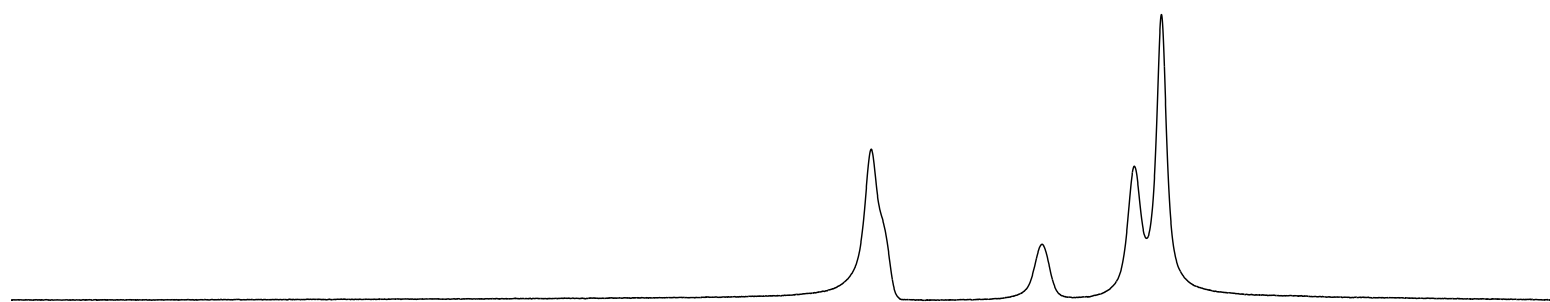

25 20 15 10 5 0 -5 -10 -15 -20 -25 ppm

3.05  
 1.09  
 2.20  
 3.66

S35



— -2.895  
 — -4.031  
  
 — -9.562  
 — -10.769  
  
 — -13.129  
 — -14.234  
 — -15.471

```

NAME      ZD-777-2-CDCl3-B(c)
EXPNO    1
PROCNO   1
Date_    20140918
Time     18.34
INSTRUM  spect
PROBHD   5 mm PABBO BB-
PULPROG  zg30
TD       65536
SOLVENT  CDCl3
NS       16
DS       0
SWH      25510.203 Hz
FIDRES   0.389255 Hz
AQ       1.2845556 sec
RG       161
DW       19.600 usec
DE       6.50 usec
TE       296.0 K
D1       5.00000000 sec
TD0      1
  
```

```

===== CHANNEL f1 =====
NUC1     11B
P1       7.60 usec
PL1     -3.00 dB
PL1W     55.13059616 W
SFO1    128.3968556 MHz
SI       32768
SF       128.3968533 MHz
WDW      EM
SSB      0
LB       3.00 Hz
GB       0
PC       1.40
  
```

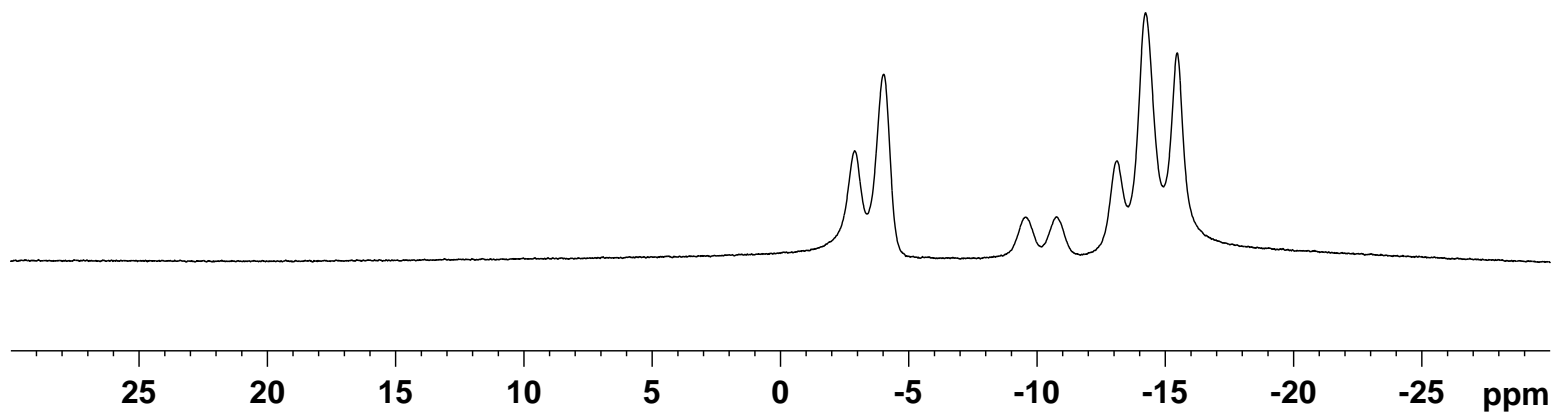

7.260

3.607

ZD-3-N3-CDC13-H

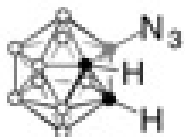

7

Current Data Parameters  
NAME ZD-3-N3-CDC13-H  
EXPNO 1  
PROCNO 1

F2 - Acquisition Parameters  
Date\_ 20160126  
Time 21.47 h  
INSTRUM spect  
PROBHD Z824601\_0021 (  
PULPROG zg  
TD 65536  
SOLVENT CDC13  
NS 8  
DS 0  
SWH 8012.820 Hz  
FIDRES 0.122266 Hz  
AQ 4.0894465 sec  
RG 64  
DW 62.400 usec  
DE 6.50 usec  
TE 294.1 K  
D1 1.00000000 sec  
TD0 1  
SFO1 400.1316005 MHz  
NUC1 1H  
P1 15.00 usec  
PLW1 8.31000042 W

F2 - Processing parameters  
SI 65536  
SF 400.1300098 MHz  
WDW EM  
SSB 0  
LB 0.30 Hz  
GB 0  
PC 1.00

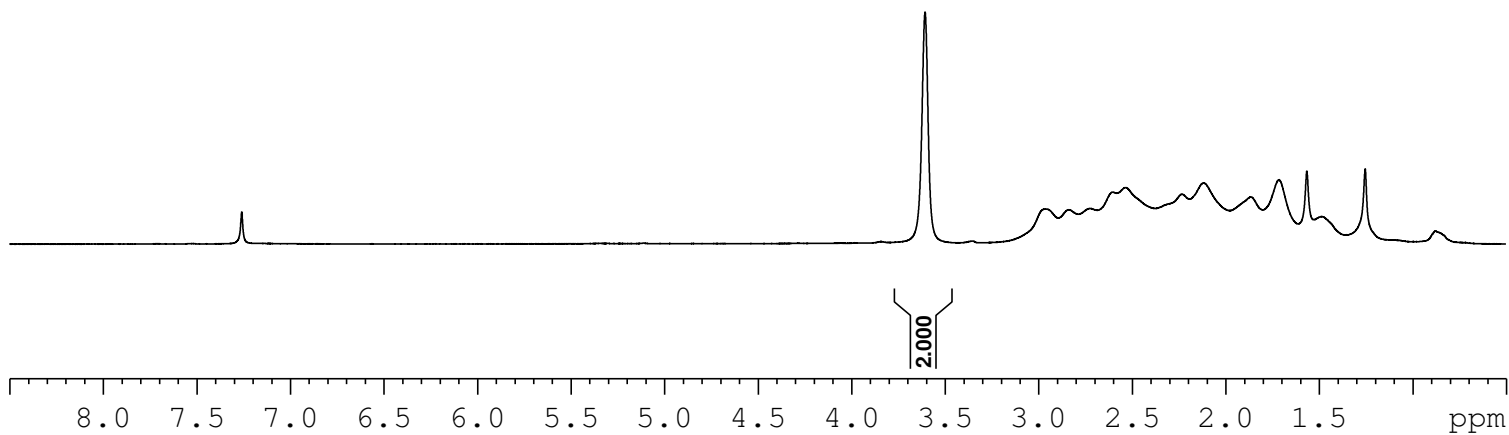

S37

ZD-3-N3-CDC13-C

77.478  
77.160  
76.843

56.013

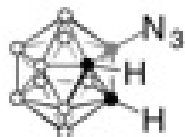

7

Current Data Parameters  
NAME ZD-3-N3-CDC13-C  
EXPNO 1  
PROCNO 1

F2 - Acquisition Parameters  
Date\_ 20160126  
Time 21.50 h  
INSTRUM spect  
PROBHD Z824601\_0021 (  
PULPROG zgdc  
TD 131072  
SOLVENT CDC13  
NS 80  
DS 0  
SWH 25252.525 Hz  
FIDRES 0.192661 Hz  
AQ 2.5952256 sec  
RG 203  
DW 19.800 usec  
DE 6.50 usec  
TE 294.4 K  
D1 1.00000000 sec  
D11 0.03000000 sec  
TD0 1  
SFO1 100.6227690 MHz  
NUC1 13C  
P1 9.50 usec  
PLW1 41.25000000 W  
SFO2 400.1320007 MHz  
NUC2 1H  
CPDPRG[2] waltz16  
PCPD2 90.00 usec  
PLW2 8.31000042 W  
PLW12 0.23083000 W

F2 - Processing parameters  
SI 131072  
SF 100.6127569 MHz  
WDW EM  
SSB 0  
LB 3.00 Hz  
GB 0  
PC 1.40

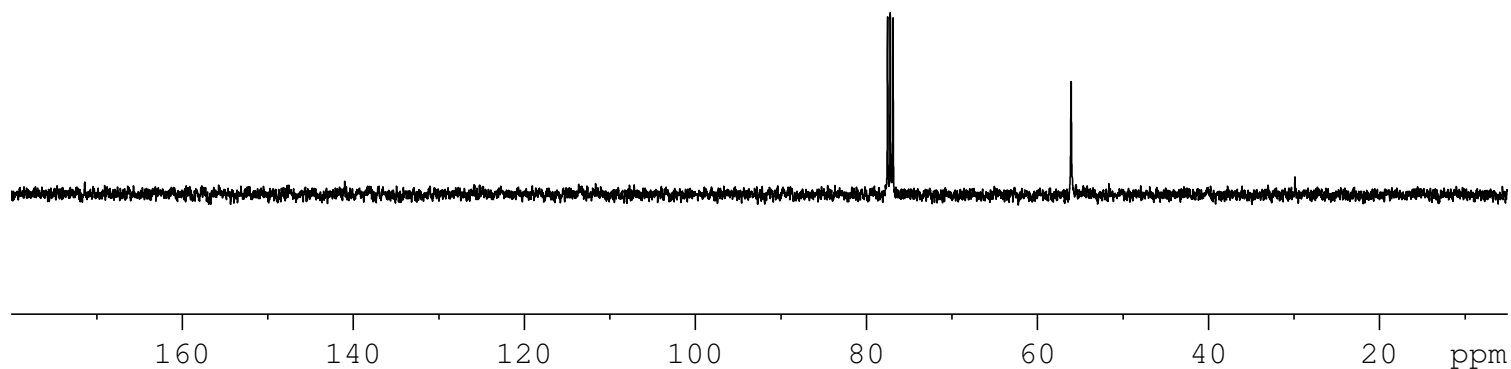

S38

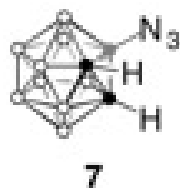

— -3.79  
 — -5.11  
 — -11.07  
 — -14.24  
 — -14.89

ZD-3-N3-CDCl3-B (de)

Current Data Parameters  
 NAME ZD-3-N3-CDCl3-B (de)  
 EXPNO 1  
 PROCNO 1

F2 - Acquisition Parameters  
 Date\_ 20160126  
 Time 22.01 h  
 INSTRUM spect  
 PROBHD Z108618\_0257 (  
 PULPROG zgdc  
 TD 65536  
 SOLVENT CD2Cl2  
 NS 8  
 DS 4  
 SWH 24038.461 Hz  
 FIDRES 0.366798 Hz  
 AQ 1.3631488 sec  
 RG 203  
 DW 20.800 usec  
 DE 6.50 usec  
 TE 296.2 K  
 D1 2.0000000 sec  
 D11 0.0300000 sec  
 TD0 1  
 SFO1 128.4096890 MHz  
 NUC1 11B  
 P1 7.50 usec  
 PLW1 55.09999847 W  
 SFO2 400.2316009 MHz  
 NUC2 1H  
 CPDPRG[2] waltz16  
 PCPD2 90.00 usec  
 PLW2 13.56000042 W  
 PLW12 0.27428001 W

F2 - Processing parameters  
 SI 32768  
 SF 128.4097615 MHz  
 WDW EM  
 SSB 0  
 LB 1.00 Hz  
 GB 0  
 PC 1.40

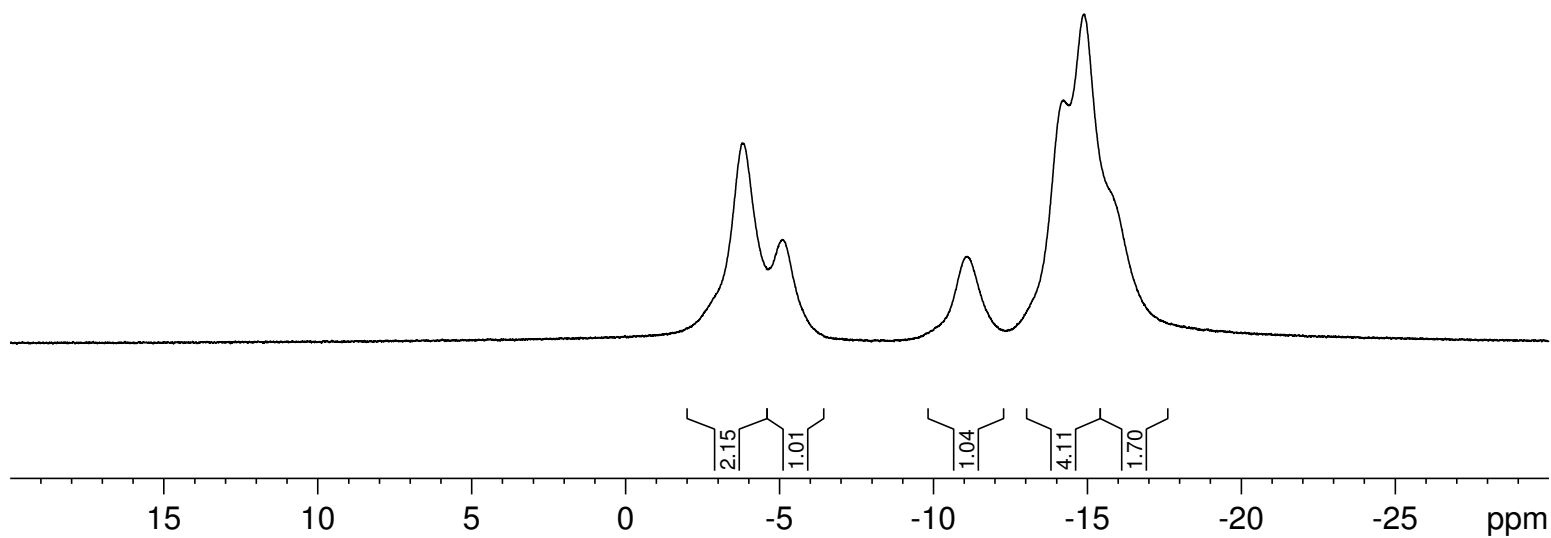



|       |       |       |        |        |        |
|-------|-------|-------|--------|--------|--------|
| —     | —     | —     | —      | —      | —      |
| -3.05 | -4.23 | -4.82 | -10.35 | -11.50 | -14.46 |
| —     | —     | —     | —      | —      | —      |

ZD-3-N3-CDCl3-B (c)

Current Data Parameters  
 NAME ZD-3-N3-CDCl3-B (c)  
 EXPNO 1  
 PROCNO 1

F2 - Acquisition Parameters  
 Date\_ 20160126  
 Time 22.03 h  
 INSTRUM spect  
 PROBHD Z108618\_0257 (  
 PULPROG zg  
 TD 65536  
 SOLVENT CD2Cl2  
 NS 43  
 DS 2  
 SWH 24038.461 Hz  
 FIDRES 0.366798 Hz  
 AQ 1.3631488 sec  
 RG 101  
 DW 20.800 usec  
 DE 6.50 usec  
 TE 295.8 K  
 D1 2.0000000 sec  
 TD0 1  
 SFO1 128.4096890 MHz  
 NUC1 11B  
 P1 7.50 usec  
 PLW1 55.09999847 W

F2 - Processing parameters  
 SI 32768  
 SF 128.4097430 MHz  
 WDW EM  
 SSB 0  
 LB 1.00 Hz  
 GB 0  
 PC 1.40

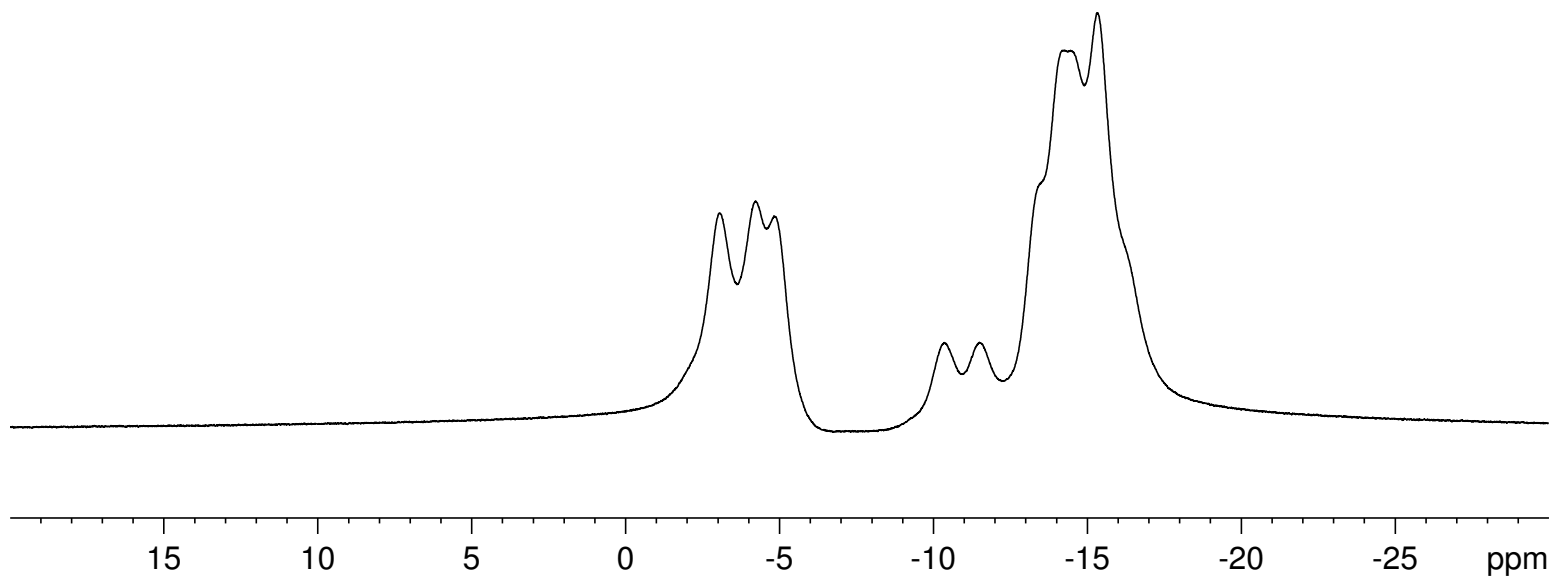



7.260

4.206

ZD-3-NH2-CDCI3-H

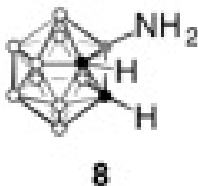

Current Data Parameters  
NAME ZD-3-NH2-CDCI3-H  
EXPNO 1  
PROCNO 1

F2 - Acquisition Parameters  
Date\_ 20150321  
Time 11.45 h  
INSTRUM spect  
PROBHD Z108618\_0257 (  
PULPROG zg30  
TD 65536  
SOLVENT CDCl3  
NS 8  
DS 2  
SWH 8012.820 Hz  
FIDRES 0.122266 Hz  
AQ 4.0894465 sec  
RG 203  
DW 62.400 usec  
DE 6.50 usec  
TE 294.7 K  
D1 1.0000000 sec  
TD0 1  
SFO1 400.2324714 MHz  
NUC1 1H  
P1 12.80 usec  
PLW1 13.56000042 W

F2 - Processing parameters  
SI 65536  
SF 400.2300094 MHz  
WDW EM  
SSB 0  
LB 0.30 Hz  
GB 0  
PC 1.00

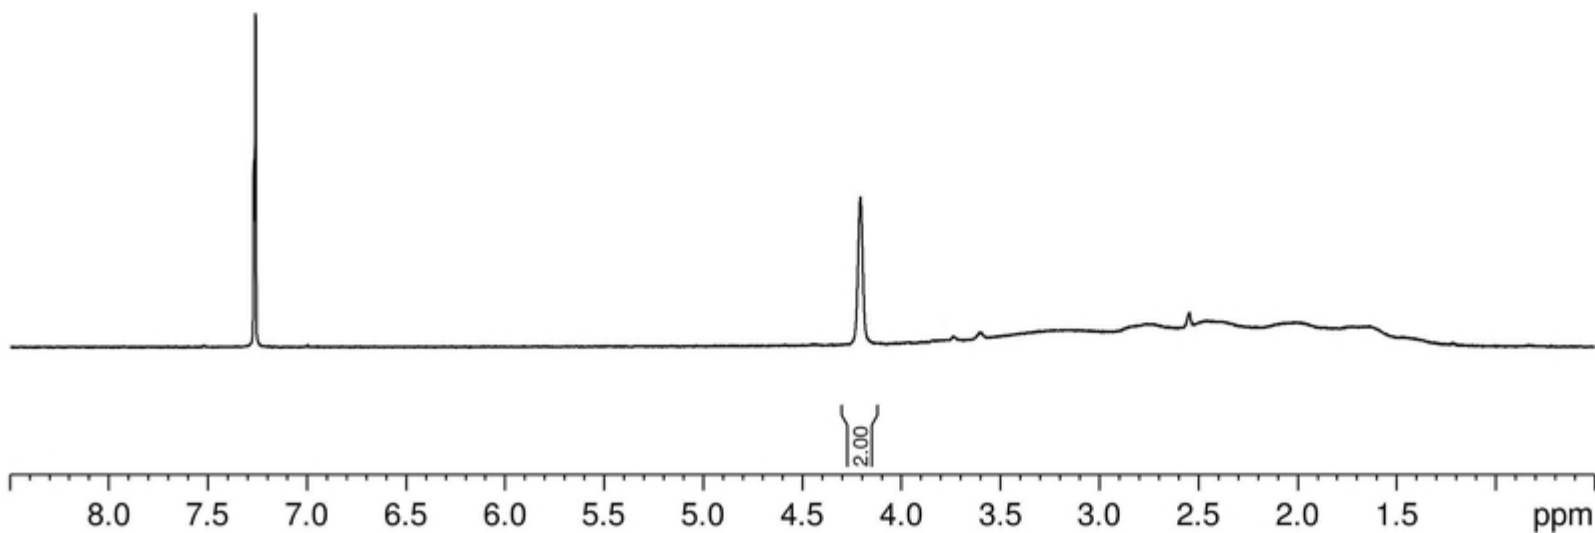

ZD-774-acetone-H

Bruker Advance III 400

NAME ZD-774-acetone-H  
EXPNO 1  
PROCNO 1  
Date\_ 20140920  
Time 11.24  
INSTRUM spect  
PROBHD 5 mm PADUL 13C  
PULPROG zg  
TD 65536  
SOLVENT Acetone  
NS 16  
DS 0  
SWH 10000.000 Hz  
FIDRES 0.152588 Hz  
AQ 3.2768500 sec  
RG 144  
DW 50.000 usec  
DE 6.50 usec  
TE 294.3 K  
D1 1.00000000 sec  
TD0 1

----- CHANNEL f1 -----  
NUC1 1H  
P1 14.83 usec  
PL1 0.00 dB  
PL1W 8.31434441 W  
SFO1 400.1318000 MHz  
SI 65536  
SF 400.1300059 MHz  
WDW EM  
SSB 0  
LB 0.30 Hz  
GB 0  
PC 1.00

4.877  
4.731  
4.707

2.061  
2.055  
2.050  
2.045  
2.039

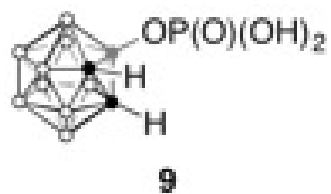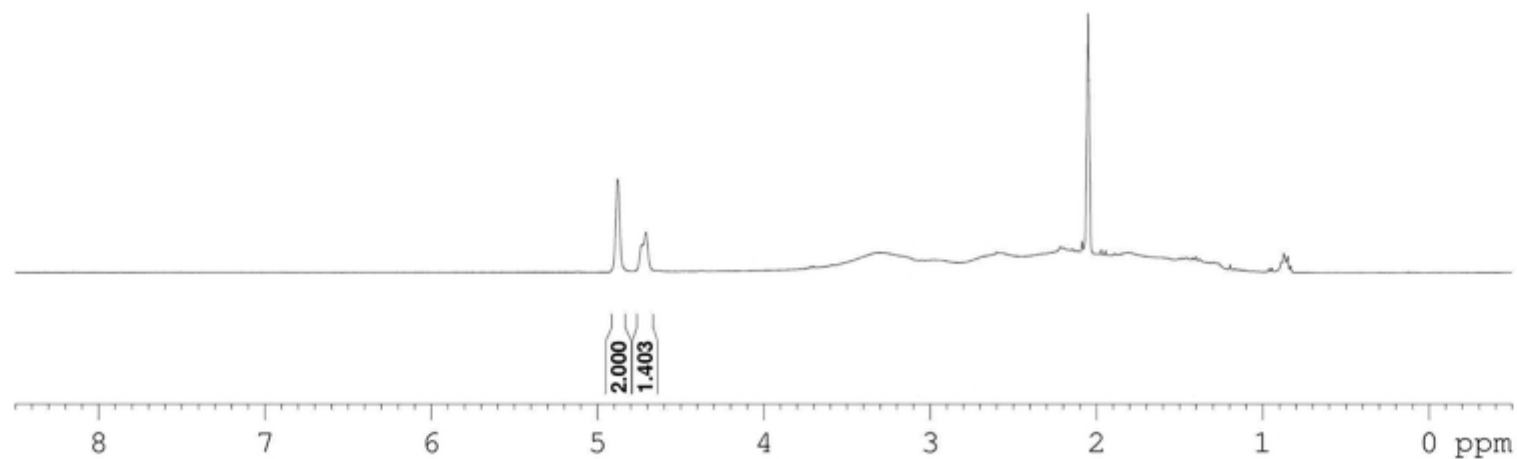

206.179

58.534

30.417  
30.224  
30.032  
29.840  
29.647  
29.455  
29.262

ZD-774-acetone-C

Bruker Advance III 400

```

NAME      ZD-774-acetone-C
EXPNO     1
PROCNO    1
Date_     20140920
Time      11.29
INSTRUM   spect
PROBHD    5 mm PADUL 13C
PULPROG   zgdc
TD         131072
SOLVENT   Acetone
NS         800
DS         0
SWH        29761.904 Hz
FIDRES     0.227065 Hz
AQ         2.2020595 sec
RG         203
DW         16.800 usec
DE         6.50 usec
TE         294.7 K
D1         1.00000000 sec
D11        0.03000000 sec
TD0        1

```

```

----- CHANNEL f1 -----
NUC1      13C
P1        9.68 usec
PL1       -0.60 dB
PL1W      41.24164963 W
SFO1      100.6227690 MHz

```

```

----- CHANNEL f2 -----
CPDPRG2   waltz16
NUC2       1H
PCPD2     90.00 usec
PL2        0.00 dB
PL12       15.66 dB
PL2W      8.31434441 W
PL12W     0.22585411 W
SFO2      400.1320007 MHz
SI         131072
SF         100.6126791 MHz
WDW        EM
SSB         0
LB         1.00 Hz
GB         0
PC         1.40

```

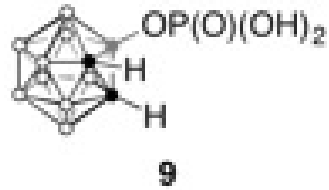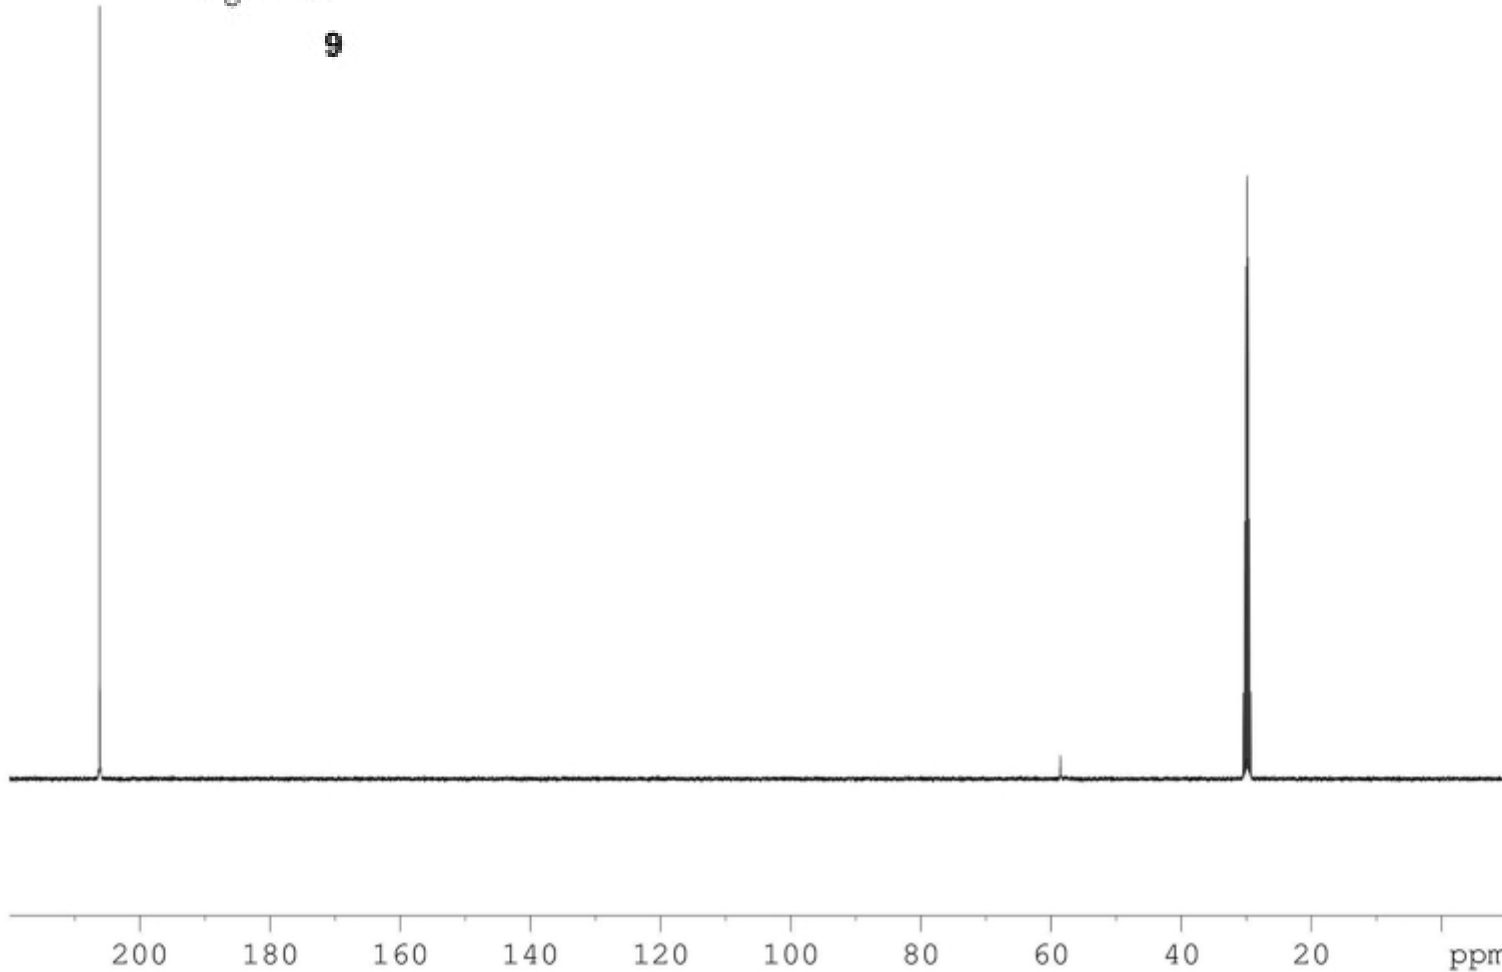

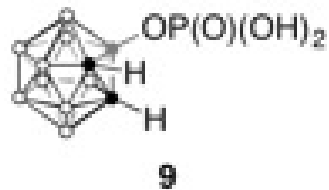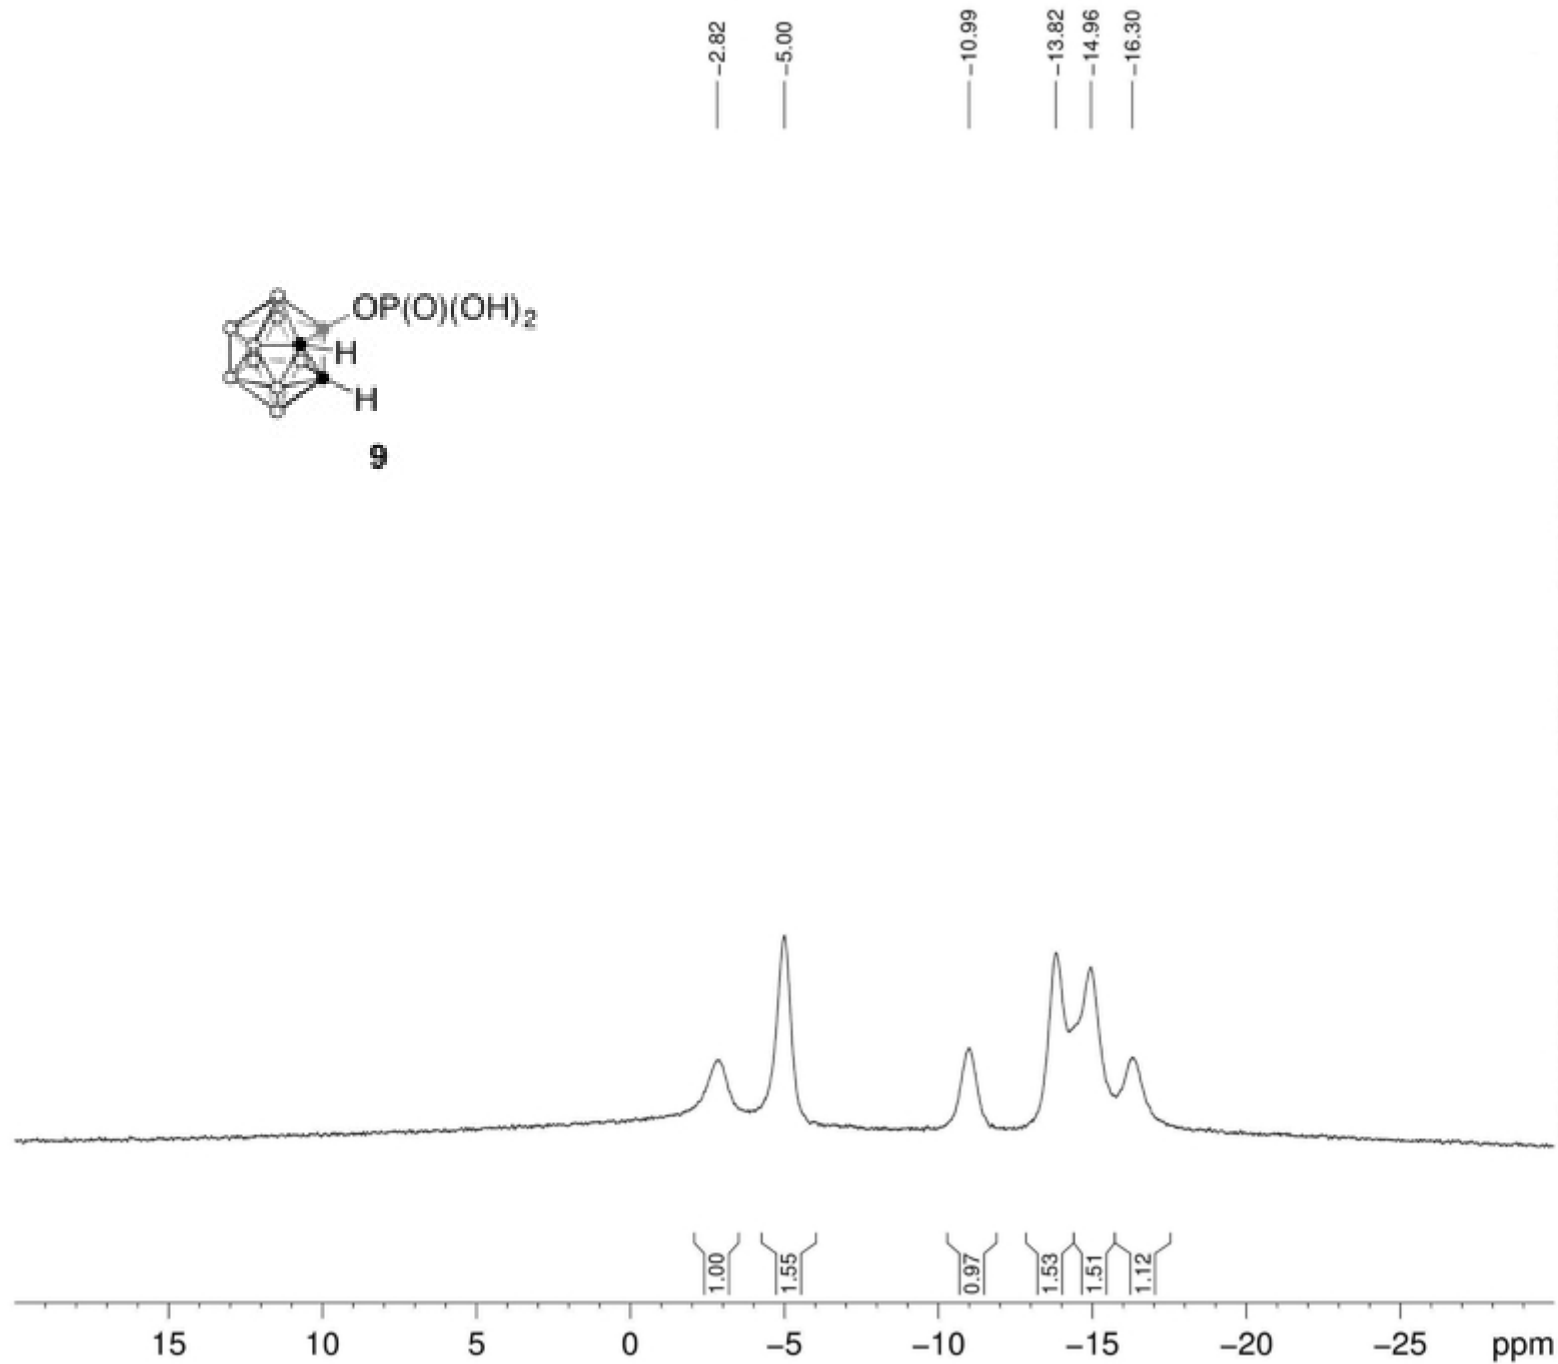

```

NAME      ZD-774-Acetone-B(de)
EXPNO     1
PROCNO    1
Date_     20141011
Time      10.54
INSTRUM   spect
PROBHD    5 mm PABBO BB-
PULPROG   zgdc
TD        65536
SOLVENT   Acetone
NS        8
DS        0
SWH       25510.203 Hz
FIDRES    0.389255 Hz
AQ        1.2845556 sec
RG        362
DW        19.600 usec
DE        6.50 usec
TE        299.1 K
D1        5.00000000 sec
D11       0.03000000 sec
TDO       1
  
```

```

===== CHANNEL f1 =====
NUC1      11B
P1        7.60 usec
PL1       -3.00 dB
PL1W      55.13059616 W
SFO1      128.3968556 MHz
  
```

```

===== CHANNEL f2 =====
CPDPRG2   waltz16
NUC2      1H
PCPD2     90.00 usec
PL2       -1.00 dB
PL12      15.16 dB
PL2W      13.56617069 W
PL12W     0.32844096 W
SFO2      400.1916008 MHz
SI        32768
SF        128.3968847 MHz
WDW       EM
SSB       0
LB        3.00 Hz
GB        0
PC        1.40
  
```



— -2.94  
 — -4.49  
 — -5.63  
 — -10.45  
 — -11.69  
 — -13.24  
 — -14.47  
 — -15.72  
 — -17.02

```

NAME      ZD-774-Acetone-B(c)
EXPNO     1
PROCNO    1
Date_     20141011
Time      10.55
INSTRUM   spect
PROBHD    5 mm PABBO BB-
PULPROG   zg30
TD         65536
SOLVENT   Acetone
NS         12
DS         0
SWH       25510.203 Hz
FIDRES    0.389255 Hz
AQ         1.2845556 sec
RG         161
DW         19.600 usec
DE         6.50 usec
TE         299.1 K
D1         5.00000000 sec
TDO        1
  
```

```

----- CHANNEL f1 -----
NUC1      11B
P1        7.60 usec
PL1       -3.00 dB
PL1W      55.13059616 W
SFO1      128.3968556 MHz
SI         32768
SF         128.3968865 MHz
WDW        EM
SSB        0
LB         3.00 Hz
GB         0
PC         1.40
  
```

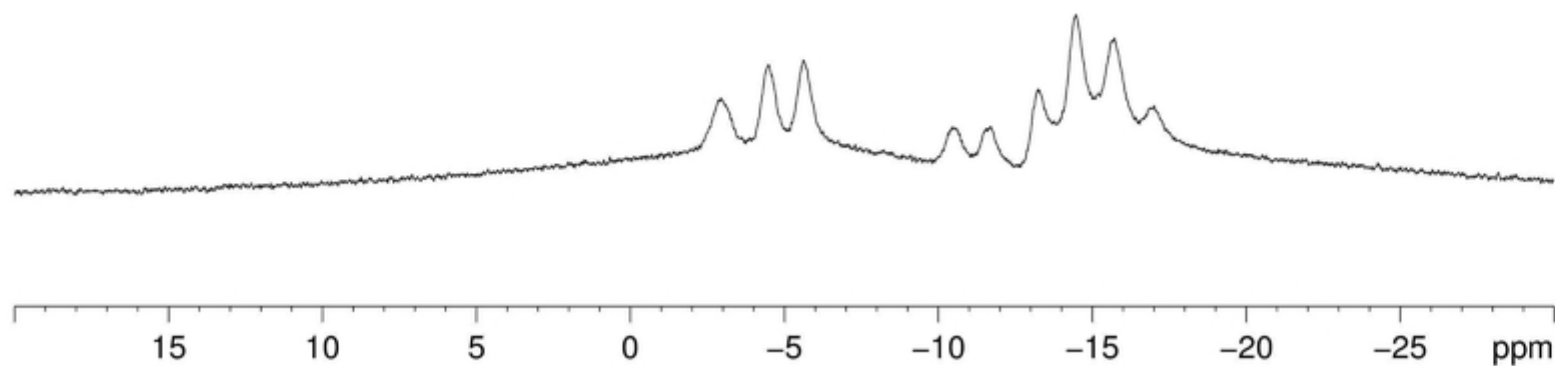

7.260

4.208

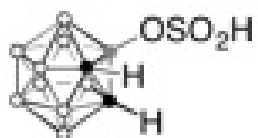

10

```
NAME      ZD-10-CDC13-H
EXPNO     1
PROCNO    1
Date_     20160129
Time_     22.59 h
INSTRUM   spect
PROBHD    Z824601_0021 (
PULPROG   zg
TD         65536
SOLVENT   CDC13
NS         16
DS         0
SWH       8012.820 Hz
FIDRES    0.122266 Hz
AQ        4.0894966 sec
RG         181
DW         62.400 usec
DE         6.50 usec
TE         294.0 K
D1         1.00000000 sec
TD0        1
SFO1      400.1316005 MHz
NUC1       1H
P1         15.00 usec
SI         65536
SF         400.1300098 MHz
WDW        EM
SSB        0
LB         0.30 Hz
GB         0
PC         1.00
```

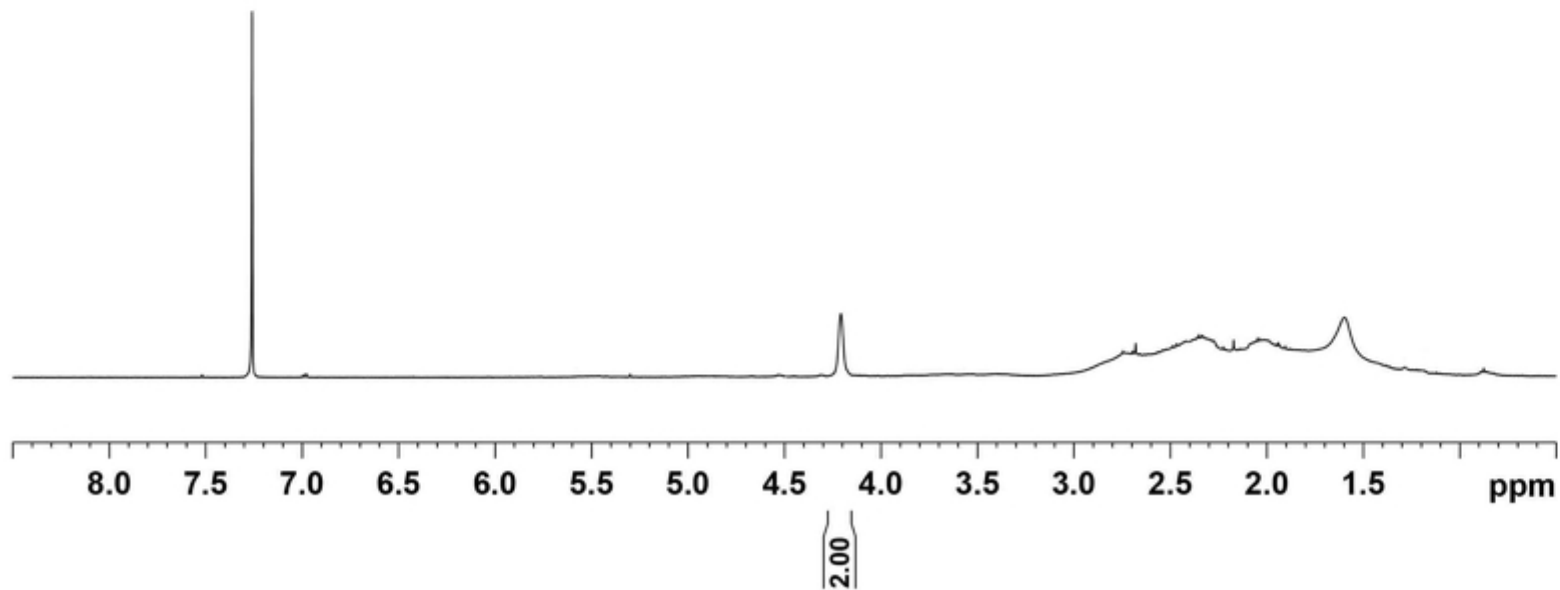

ZD-3-10-CDCl3-C

77.477  
77.160  
76.842  
58.792

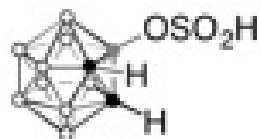

10

Current Data Parameters  
NAME 1  
EXPNO 1  
PROCNO 1

F2 - Acquisition Parameters  
Date\_ 20150915  
Time 12.22 h  
INSTRUM spect  
PROBHD Z824601\_0021 (   
PULPROG zgdc  
TD 131072  
SOLVENT CDC13  
NS 1180  
DS 0  
SWH 25252.525 Hz  
FIDRES 0.192661 Hz  
AQ 2.5952256 sec  
RG 203  
DW 19.800 usec  
DE 6.50 usec  
TE 294.0 K  
D1 1.00000000 sec  
D11 0.03000000 sec  
TD0 1  
SFO1 100.6227690 MHz  
NUC1 13C  
P1 9.50 usec  
PLW1 41.25000000 W  
SFO2 400.1320007 MHz  
NUC2 1H  
CPDPRG[2] waltz16  
PCPD2 90.00 usec  
PLW2 8.31000042 W  
PLW12 0.23083000 W

F2 - Processing parameters  
SI 131072  
SF 100.6127555 MHz  
WDW EM  
SSB 0  
LB 3.00 Hz  
GB 0  
PC 1.40

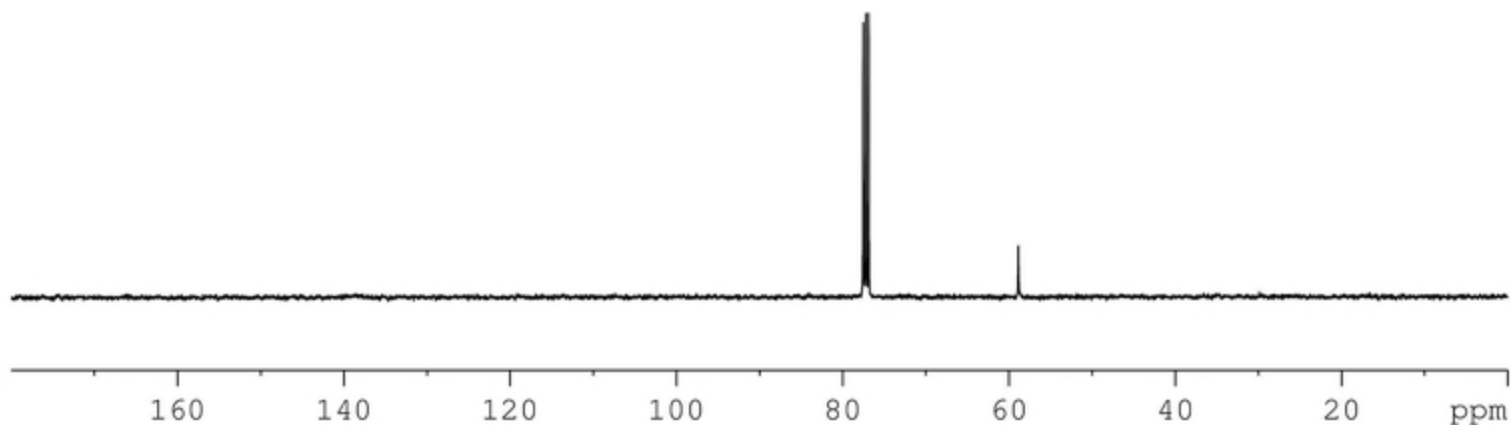

S47

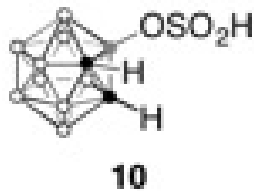

0.718  
 -3.512  
 -10.708  
 -13.100  
 -14.358  
 -17.563

```

NAME      ZD-10-CDC13-B(de)
EXPNO     1
PROCNO    1
Date_     20150730
Time      12.52
INSTRUM   spect
PROBHD    5 mm PABBO BB-
PULPROG   zgdc
TD         65536
SOLVENT   CDC13
NS         23
DS         0
SWH        25510.203 Hz
FIDRES     0.389255 Hz
AQ         1.2845556 sec
RG         362
DW         19.600 usec
DE         6.50 usec
TE         300.8 K
D1         5.00000000 sec
D11        0.03000000 sec
TD0        1
  
```

```

===== CHANNEL f1 =====
NUC1      11B
P1         7.60 usec
PL1        -3.00 dB
PL1W      55.13059616 W
SFO1      128.3968556 MHz
  
```

```

===== CHANNEL f2 =====
CPDPRG2   waltz16
NUC2       1H
PCPD2     90.00 usec
PL2        -1.00 dB
PL12       15.16 dB
PL2W      13.56617069 W
PL12W     0.32844096 W
SFO2      400.1916008 MHz
SI         32768
SF         128.3966840 MHz
WDW        EM
SSB         0
LB          3.00 Hz
GB          0
PC          1.40
  
```

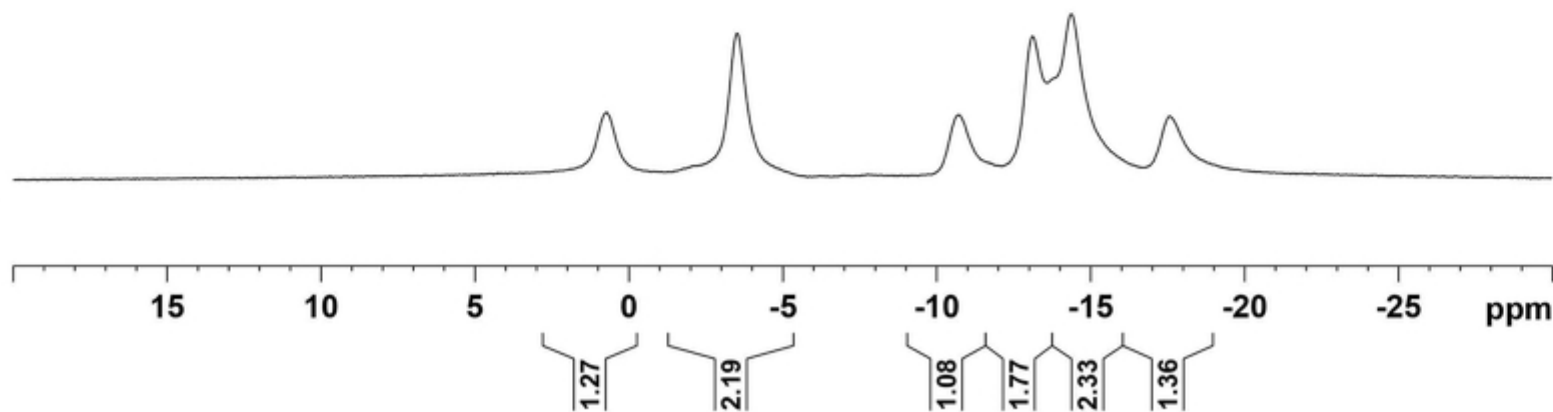



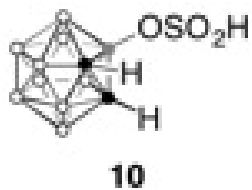

— 0.727  
 — -2.996  
 — -4.137  
 — -10.163  
 — -11.305  
 — -12.518  
 — -13.778  
 — -15.077  
 — -16.968  
 — -18.248

```

NAME      ZD-10-CDCl3-B(c)
EXPNO     1
PROCNO    1
Date_     20150730
Time      12.33
INSTRUM   spect
PROBHD    5 mm PABBO BB-
PULPROG   zg30
TD         65536
SOLVENT   CDC13
NS         12
DS         0
SWH       25510.203 Hz
FIDRES    0.389255 Hz
AQ        1.2845556 sec
RG         456
DW         19.600 usec
DE         6.50 usec
TE         300.3 K
D1         5.00000000 sec
TD0        1
  
```

```

===== CHANNEL f1 =====
NUC1      11B
P1         7.60 usec
PL1       -3.00 dB
PL1W      55.13059616 W
SF01      128.3968556 MHz
SI         32768
SF         128.3966897 MHz
WDW        EM
SSB         0
LB          3.00 Hz
GB          0
PC          1.40
  
```

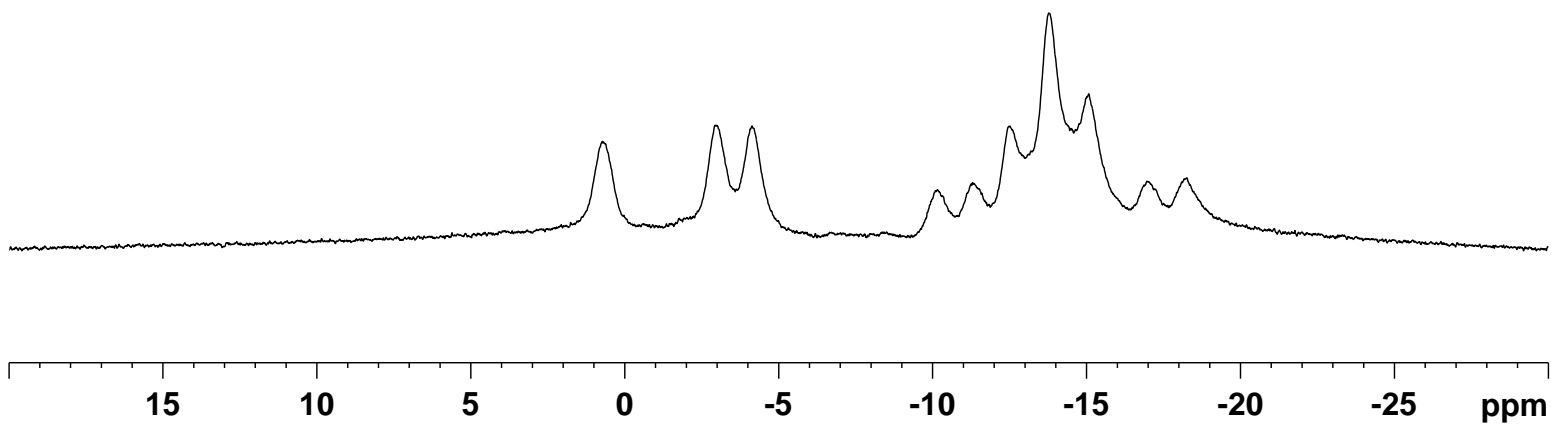

7.260

3.913

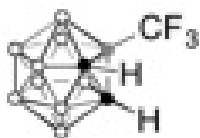

11

```
NAME      ZD-11-CDC13-H
EXPNO     1
PROCNO    1
Date_     20160127
Time_     10.10 h
INSTRUM   spect
PROBHD    Z824601_0021 (
PULPROG   zg
TD        65536
SOLVENT   CDC13
NS        16
DS        0
SWH       8012.820 Hz
FIDRES    0.122266 Hz
AQ        4.0894966 sec
RG        181
DW        62.400 usec
DE        6.50 usec
TE        294.0 K
D1        1.00000000 sec
TD0       1
SFO1      400.1316005 MHz
NUC1      1H
P1        15.00 usec
SI        65536
SF        400.1300098 MHz
WDW       EM
SSB       0
LB        0.30 Hz
GB        0
PC        1.00
```

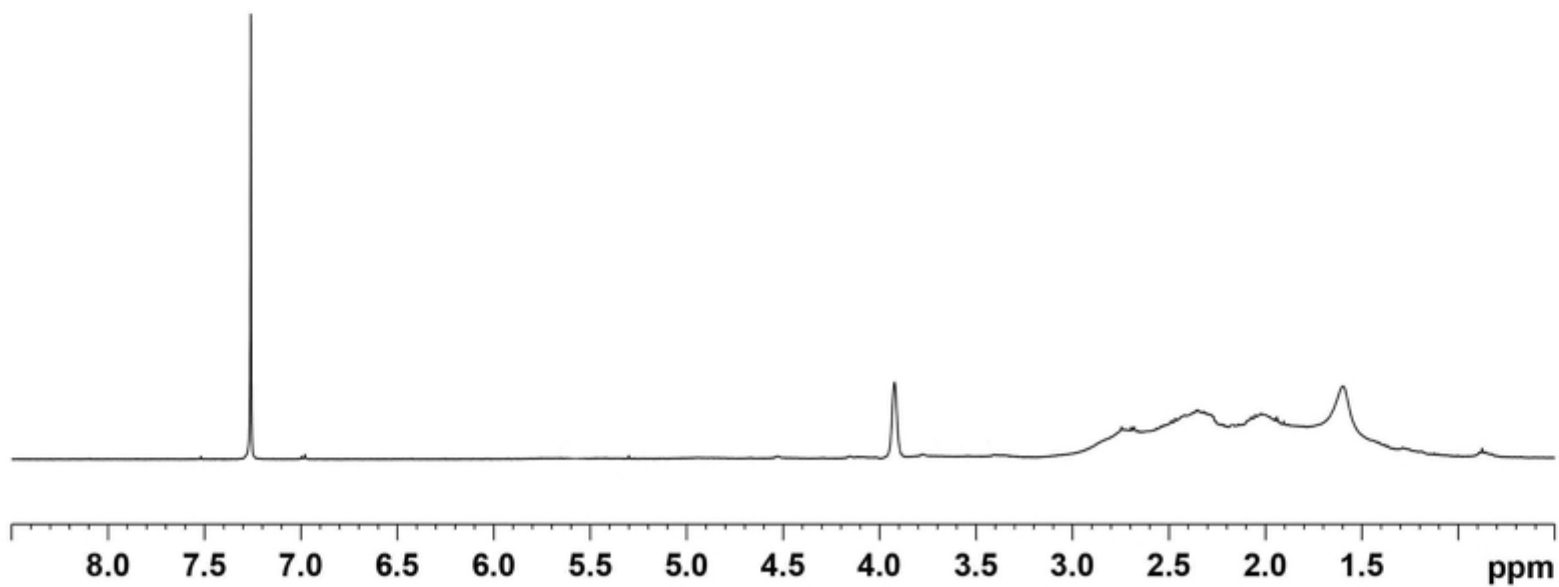

ZD-11-CDCl3-C

77.477  
77.160  
76.842  
58.822

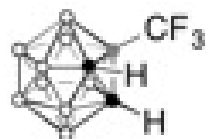

11

Current Data Parameters  
NAME 1  
EXPNO 1  
PROCNO 1

F2 - Acquisition Parameters  
Date\_ 20151027  
Time 13.12 h  
INSTRUM spect  
PROBHD Z824601\_0021 (   
PULPROG zgdc  
TD 131072  
SOLVENT CDC13  
NS 1180  
DS 0  
SWH 25252.525 Hz  
FIDRES 0.192661 Hz  
AQ 2.5952256 sec  
RG 203  
DW 19.800 usec  
DE 6.50 usec  
TE 294.0 K  
D1 1.00000000 sec  
D11 0.03000000 sec  
TD0 1  
SFO1 100.6227690 MHz  
NUC1 13C  
P1 9.50 usec  
PLW1 41.25000000 W  
SFO2 400.1320007 MHz  
NUC2 1H  
CPDPRG[2] waltz16  
PCPD2 90.00 usec  
PLW2 8.31000042 W  
PLW12 0.23083000 W

F2 - Processing parameters  
SI 131072  
SF 100.6127555 MHz  
WDW EM  
SSB 0  
LB 3.00 Hz  
GB 0  
PC 1.40

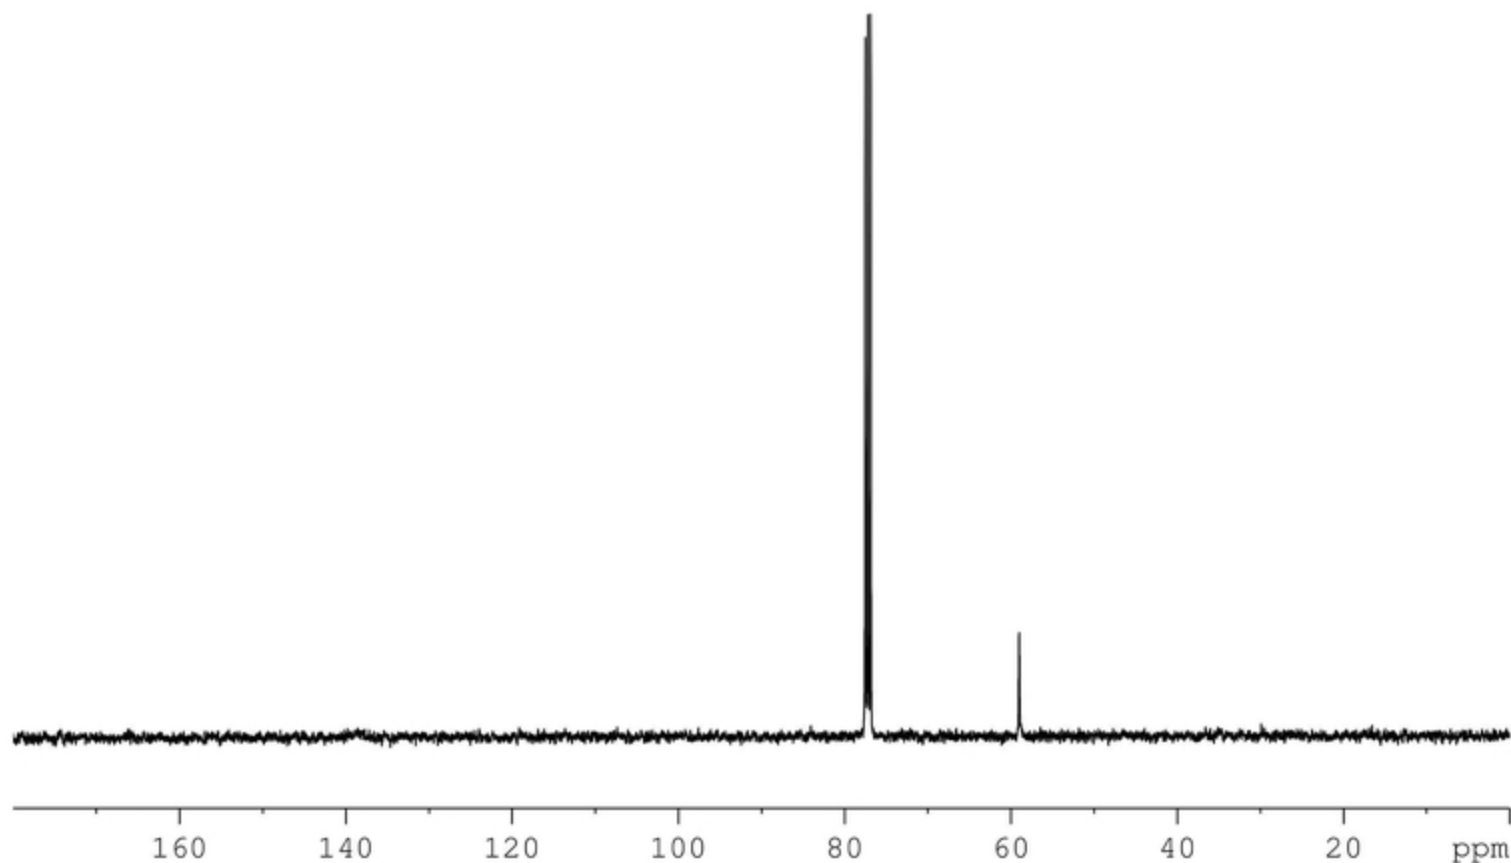

S51

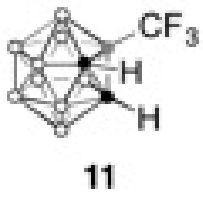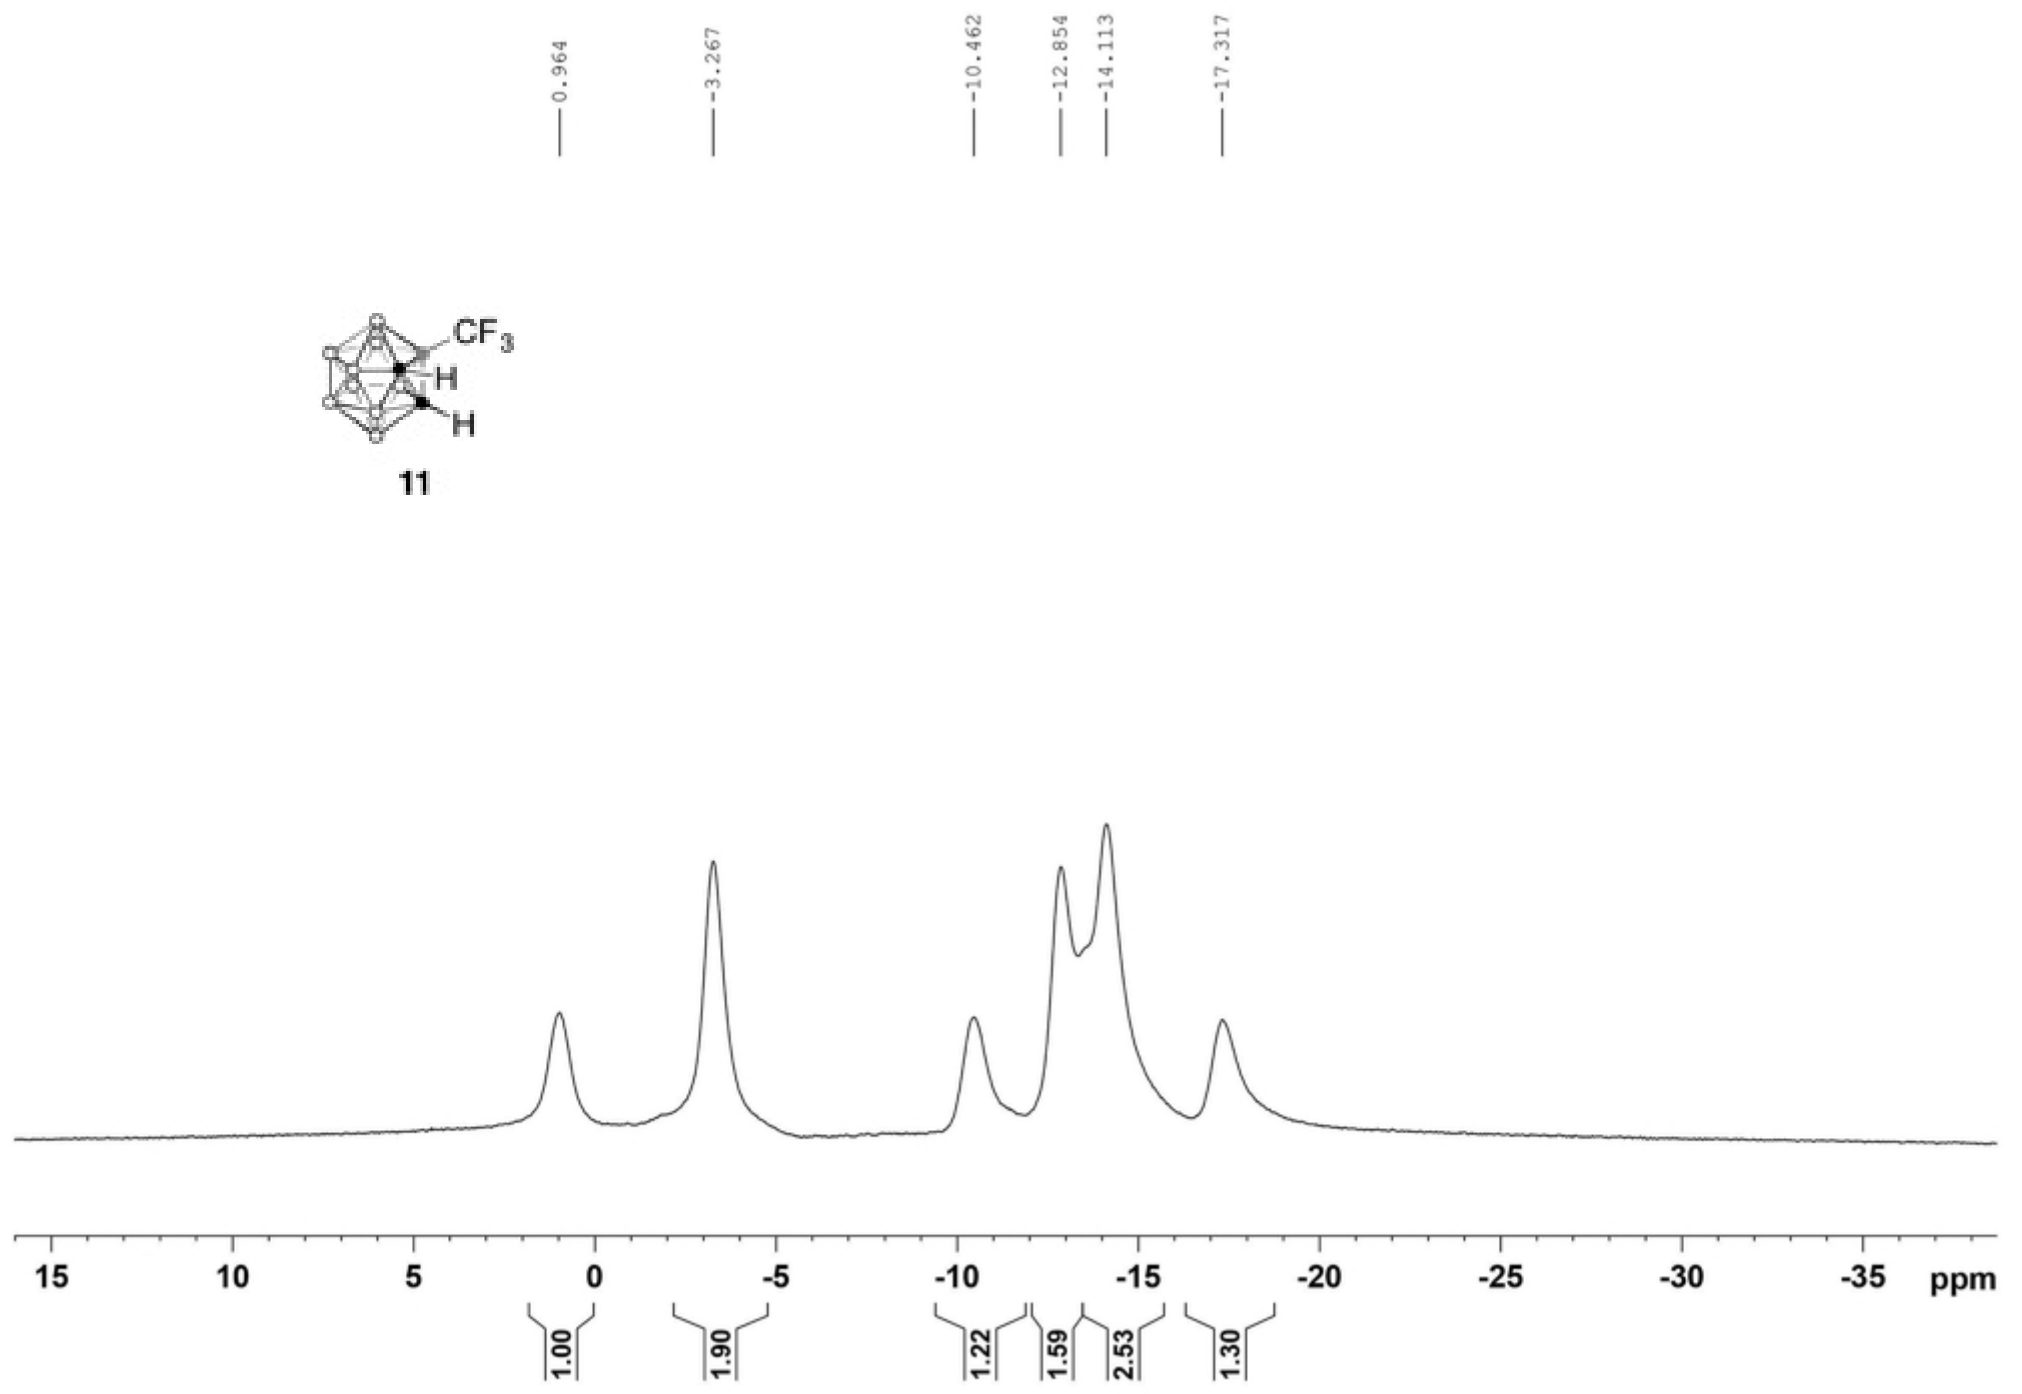

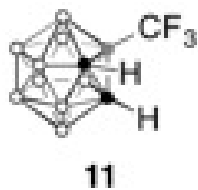

— 0.926  
 — -2.796  
 — -3.937  
 — -9.963  
 — -11.105  
 — -12.318  
 — -13.578  
 — -14.877  
 — -16.768  
 — -18.048

```

NAME      ZD-361-1-CDCl3-B(c)
EXPNO     1
PROCNO    1
Date_     20150730
Time      21.46
INSTRUM   spect
PROBHD    5 mm PABBO BB-
PULPROG   zg30
TD        65536
SOLVENT   CDCl3
NS        12
DS        0
SWH       25510.203 Hz
FIDRES    0.389255 Hz
AQ        1.2845556 sec
RG        456
DW        19.600 usec
DE        6.50 usec
TE        300.3 K
D1        5.00000000 sec
TD0       1
  
```

```

===== CHANNEL f1 =====
NUC1      11B
P1        7.60 usec
PL1       -3.00 dB
PL1W      55.13059616 W
SF01     128.3968556 MHz
SI        32768
SF        128.3966640 MHz
WDW       EM
SSB       0
LB        3.00 Hz
GB        0
PC        1.40
  
```

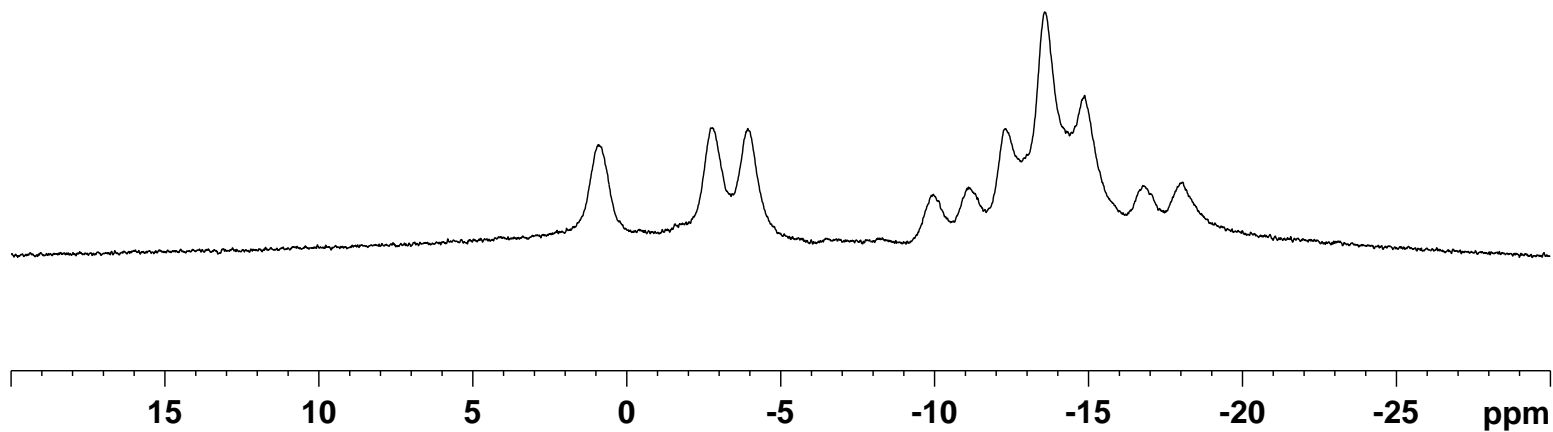

7.260

3.538

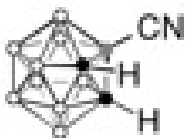

12

```
NAME      ZD-3-OH-CDC13-H
EXPNO     1
PROCNO    1
Date_     20160126
Time_     22.59 h
INSTRUM   spect
PROBHD    Z824601_0021 (
PULPROG   zg
TD        65536
SOLVENT   CDC13
NS        16
DS        0
SWH       8012.820 Hz
FIDRES    0.122266 Hz
AQ        4.0894966 sec
RG        181
DW        62.400 usec
DE        6.50 usec
TE        294.0 K
D1        1.00000000 sec
TD0       1
SFO1      400.1316005 MHz
NUC1      1H
P1        15.00 usec
SI        65536
SF        400.1300098 MHz
WDW       EM
SSB       0
LB        0.30 Hz
GB        0
PC        1.00
```

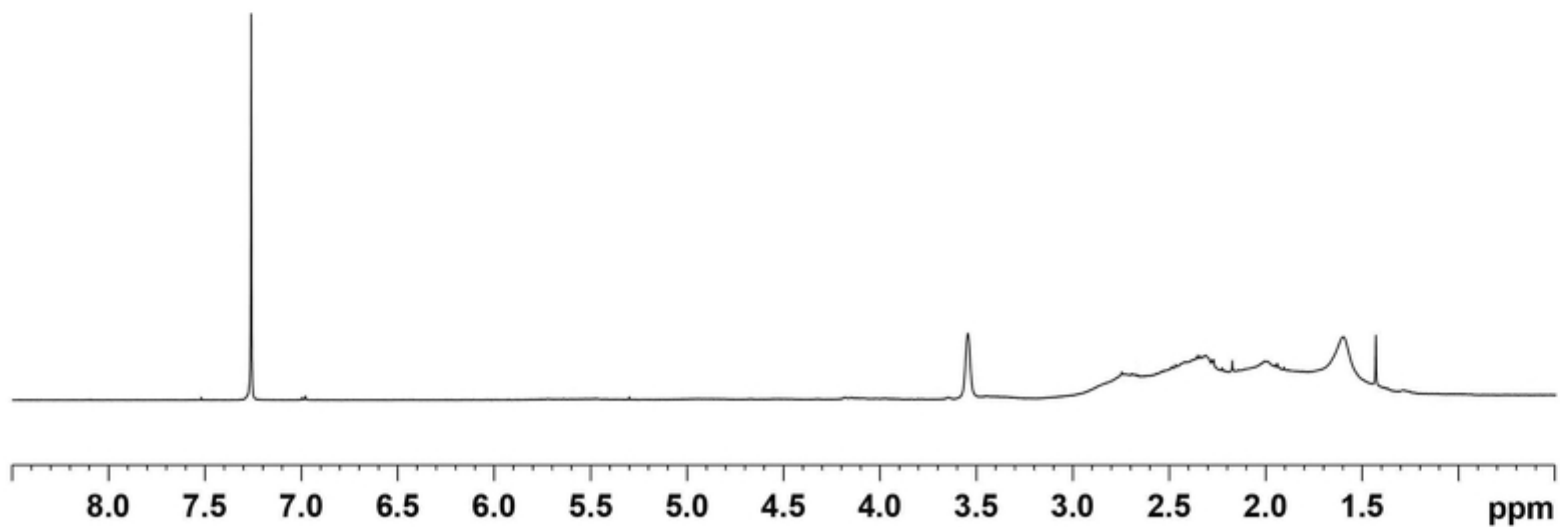

2.00

ZD-3-12-CDC13-C

77.477  
77.160  
76.842

53.919

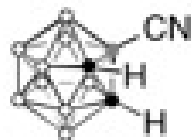

12

Current Data Parameters  
NAME 1  
EXPNO 1  
PROCNO 1

F2 - Acquisition Parameters  
Date\_ 20160103  
Time 21.29 h  
INSTRUM spect  
PROBHD Z824601\_0021 (   
PULPROG zgdc  
TD 131072  
SOLVENT CDC13  
NS 1180  
DS 0  
SWH 25252.525 Hz  
FIDRES 0.192661 Hz  
AQ 2.5952256 sec  
RG 203  
DW 19.800 usec  
DE 6.50 usec  
TE 294.0 K  
D1 1.00000000 sec  
D11 0.03000000 sec  
TD0 1  
SFO1 100.6227690 MHz  
NUC1 13C  
P1 9.50 usec  
PLW1 41.25000000 W  
SFO2 400.1320007 MHz  
NUC2 1H  
CPDPRG[2] waltz16  
PCPD2 90.00 usec  
PLW2 8.31000042 W  
PLW12 0.23083000 W

F2 - Processing parameters  
SI 131072  
SF 100.6127555 MHz  
WDW EM  
SSB 0  
LB 3.00 Hz  
GB 0  
PC 1.40

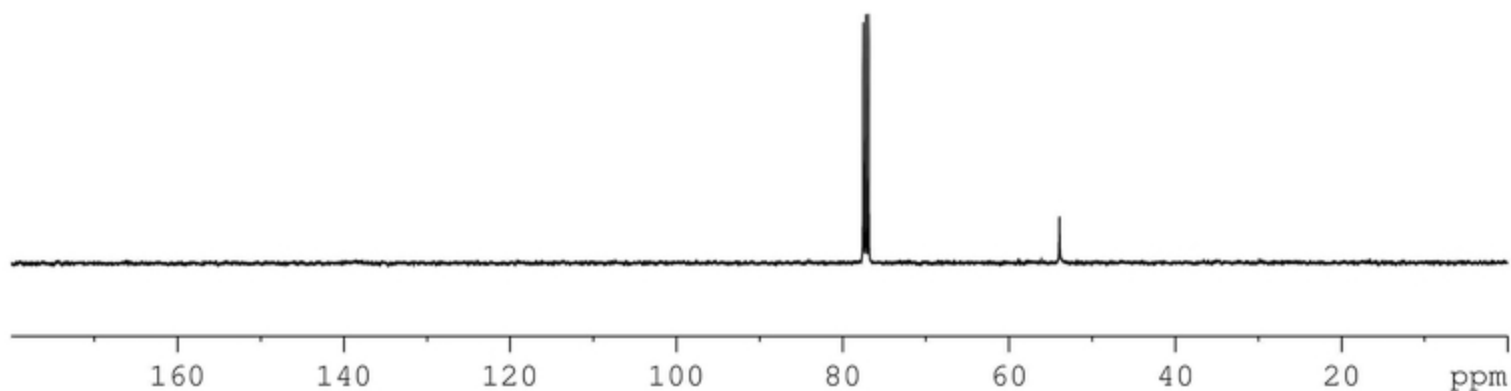

S55



**12**

---0.961  
 ---5.204  
 ---12.398  
 ---14.799  
 ---16.052  
 ---19.254

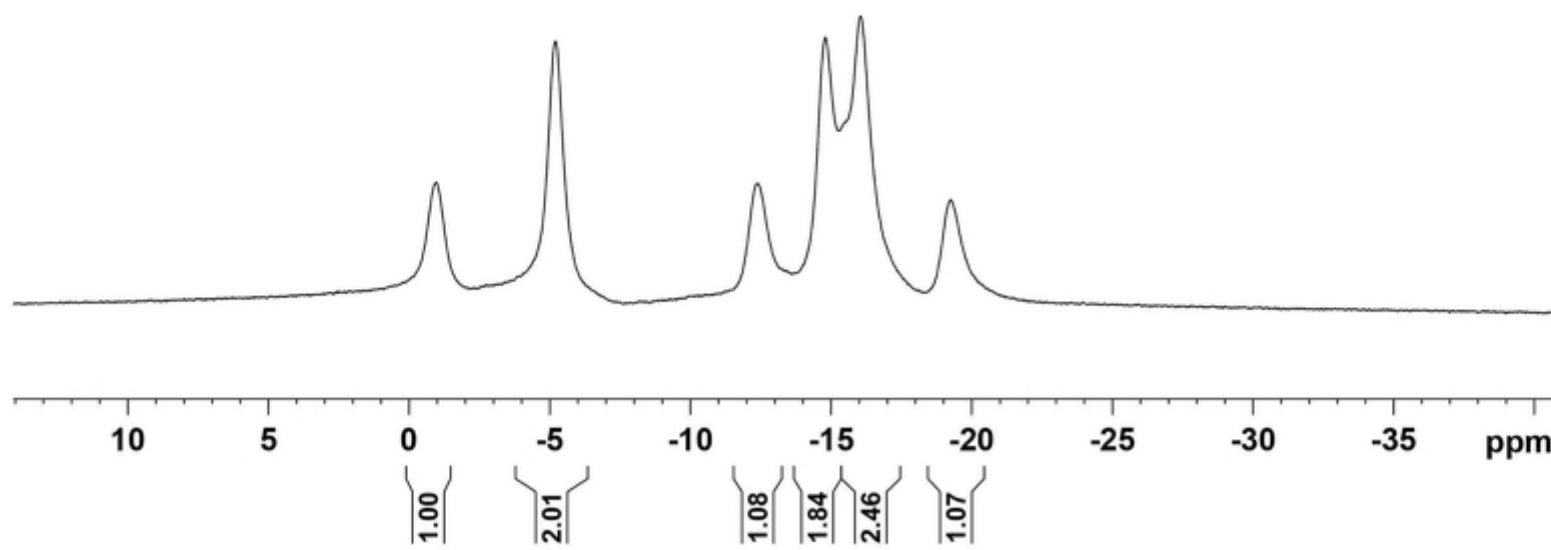

```

NAME      ZD-12-CDC13-B(de)
EXPNO     1
PROCNO    1
Date_     20150630
Time      09.52
INSTRUM   spect
PROBHD    5 mm PABBO BB-
PULPROG   zgdc
TD         65536
SOLVENT   CDC13
NS         23
DS         0
SWH       25510.203 Hz
FIDRES    0.389255 Hz
AQ         1.2845556 sec
RG         362
DW         19.600 usec
DE         6.50 usec
TE         300.8 K
D1         5.00000000 sec
D11        0.03000000 sec
TD0        1
  
```

```

===== CHANNEL f1 =====
NUC1      11B
P1         7.60 usec
PL1        -3.00 dB
PL1W      55.13059616 W
SFO1      128.3968556 MHz
  
```

```

===== CHANNEL f2 =====
CPDPRG2   waltz16
NUC2       1H
PCPD2      90.00 usec
PL2        -1.00 dB
PL12       15.16 dB
PL2W      13.56617069 W
PL12W      0.32844096 W
SFO2      400.1916008 MHz
SI         32768
SF         128.3969030 MHz
WDW        EM
SSB        0
LB         3.00 Hz
GB         0
PC         1.40
  
```



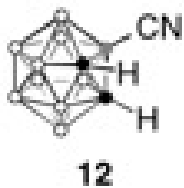

| -0.938  
 | -4.662  
 | -5.802  
 | -11.828  
 | -12.970  
 | -14.183  
 | -15.443  
 | -16.742  
 | -18.633  
 | -19.913

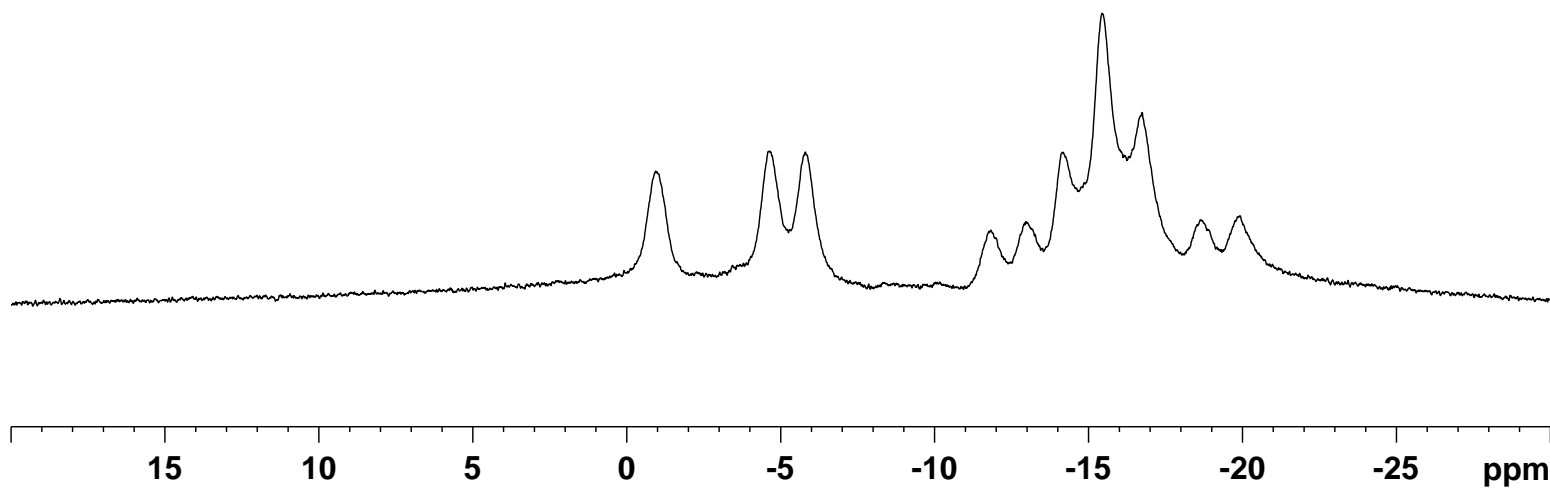

```

NAME      ZD-361-1-CDC13-B(c)
EXPNO    1
PROCNO   1
Date_    20150630
Time     09.53
INSTRUM  spect
PROBHD   5 mm PABBO BB-
PULPROG  zg30
TD       65536
SOLVENT  CDC13
NS       12
DS       0
SWH      25510.203 Hz
FIDRES   0.389255 Hz
AQ       1.2845556 sec
RG       456
DW       19.600 usec
DE       6.50 usec
TE       300.3 K
D1       5.0000000 sec
TD0      1
  
```

```

===== CHANNEL f1 =====
NUC1     11B
P1       7.60 usec
PL1      -3.00 dB
PL1W     55.13059616 W
SFO1     128.3968556 MHz
SI       32768
SF       128.3969035 MHz
WDW      EM
SSB      0
LB       3.00 Hz
GB       0
PC       1.40
  
```

ZD-405-3-CDC13-H

Bruker Advance III 400

NAME ZD-405-3-CDC13-H  
EXPNO 1  
PROCNO 1  
Date\_ 20140730  
Time 17.05  
INSTRUM spect  
PROBHD 5 mm PADUL 13C  
PULPROG zg30  
TD 65536  
SOLVENT CDC13  
NS 8  
DS 2  
SWH 9223.685 Hz  
FIDRES 0.125483 Hz  
AQ 3.9846387 sec  
RG 203  
DW 60.800 usec  
DE 6.50 usec  
TE 293.8 K  
D1 2.00000000 sec  
TD0 1

----- CHANNEL f1 -----  
NUC1 1H  
P1 14.83 usec  
PL1 0.00 dB  
PL1W 8.31434441 W  
SFO1 400.1324710 MHz  
SI 32768  
SF 400.1300085 MHz  
WDW EM  
SSB 0  
LB 0.30 Hz  
GB 0  
PC 1.00

7.260

3.985  
3.967  
3.950  
3.932  
3.562

1.307  
1.290  
1.272

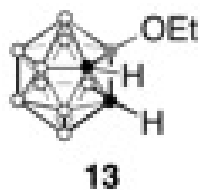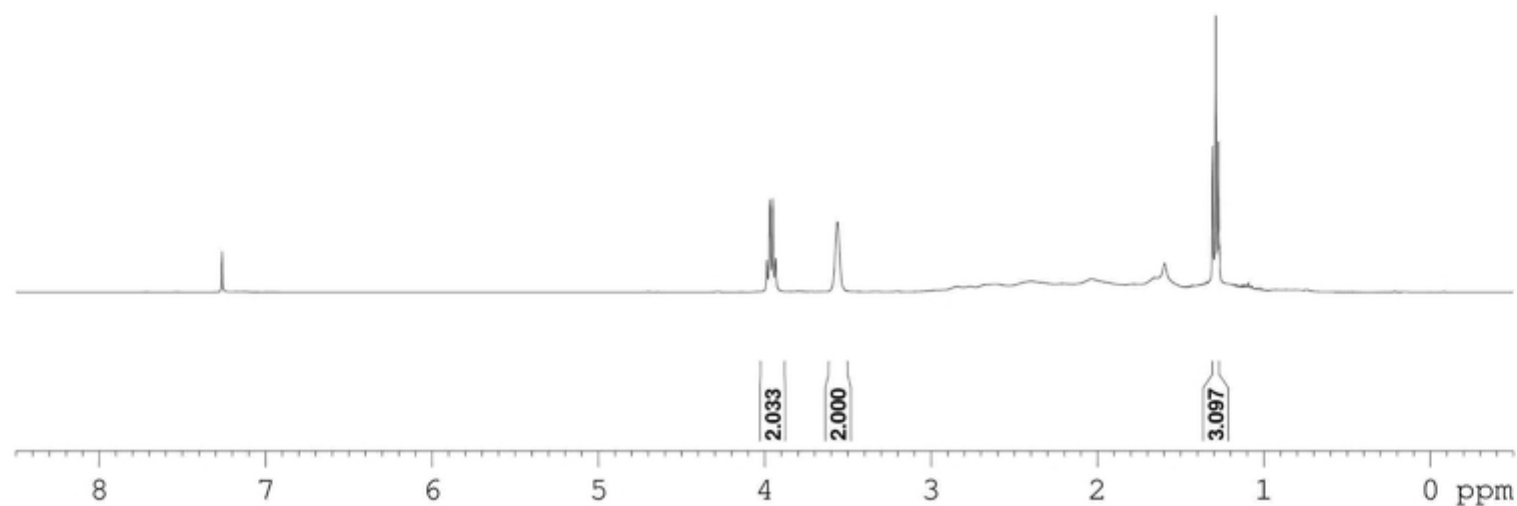

ZD-405-3-CDC13-C

Bruker Advance III 400

```
NAME      ZD-405-3-CDC13-C
EXPNO     1
PROCNO    1
Date_     20140730
Time      22.04
INSTRUM   spect
PROBHD    5 mm PADUL 13C
PULPROG   zgdc
TD         131072
SOLVENT   CDC13
NS         400
DS         0
SWH       29761.904 Hz
FIDRES    0.227065 Hz
AQ         2.2020595 sec
RG         203
DW         16.800 usec
DE         6.50 usec
TE         294.4 K
D1         1.00000000 sec
D11        0.03000000 sec
TD0        1
```

```
----- CHANNEL f1 -----
NUC1      13C
P1         9.68 usec
PL1        -0.60 dB
PL1W      41.24164963 W
SFO1      100.6227690 MHz
```

```
----- CHANNEL f2 -----
CPDPRG2   waltz16
NUC2       1H
PCPD2     90.00 usec
PL2         0.00 dB
PL12       15.66 dB
PL2W      8.31434441 W
PL12W     0.22585411 W
SFO2      400.1320007 MHz
SI         131072
SF         100.6127557 MHz
WDW        EM
SSB         0
LB          1.00 Hz
GB          0
PC          1.40
```

77.478  
77.160  
76.843  
65.965  
55.979  
17.034

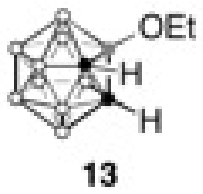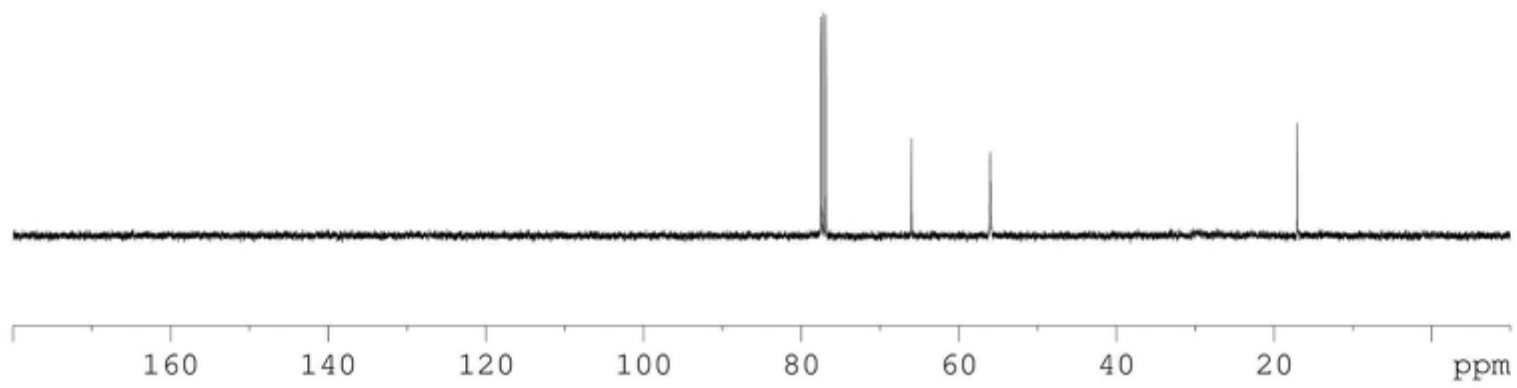

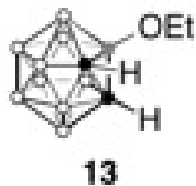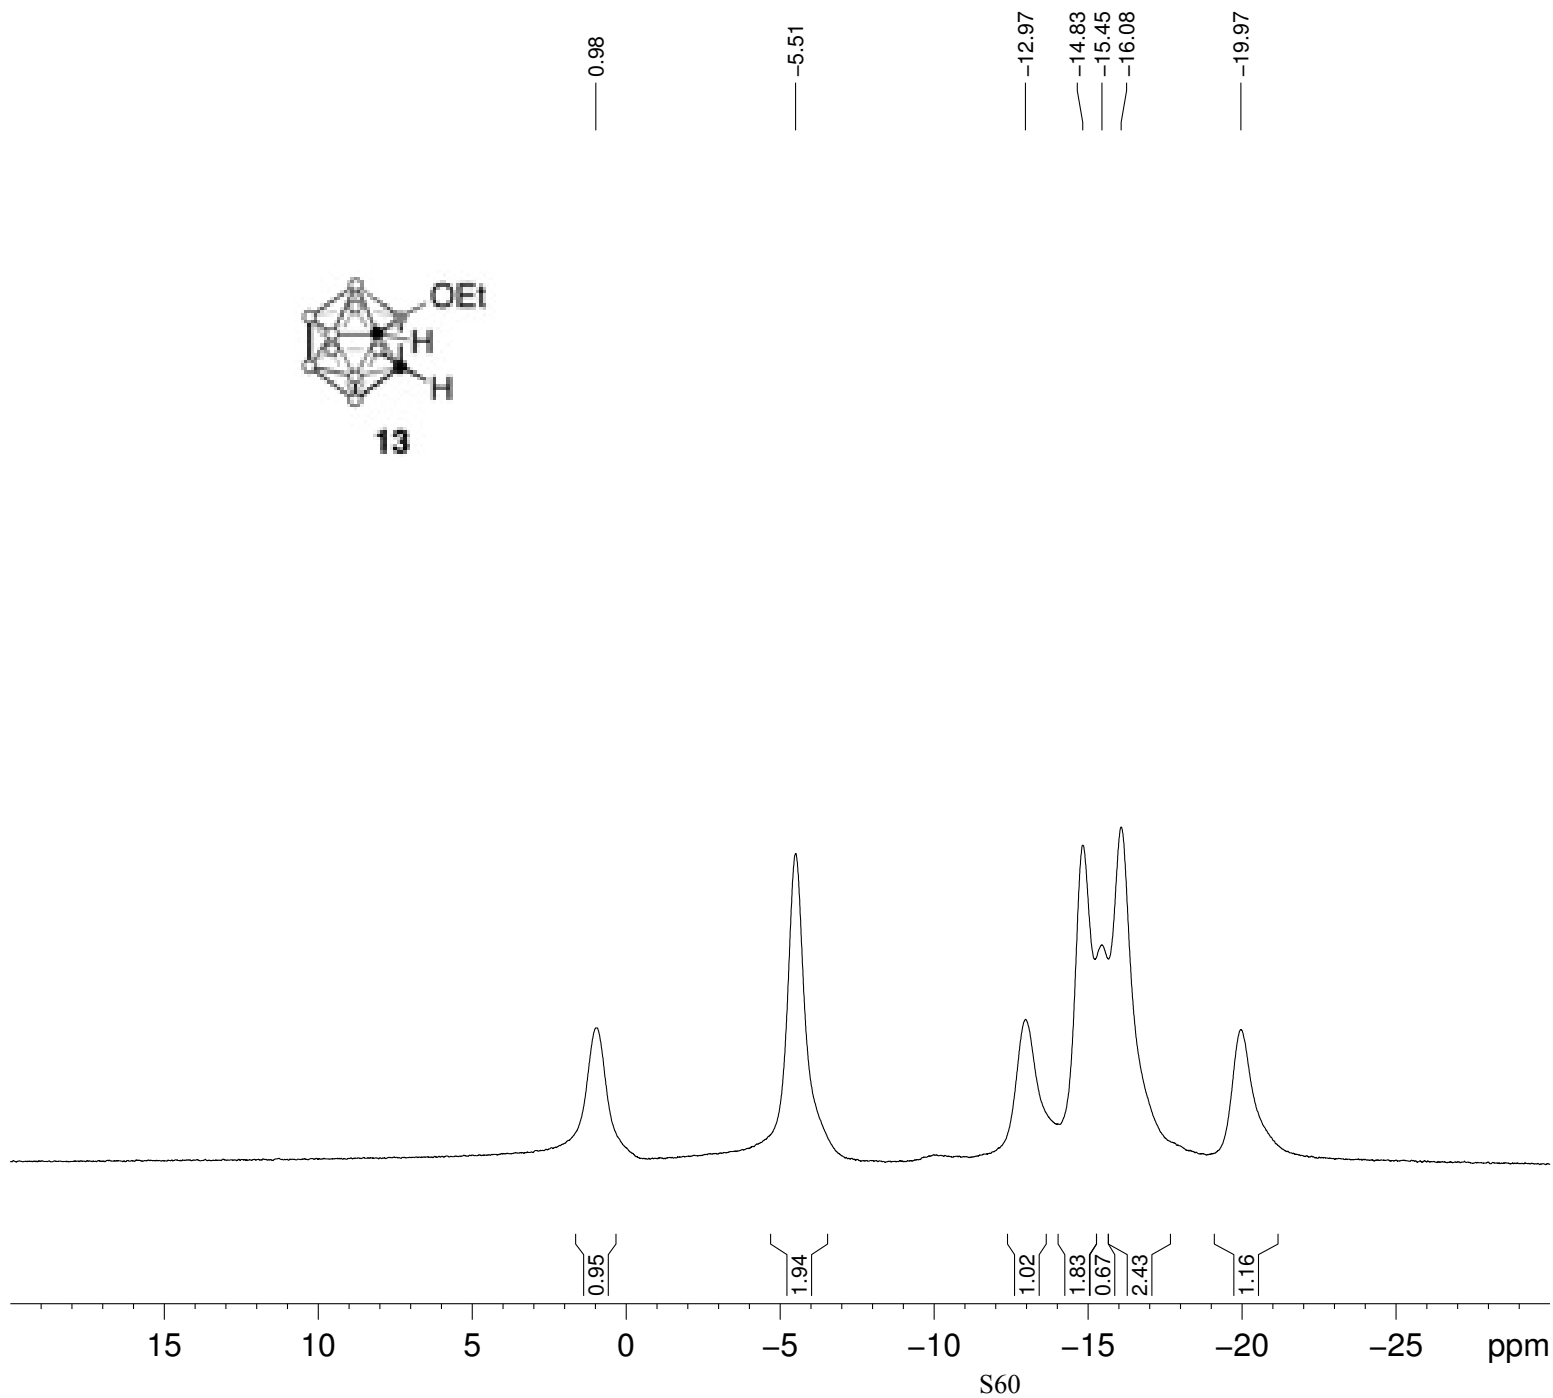

ZD-405-3-CDC13-B (de)

```

NAME      ZD-405-3-CDC13-B (de)
EXPNO     1
PROCNO    1
Date_     20140730
Time      20.29
INSTRUM   spect
PROBHD    5 mm PABBO BB-
PULPROG   zgdc
TD        65536
SOLVENT   CDC13
NS        8
DS        0
SWH       25510.203 Hz
FIDRES    0.389255 Hz
AQ        1.2845556 sec
RG        256
DW        19.600 usec
DE        6.50 usec
TE        298.6 K
D1        5.0000000 sec
D11       0.03000000 sec
TD0       1
  
```

```

===== CHANNEL f1 =====
NUC1      11B
P1        7.60 usec
PL1       -3.00 dB
PL1W      55.13059616 W
SFO1      128.3968556 MHz
  
```

```

===== CHANNEL f2 =====
CPDPRG2   waltz16
NUC2      1H
PCPD2     90.00 usec
PL2       -1.00 dB
PL12      15.16 dB
PL2W      13.56617069 W
PL12W     0.32844096 W
SFO2      400.1916008 MHz
SI        32768
SF        128.3968847 MHz
WDW       EM
SSB       0
LB        3.00 Hz
GB        0
PC        1.40
  
```



0.98

-4.94

-6.08

-12.44

-13.59

-14.21

-14.73

-15.47

-16.10

-16.73

-19.39

-20.56

ZD-405-3-CDC13-B (c)

```

NAME      ZD-405-3-CDC13-B (c)
EXPNO     1
PROCNO    1
Date_     20140730
Time      20.31
INSTRUM   spect
PROBHD    5 mm PABBO BB-
PULPROG   zg30
TD         65536
SOLVENT   CDC13
NS         16
DS         0
SWH        25510.203 Hz
FIDRES     0.389255 Hz
AQ         1.2845556 sec
RG         161
DW         19.600 usec
DE         6.50 usec
TE         298.2 K
D1         5.00000000 sec
TD0        1
  
```

```

===== CHANNEL f1 =====
NUC1      11B
P1        7.60 usec
PL1       -3.00 dB
PL1W      55.13059616 W
SFO1      128.3968556 MHz
SI         32768
SF         128.3968865 MHz
WDW        EM
SSB        0
LB         3.00 Hz
GB         0
PC         1.40
  
```

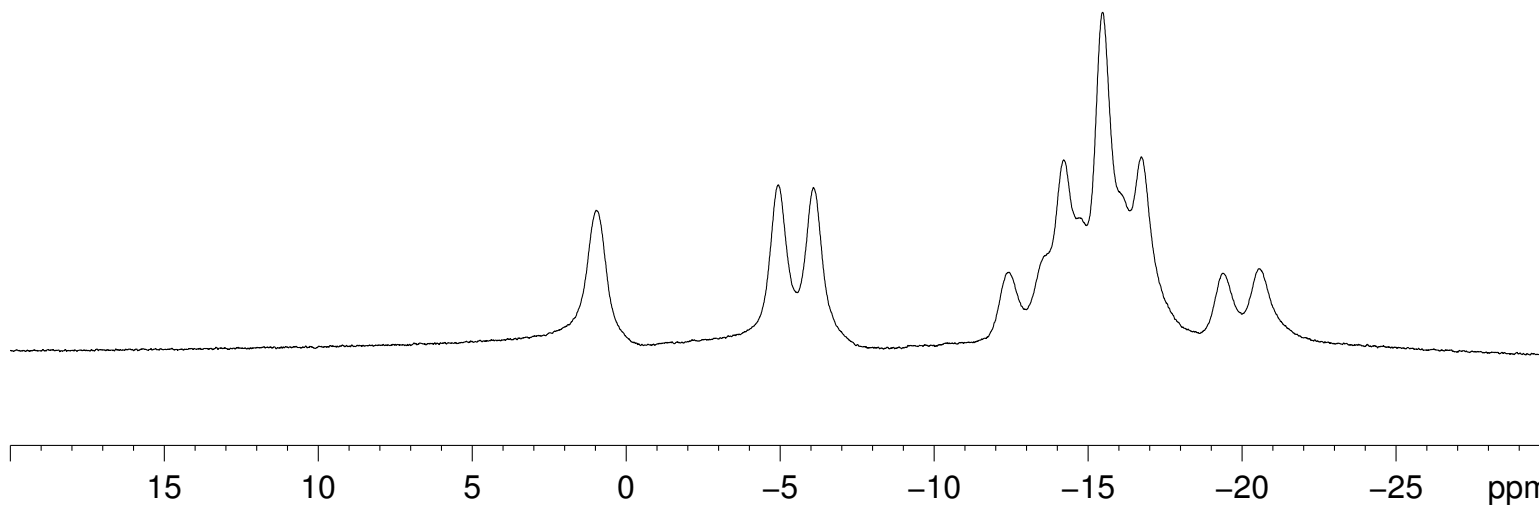

7.260

3.769

ZD-3-SCN-CDCl3-H

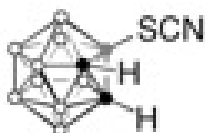

14

Current Data Parameters  
NAME ZD-3-SCN-CDCl3-H  
EXPNO 2  
PROCNO 1

F2 - Acquisition Parameters  
Date\_ 20160127  
Time 13.55 h  
INSTRUM spect  
PROBHD Z108618\_0257 (  
PULPROG zg30  
TD 65536  
SOLVENT CDCl3  
NS 8  
DS 2  
SWH 8012.820 Hz  
FIDRES 0.122266 Hz  
AQ 4.0894465 sec  
RG 203  
DW 62.400 usec  
DE 6.50 usec  
TE 298.2 K  
D1 1.0000000 sec  
TD0 1  
SFO1 400.2324714 MHz  
NUC1 1H  
P1 12.80 usec  
PLW1 13.56000042 W

F2 - Processing parameters  
SI 65536  
SF 400.2300101 MHz  
WDW EM  
SSB 0  
LB 0.30 Hz  
GB 0  
PC 1.00

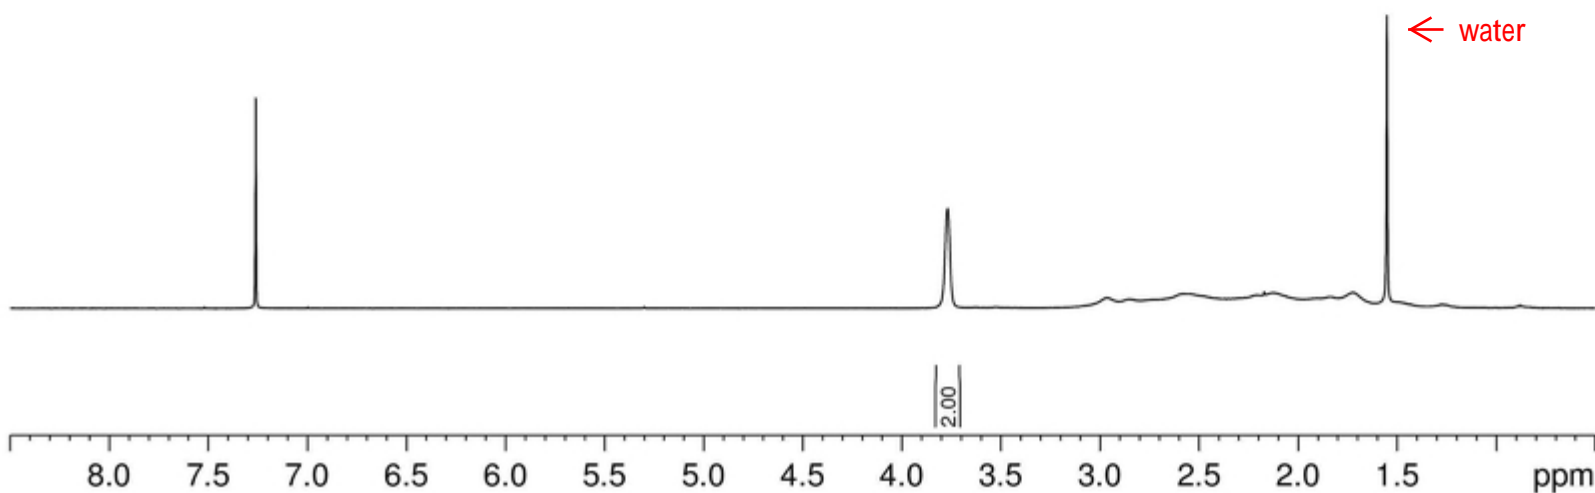

ZD-3-SCN-CDC13-C

Current Data Parameters  
NAME ZD-3-SCN-CDC13-C  
EXPNO 1  
PROCNO 1

F2 - Acquisition Parameters  
Date\_ 20160127  
Time 14.08 h  
INSTRUM spect  
PROBHD Z824601\_0021 (   
PULPROG zgdc  
TD 131072  
SOLVENT CDC13  
NS 1180  
DS 0  
SWH 25252.525 Hz  
FIDRES 0.192661 Hz  
AQ 2.5952256 sec  
RG 203  
DW 19.800 usec  
DE 6.50 usec  
TE 294.0 K  
D1 1.00000000 sec  
D11 0.03000000 sec  
TD0 1  
SFO1 100.6227690 MHz  
NUC1 13C  
P1 9.50 usec  
PLW1 41.25000000 W  
SFO2 400.1320007 MHz  
NUC2 1H  
CPDPRG[2] waltz16  
PCPD2 90.00 usec  
PLW2 8.31000042 W  
PLW12 0.23083000 W

F2 - Processing parameters  
SI 131072  
SF 100.6127555 MHz  
WDW EM  
SSB 0  
LB 3.00 Hz  
GB 0  
PC 1.40

118.729

77.477  
77.160  
76.842

56.658

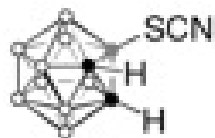

14

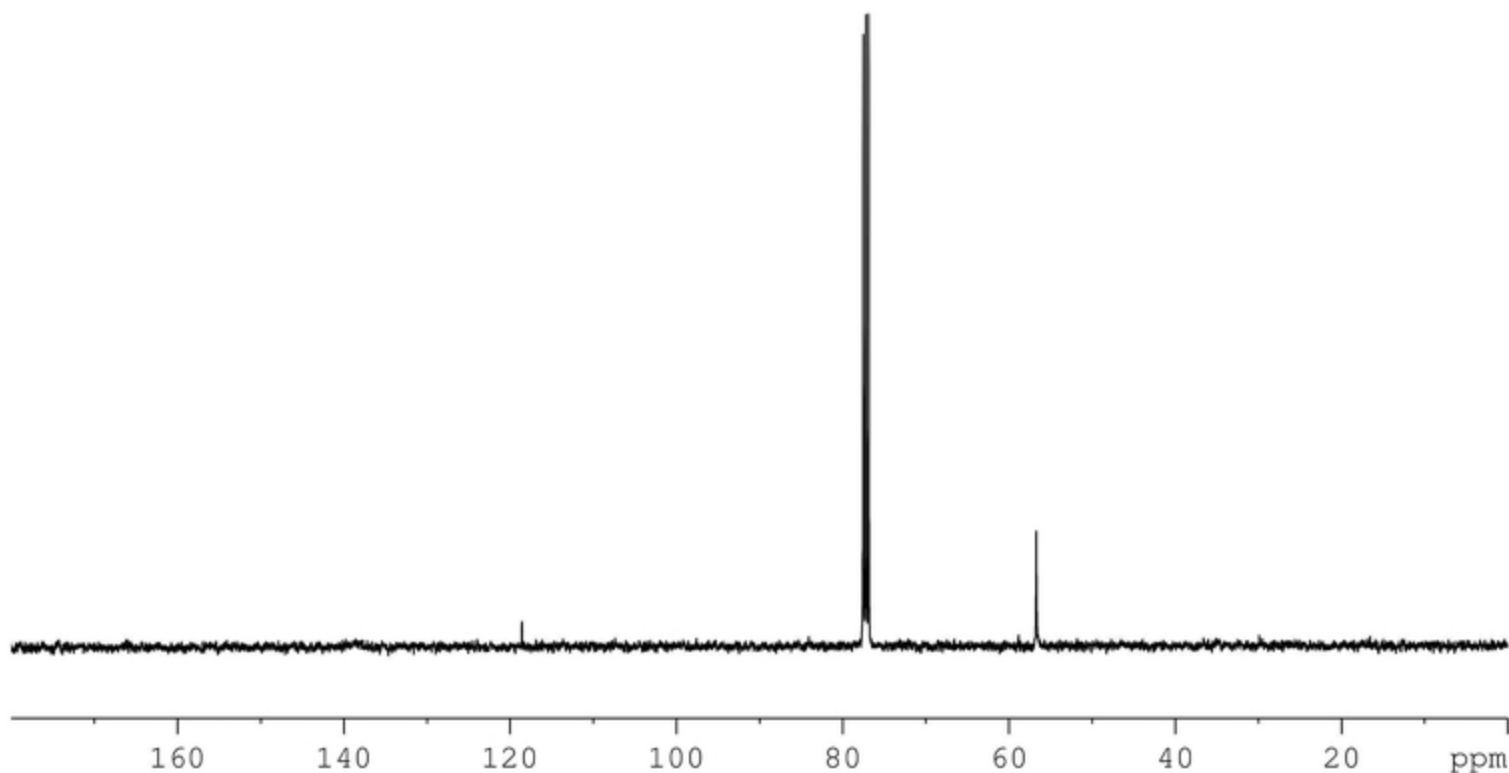

S63

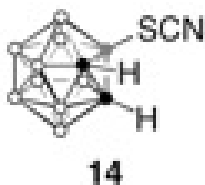

— -3.75  
 — -10.34  
 — -12.02  
 — -13.89  
 — -14.97

ZD-3-SCN-CDCl3-B (de)

Current Data Parameters  
 NAME ZD-3-SCN-CDCl3-B (de)  
 EXPNO 1  
 PROCNO 1

F2 - Acquisition Parameters  
 Date\_ 20160127  
 Time 13.58 h  
 INSTRUM spect  
 PROBHD Z108618\_0257 (  
 PULPROG zgdc  
 TD 65536  
 SOLVENT CDCl3  
 NS 8  
 DS 4  
 SWH 24038.461 Hz  
 FIDRES 0.366798 Hz  
 AQ 1.3631488 sec  
 RG 322  
 DW 20.800 usec  
 DE 6.50 usec  
 TE 298.4 K  
 D1 2.0000000 sec  
 D11 0.0300000 sec  
 TD0 1  
 SFO1 128.4096890 MHz  
 NUC1 11B  
 P1 7.50 usec  
 PLW1 55.09999847 W  
 SFO2 400.2316009 MHz  
 NUC2 1H  
 CPDPRG[2] waltz16  
 PCPD2 90.00 usec  
 PLW2 13.56000042 W  
 PLW12 0.27428001 W

F2 - Processing parameters  
 SI 32768  
 SF 128.4097615 MHz  
 WDW EM  
 SSB 0  
 LB 1.00 Hz  
 GB 0  
 PC 1.40

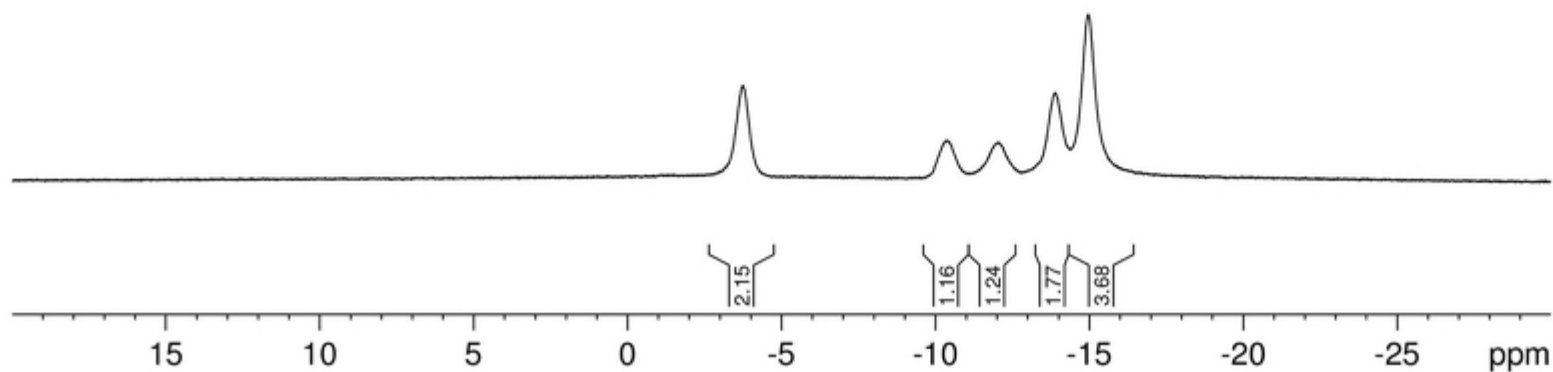



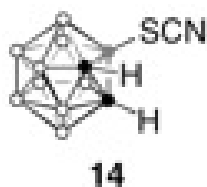

— -3.02  
 — -4.19  
  
 — -9.60  
 — -10.86  
 — -11.91  
 — -13.10  
 — -14.27  
 — -15.48

ZD-3-SCN-CDC13-B (c)

Current Data Parameters  
 NAME ZD-3-SCN-CDC13-B (c)  
 EXPNO 1  
 PROCNO 1

F2 - Acquisition Parameters  
 Date\_ 20160127  
 Time 13.59 h  
 INSTRUM spect  
 PROBHD Z108618\_0257 (  
 PULPROG zg  
 TD 65536  
 SOLVENT CDC13  
 NS 24  
 DS 2  
 SWH 24038.461 Hz  
 FIDRES 0.366798 Hz  
 AQ 1.3631488 sec  
 RG 101  
 DW 20.800 usec  
 DE 6.50 usec  
 TE 298.3 K  
 D1 2.0000000 sec  
 TD0 1  
 SFO1 128.4096890 MHz  
 NUC1 11B  
 P1 7.50 usec  
 PLW1 55.09999847 W

F2 - Processing parameters  
 SI 32768  
 SF 128.4097430 MHz  
 WDW EM  
 SSB 0  
 LB 1.00 Hz  
 GB 0  
 PC 1.40

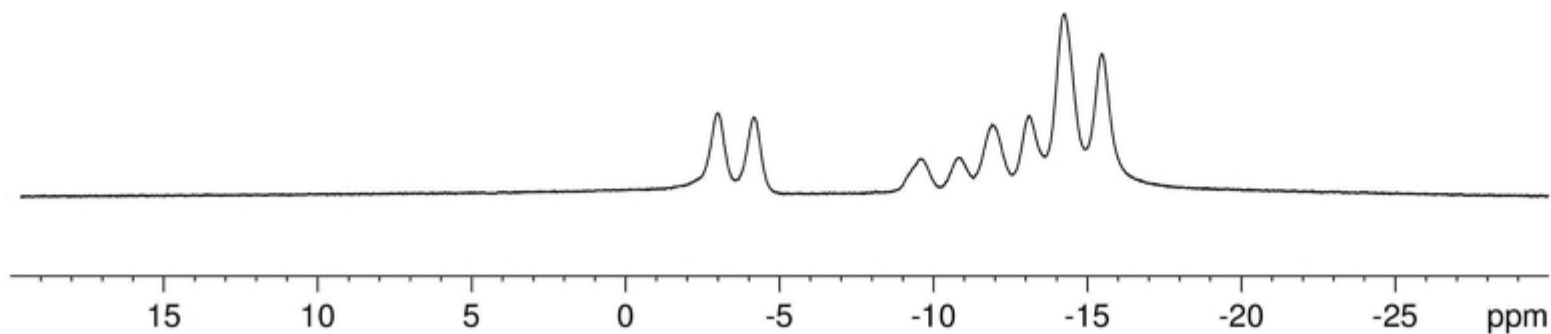

7.609  
7.592  
7.449  
7.446  
7.442  
7.435  
7.427  
7.421  
7.413  
7.409  
7.406  
7.387  
7.372  
7.368  
7.351  
7.348  
7.260

3.710

ZD-3-Ph-CDCI3-H

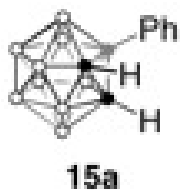

Current Data Parameters  
NAME ZD-3-Ph-CDCI3-H  
EXPNO 1  
PROCNO 1

F2 - Acquisition Parameters  
Date\_ 20160321  
Time 11.41 h  
INSTRUM spect  
PROBHD Z108618\_0257 (  
PULPROG zg30  
TD 65536  
SOLVENT CDCl3  
NS 4  
DS 2  
SWH 8012.820 Hz  
FIDRES 0.122266 Hz  
AQ 4.0894465 sec  
RG 203  
DW 62.400 usec  
DE 6.50 usec  
TE 294.6 K  
D1 1.00000000 sec  
TD0 1  
SFO1 400.2324714 MHz  
NUC1 1H  
P1 12.80 usec  
PLW1 13.56000042 W

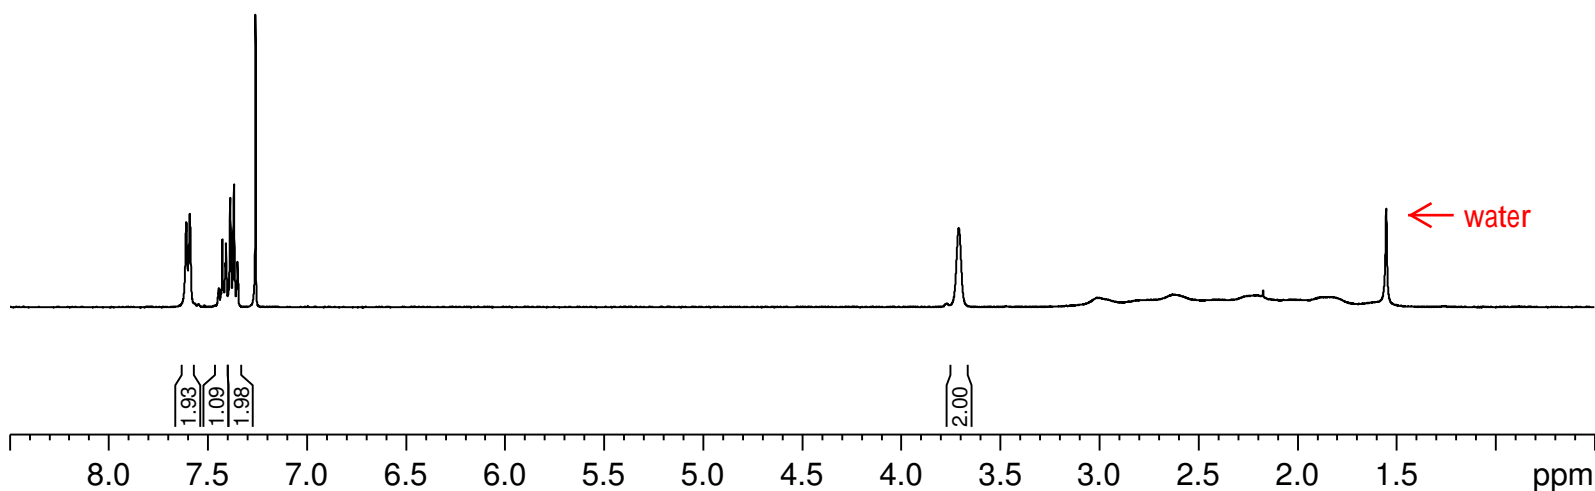

F2 - Processing parameters  
SI 65536  
SF 400.230098 MHz  
WDW EM  
SSB 0  
LB 0.30 Hz  
GB 0  
PC 1.00

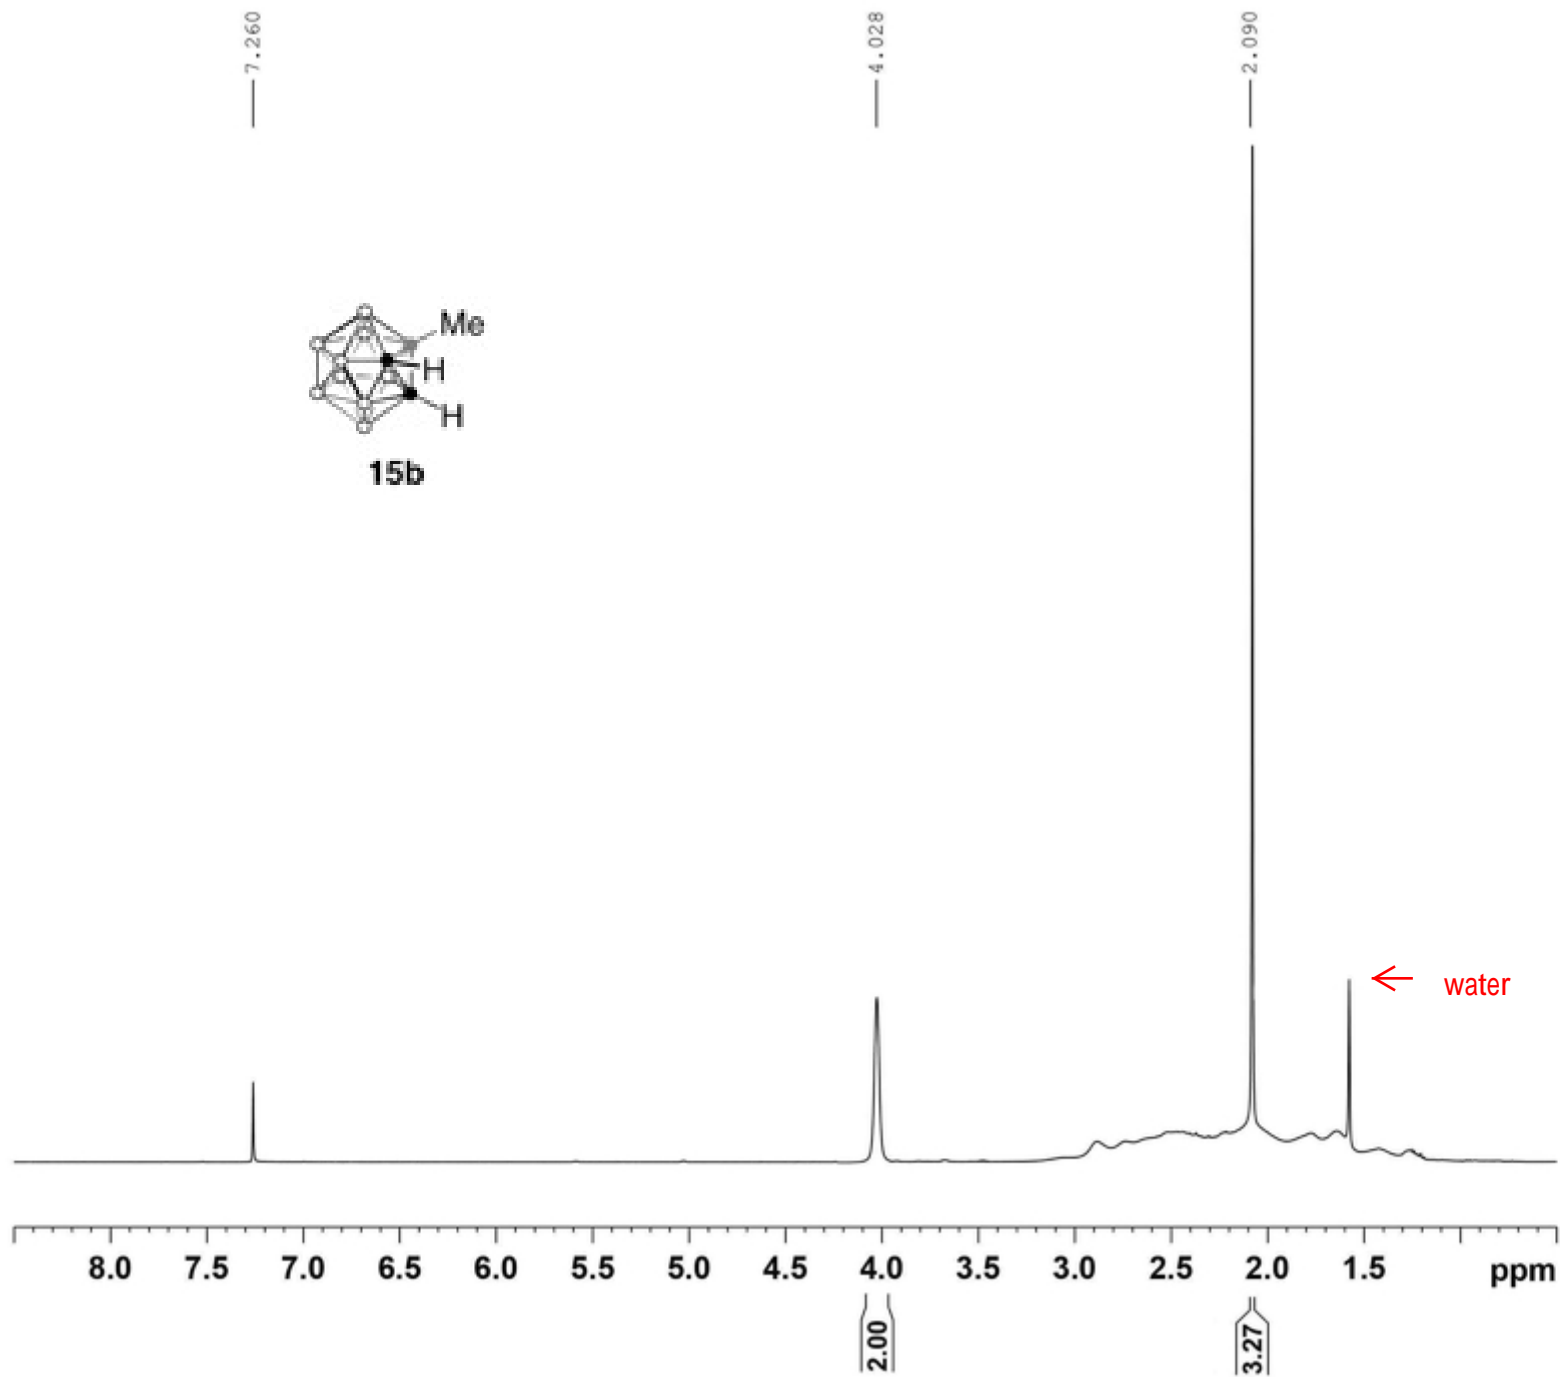

```

NAME      ZD-3-Me-CDCl3-H
EXPNO     1
PROCNO    1
Date_     20140822
Time      23.40
INSTRUM   spect
PROBHD    5 mm PADUL 13C
PULPROG   zg
TD         65536
SOLVENT   CDCl3
NS         16
DS         0
SWH       10000.000 Hz
FIDRES    0.152588 Hz
AQ        3.2768500 sec
RG         144
DW         50.000 usec
DE         6.50 usec
TE         294.4 K
D1         1.00000000 sec
TD0        1

```

```

----- CHANNEL f1 -----
NUC1      1H
P1        14.83 usec
PL1       0.00 dB
PL1W      8.31434441 W
SFO1      400.1318000 MHz
SI        65536
SF        400.1300083 MHz
WDW       EM
SSB       0
LB        0.30 Hz
GB        0
PC        1.00

```

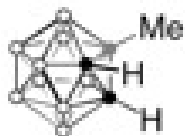

15b

77.481  
77.149  
76.841  
55.547  
22.882

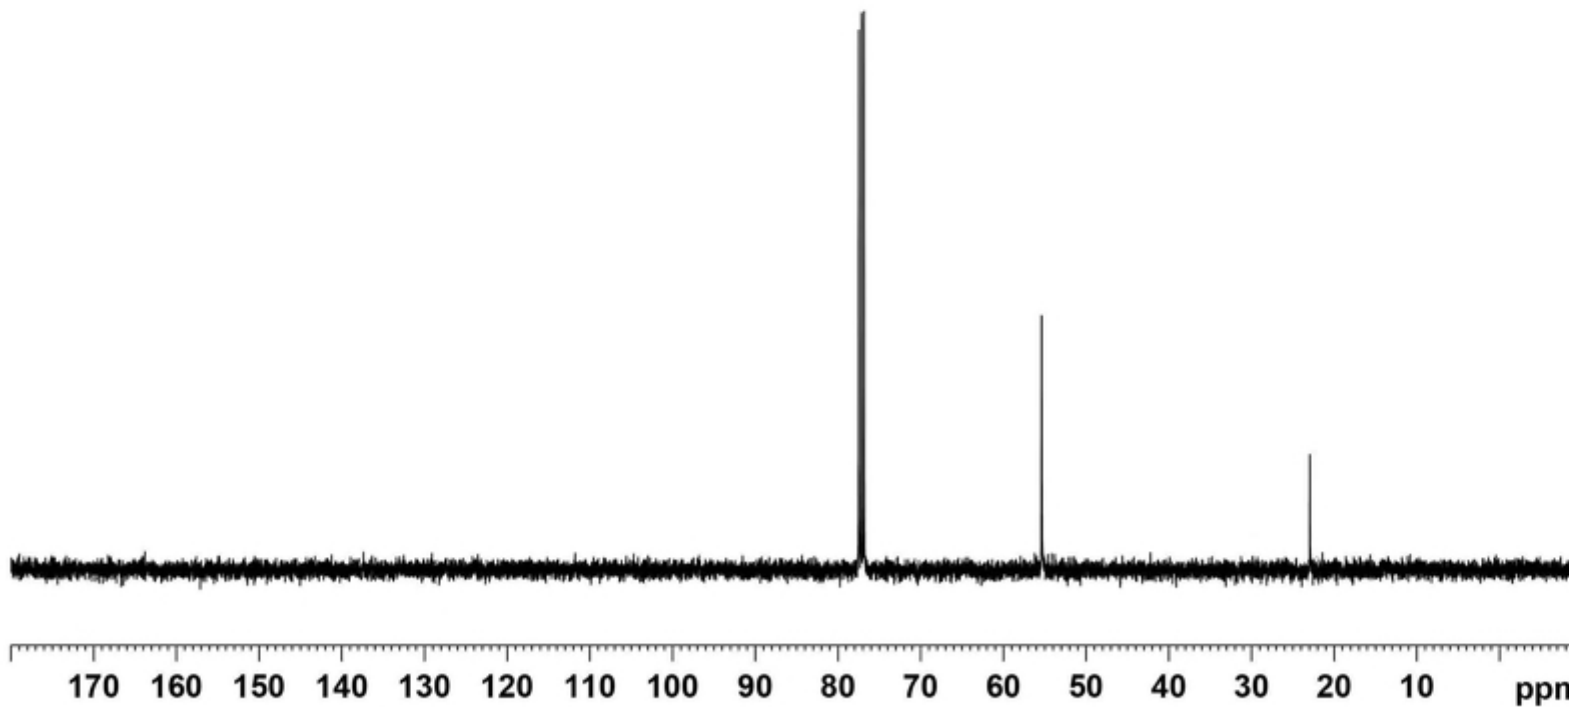

```

NAME      ZD-3-Me-CDC13-C
EXPNO     1
PROCNO    1
Date_     20140822
Time      23.42
INSTRUM   spect
PROBHD    5 mm PADUL 13C
PULPROG   zgdc
TD         131072
SOLVENT   CDC13
NS         666
DS         0
SWH       29761.904 Hz
FIDRES    0.227065 Hz
AQ        2.2020595 sec
RG         203
DW         16.800 usec
DE         6.50 usec
TE         294.4 K
D1         1.0000000 sec
D11        0.03000000 sec
TDO       1
  
```

```

===== CHANNEL f1 =====
NUC1      13C
P1        9.68 usec
PL1       -0.60 dB
PL1W      41.24164963 W
SFO1      100.6227690 MHz
  
```

```

===== CHANNEL f2 =====
CPDPRG2   waltz16
NUC2      1H
PCPD2     90.00 usec
PL2        0.00 dB
PL12      15.66 dB
PL2W      8.31434441 W
PL12W     0.22585411 W
SFO2      400.1320007 MHz
SI         131072
SF         100.6127554 MHz
WDW        EM
SSB        0
LB         1.00 Hz
GB         0
PC         1.40
  
```

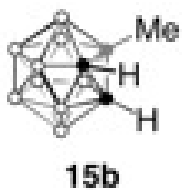

— -3.907  
 — -10.011  
 — -12.984  
 — -13.717  
 — -14.847

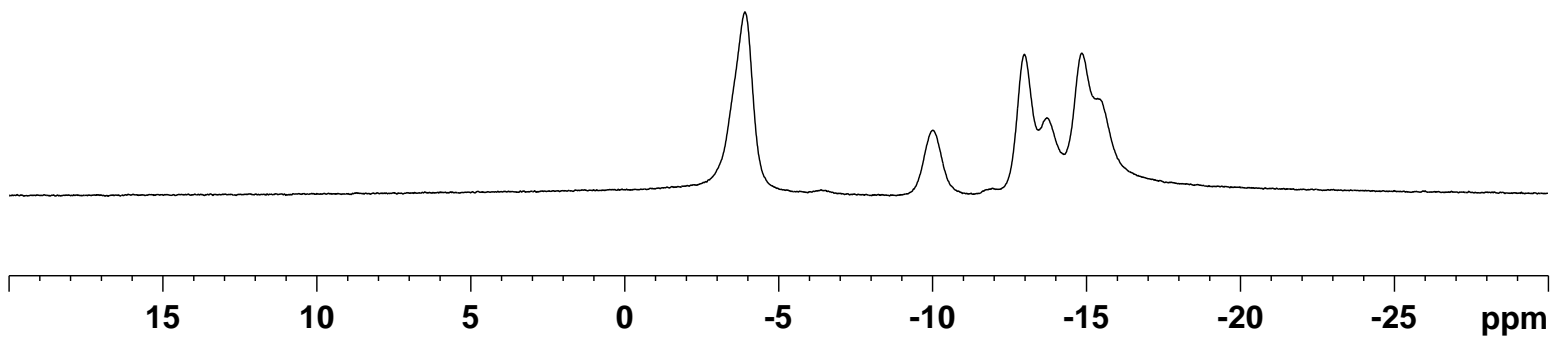

2.79  
 1.15  
 1.71  
 1.14  
 3.22

```

NAME      ZD-3-Me-CDC13-B(de)
EXPNO     1
PROCNO    1
Date_     20140822
Time      23.25
INSTRUM   spect
PROBHD    5 mm PABBO BB-
PULPROG   zgdc
TD         65536
SOLVENT   CDCl3
NS         4
DS         0
SWH       25510.203 Hz
FIDRES    0.389255 Hz
AQ        1.2845556 sec
RG         287
DW         19.600 usec
DE         6.50 usec
TE         295.8 K
D1         5.00000000 sec
D11        0.03000000 sec
TD0        1
  
```

```

===== CHANNEL f1 =====
NUC1      11B
P1        7.60 usec
PL1       -3.00 dB
PL1W      55.13059616 W
SFO1      128.3968556 MHz
  
```

```

===== CHANNEL f2 =====
CPDPRG2   waltz16
NUC2      1H
PCPD2     90.00 usec
PL2       -1.00 dB
PL12      15.16 dB
PL2W      13.56617069 W
PL12W     0.32844096 W
SFO2      400.1916008 MHz
SI        32768
SF        128.3967486 MHz
WDW       EM
SSB       0
LB        3.00 Hz
GB        0
PC        1.40
  
```

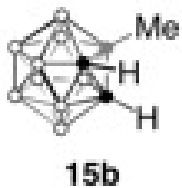

| -3.426  
 | -4.499  
  
 | -9.344  
 | -10.558  
 | -12.311  
 | -13.599  
 | -14.205  
 | -15.397

```

NAME      ZD-3-Me-CDCl3-B(c)
EXPNO     1
PROCNO    1
Date_     20140822
Time      23.28
INSTRUM   spect
PROBHD    5 mm PABBO BB-
PULPROG   zg30
TD        65536
SOLVENT   CDCl3
NS         8
DS         0
SWH       25510.203 Hz
FIDRES    0.389255 Hz
AQ        1.2845556 sec
RG         161
DW        19.600 usec
DE         6.50 usec
TE        295.5 K
D1        5.00000000 sec
TD0       1
  
```

```

===== CHANNEL f1 =====
NUC1      11B
P1        7.60 usec
PL1       -3.00 dB
PL1W      55.13059616 W
SFO1      128.3968556 MHz
SI        32768
SF        128.3967436 MHz
WDW       EM
SSB       0
LB        3.00 Hz
GB        0
PC        1.40
  
```

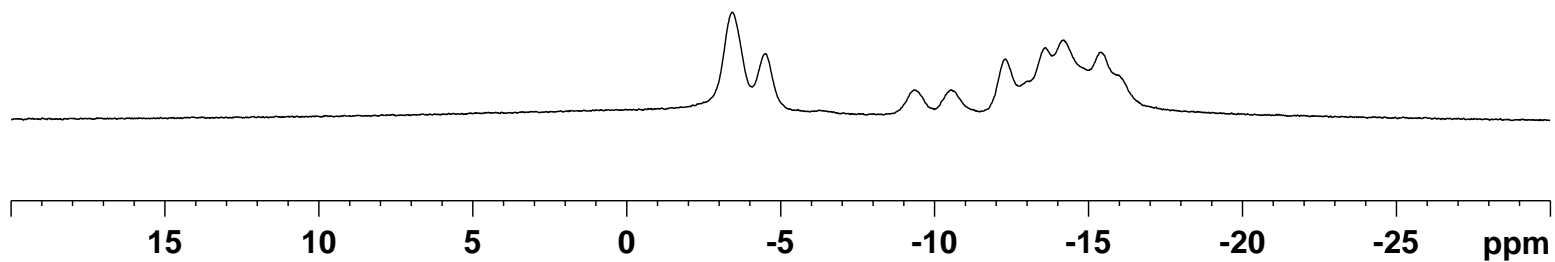

7.260

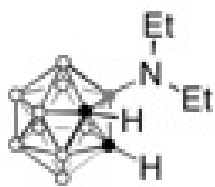

16a

3.796  
3.780  
3.674  
3.651  
3.633

1.281  
1.083

ZD-719-CDC13-H

Bruker Advance III 400

```
NAME      ZD-719-CDC13-H
EXPNO     1
PROCNO    1
Date_     20140806
Time      17.00
INSTRUM   spect
PROBHD    5 mm PADUL 13C
PULPROG   zg30
TD        65536
SOLVENT   CDC13
NS        8
DS        2
SWH       8223.685 Hz
FIDRES    0.125483 Hz
AQ        3.9846387 sec
RG        71.8
DW        60.800 usec
DE        6.50 usec
TE        293.9 K
D1        2.00000000 sec
TD0       1
```

```
===== CHANNEL f1 =====
NUC1      1H
P1        14.83 usec
PL1       0.00 dB
PL1W      8.31434441 W
SFO1      400.1324710 MHz
SI        32768
SF        400.1300084 MHz
WDW       EM
SSB       0
LB        0.30 Hz
GB        0
PC        1.00
```

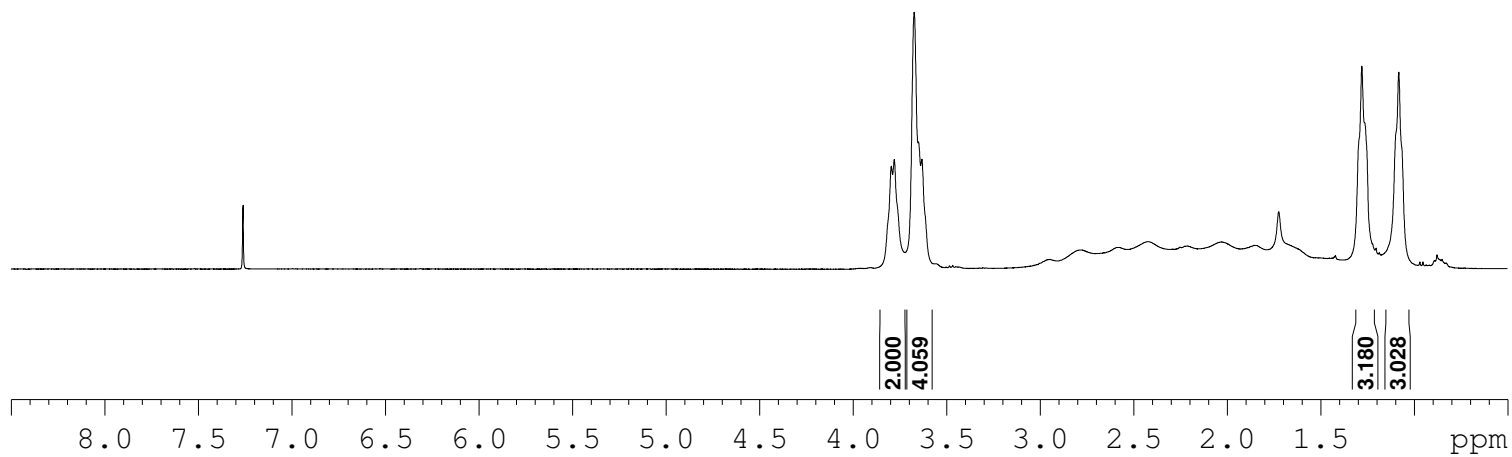

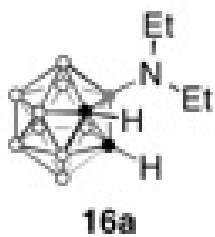

77.478  
77.160  
76.843

55.434

48.429

39.559

14.545  
11.162

ZD-719-CDC13-C

Bruker Advance III 400

```

NAME      ZD-719-CDC13-C
EXPNO     1
PROCNO    1
Date_     20140806
Time      17.04
INSTRUM   spect
PROBHD    5 mm PADUL 13C
PULPROG   zgdc
TD         131072
SOLVENT   CDC13
NS         80
DS         0
SWH        29761.904 Hz
FIDRES     0.227065 Hz
AQ         2.2020595 sec
RG         203
DW         16.800 usec
DE         6.50 usec
TE         294.1 K
D1         1.00000000 sec
D11        0.03000000 sec
TD0        1
  
```

```

===== CHANNEL f1 =====
NUC1      13C
P1         9.68 usec
PL1        -0.60 dB
PL1W      41.24164963 W
SFO1      100.6227690 MHz
  
```

```

===== CHANNEL f2 =====
CPDPRG2   waltz16
NUC2       1H
PCPD2      90.00 usec
PL2         0.00 dB
PL12       15.66 dB
PL2W       8.31434441 W
PL12W      0.22585411 W
SFO2       400.1320007 MHz
SI          131072
SF          100.6127570 MHz
WDW         EM
SSB         0
LB          1.00 Hz
GB          0
PC          1.40
  
```

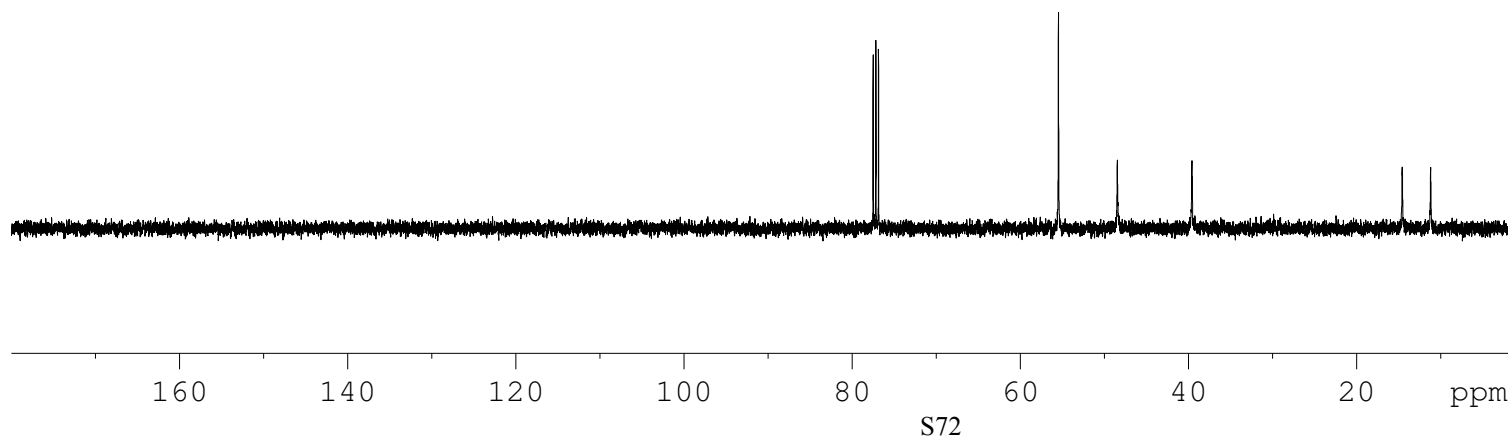



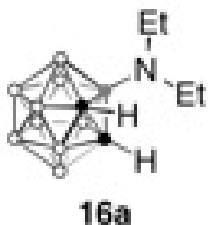

— -1.14      — -4.47      — -10.94      — -13.72      — -14.93      — -16.27

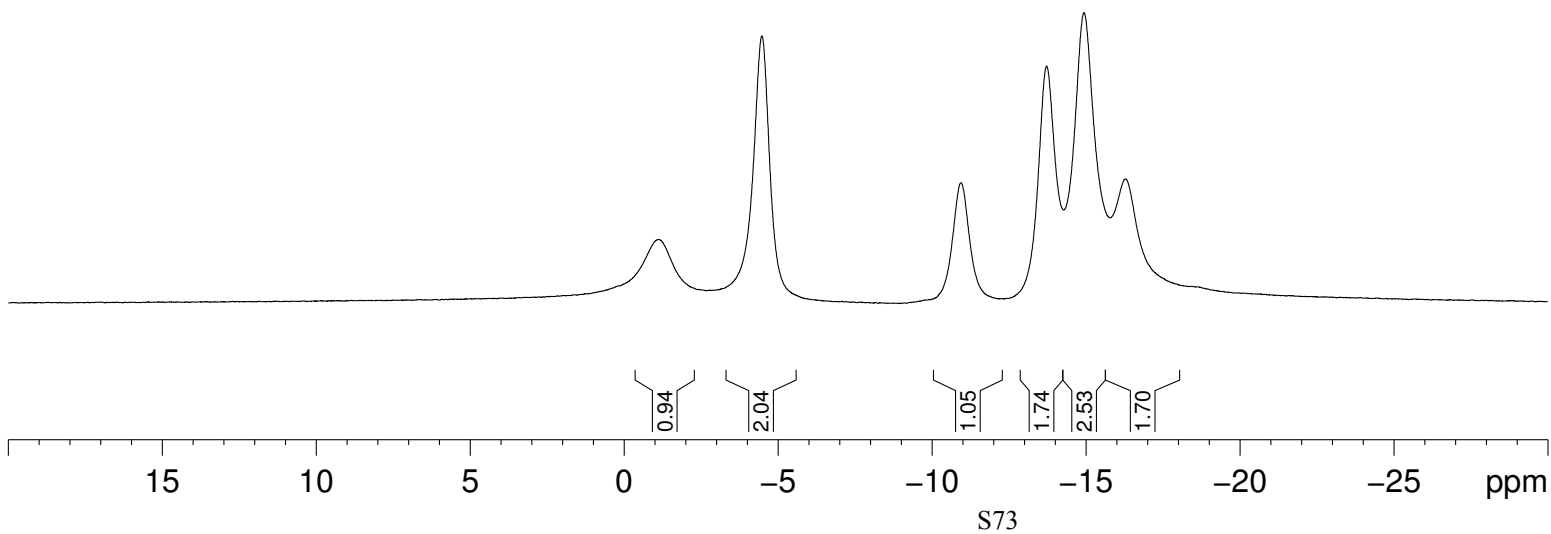

ZD-719-CDC13-B (de)

```

NAME      ZD-719-CDC13-B (de)
EXPNO     1
PROCNO    1
Date_     20140806
Time      17.11
INSTRUM   spect
PROBHD    5 mm PABBO BB-
PULPROG   zgdc
TD        65536
SOLVENT   CDC13
NS        12
DS        0
SWH       25510.203 Hz
FIDRES    0.389255 Hz
AQ        1.2845556 sec
RG        203
DW        19.600 usec
DE        6.50 usec
TE        298.3 K
D1        5.0000000 sec
D11       0.03000000 sec
TD0       1
  
```

```

===== CHANNEL f1 =====
NUC1      11B
P1        7.60 usec
PL1       -3.00 dB
PL1W      55.13059616 W
SFO1      128.3968556 MHz
  
```

```

===== CHANNEL f2 =====
CPDPRG2   waltz16
NUC2      1H
PCPD2     90.00 usec
PL2       -1.00 dB
PL12      15.16 dB
PL2W      13.56617069 W
PL12W     0.32844096 W
SFO2      400.1916008 MHz
SI        32768
SF        128.3968847 MHz
WDW       EM
SSB       0
LB        3.00 Hz
GB        0
PC        1.40
  
```



— -1.11  
 — -3.87  
 — -5.03  
  
 — -10.35  
 — -11.53  
 — -13.09  
 — -14.31  
 — -15.62  
 — -16.82

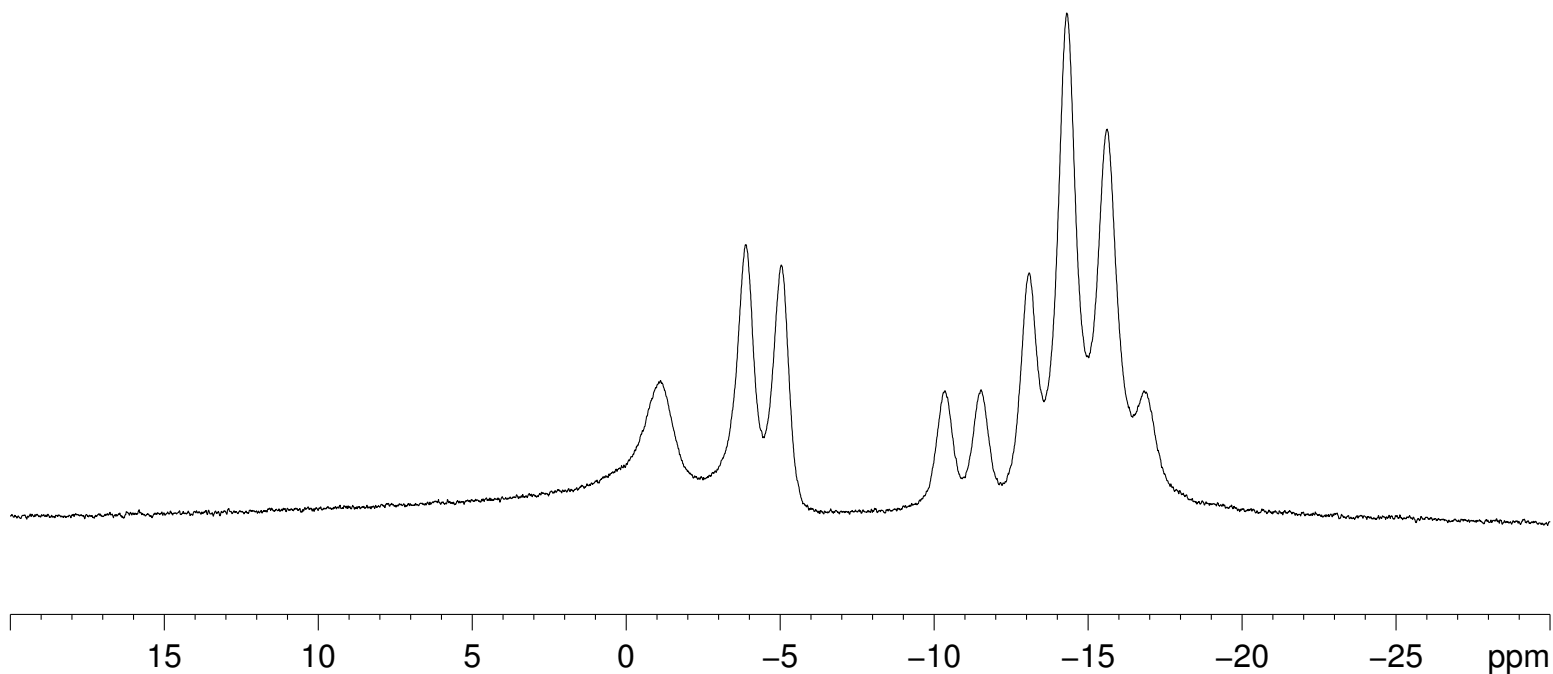

ZD-719-CDC13-B (c)

```

NAME      ZD-719-CDC13-B (c)
EXPNO     1
PROCNO    1
Date_     20140806
Time      17.12
INSTRUM   spect
PROBHD    5 mm PABBO BB-
PULPROG   zg30
TD        65536
SOLVENT   CDC13
NS        4
DS        0
SWH       25510.203 Hz
FIDRES    0.389255 Hz
AQ        1.2845556 sec
RG        161
DW        19.600 usec
DE        6.50 usec
TE        298.0 K
D1        5.00000000 sec
TD0       1
  
```

```

===== CHANNEL f1 =====
NUC1      13B
P1        7.60 usec
PL1       -3.00 dB
PL1W      55.13059616 W
SFO1     128.3968556 MHz
SI        32768
SF        128.3968865 MHz
WDW       EM
SSB       0
LB        3.00 Hz
GB        0
PC        1.40
  
```

7.260

3.468  
3.450  
3.429  
3.412  
3.395  
3.378

1.189  
1.172

ZD-720-CDC13-H

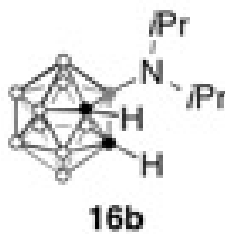

NAME ZD-720-CDC13-H  
EXPNO 1  
PROCNO 1  
Date\_ 20140807  
Time 11.25  
INSTRUM spect  
PROBHD 5 mm PABBO BB-  
PULPROG zg30  
TD 65536  
SOLVENT CDCl3  
NS 8  
DS 2  
SWH 8223.685 Hz  
FIDRES 0.125483 Hz  
AQ 3.9846387 sec  
RG 71.8  
DW 60.800 usec  
DE 6.50 usec  
TE 297.9 K  
D1 1.00000000 sec  
TD0 1

===== CHANNEL f1 =====  
NUC1 1H  
P1 14.00 usec  
PL1 -1.00 dB  
PL1W 13.56617069 W  
SFO1 400.1924713 MHz  
SI 32768  
SF 400.1900149 MHz  
WDW EM  
SSB 0  
LB 0.30 Hz  
GB 0  
PC 1.00

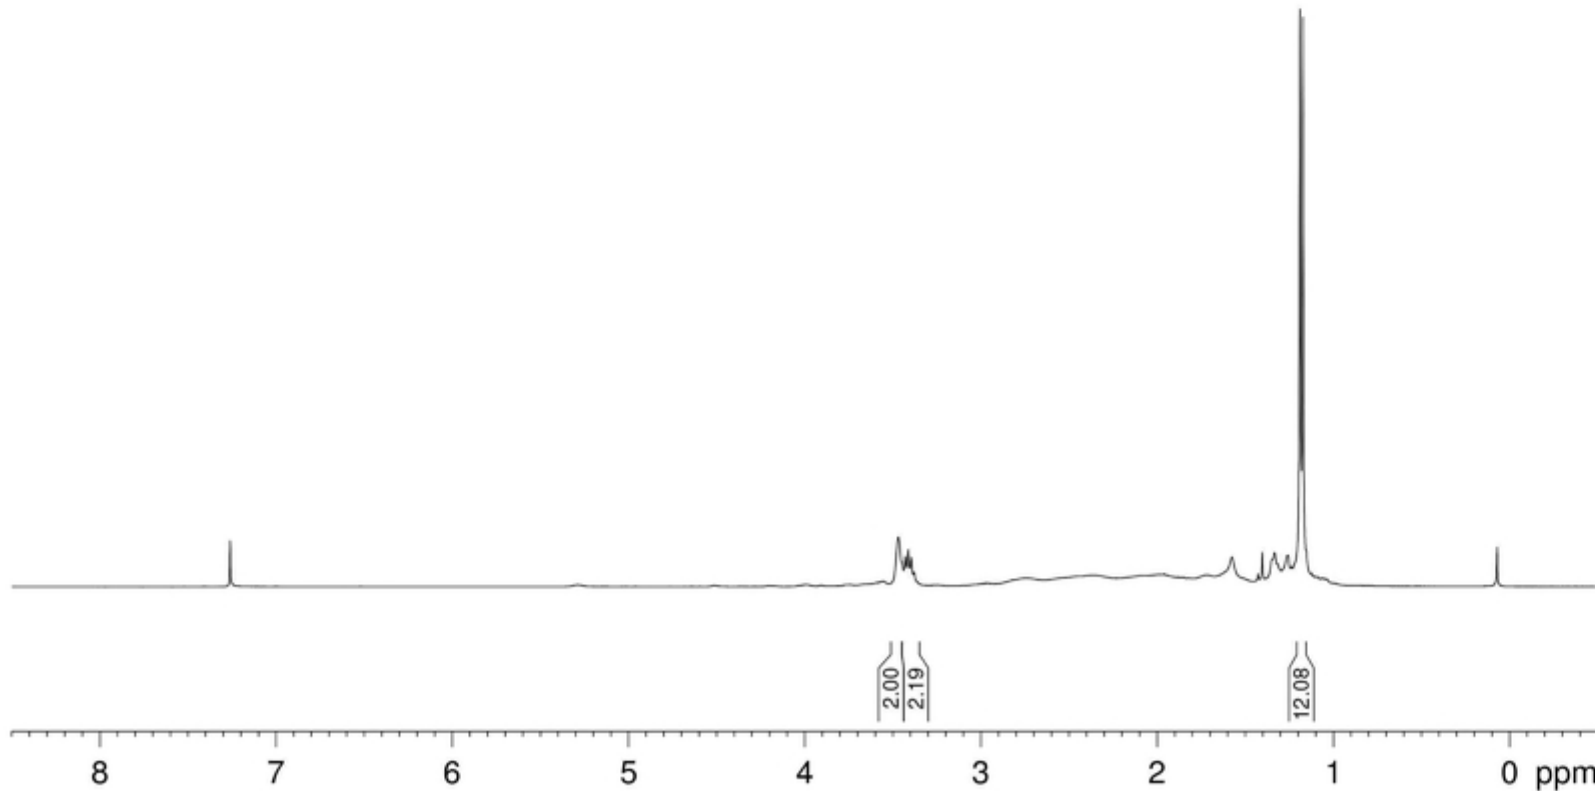

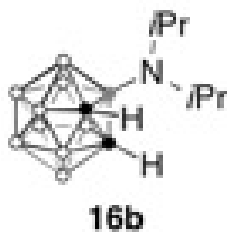

77.48  
77.16  
76.84  
56.76  
48.99  
22.56

ZD-720-CDC13-C

```

NAME      ZD-720-CDC13-C
EXPNO     1
PROCNO    1
Date_     20140807
Time      11.30
INSTRUM   spect
PROBHD    5 mm PABBO BB-
PULPROG   zgpg30
TD        65536
SOLVENT   CDC13
NS        684
DS        4
SWH       24038.461 Hz
FIDRES    0.366798 Hz
AQ        1.3631988 sec
RG        181
DW        20.800 usec
DE        6.50 usec
TE        298.3 K
D1        2.00000000 sec
D11       0.03000000 sec
TD0       1
  
```

```

----- CHANNEL f1 -----
NUC1      13C
P1        9.90 usec
PL1       -2.00 dB
PL1W      55.33689499 W
SFO1      100.6379183 MHz
  
```

```

----- CHANNEL f2 -----
CPDPRG2   waltz16
NUC2      1H
PCPD2     90.00 usec
PL2       -1.00 dB
PL12      15.16 dB
PL13      18.62 dB
PL2W      13.56617069 W
PL12W     0.32844096 W
PL13W     0.14806664 W
SFO2      400.1916008 MHz
SI        32768
SF        100.6278433 MHz
WDW       EM
SSB       0
LB        1.00 Hz
GB        0
PC        1.40
  
```

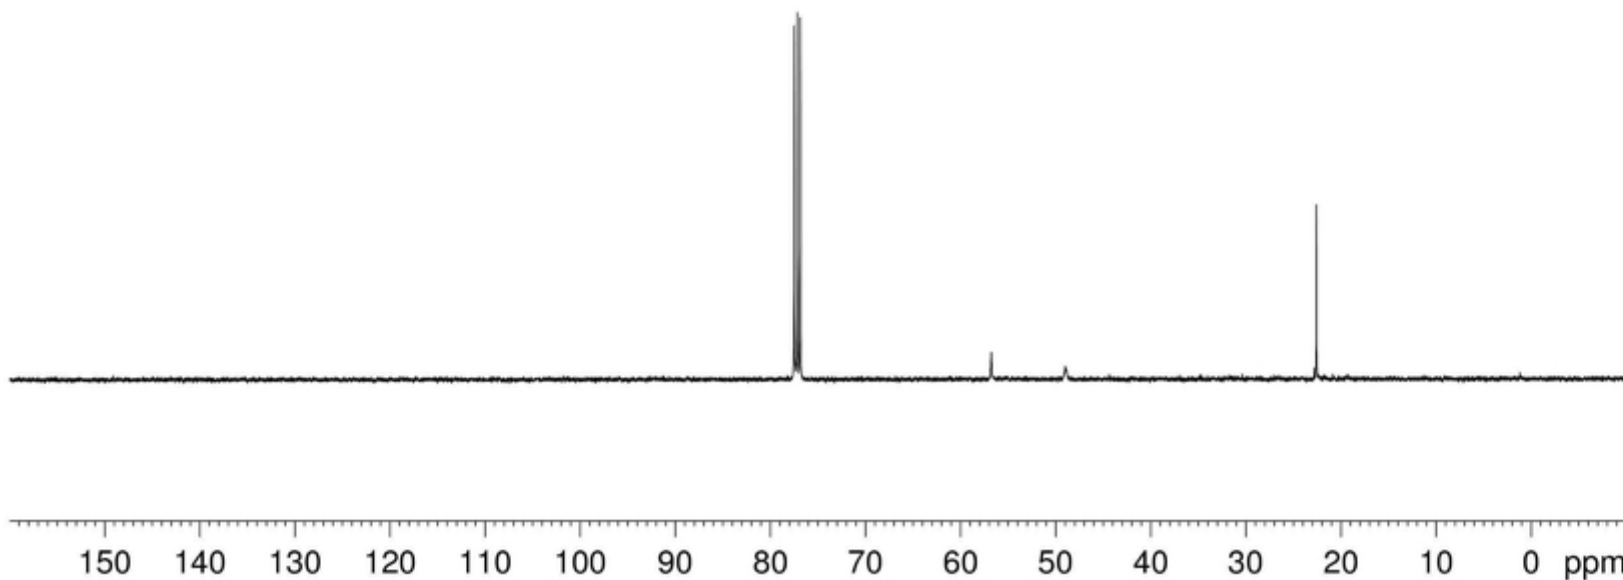

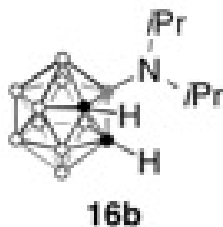

— -1.14 — -4.47 — -10.94 — -13.72 — -14.93 — -16.27

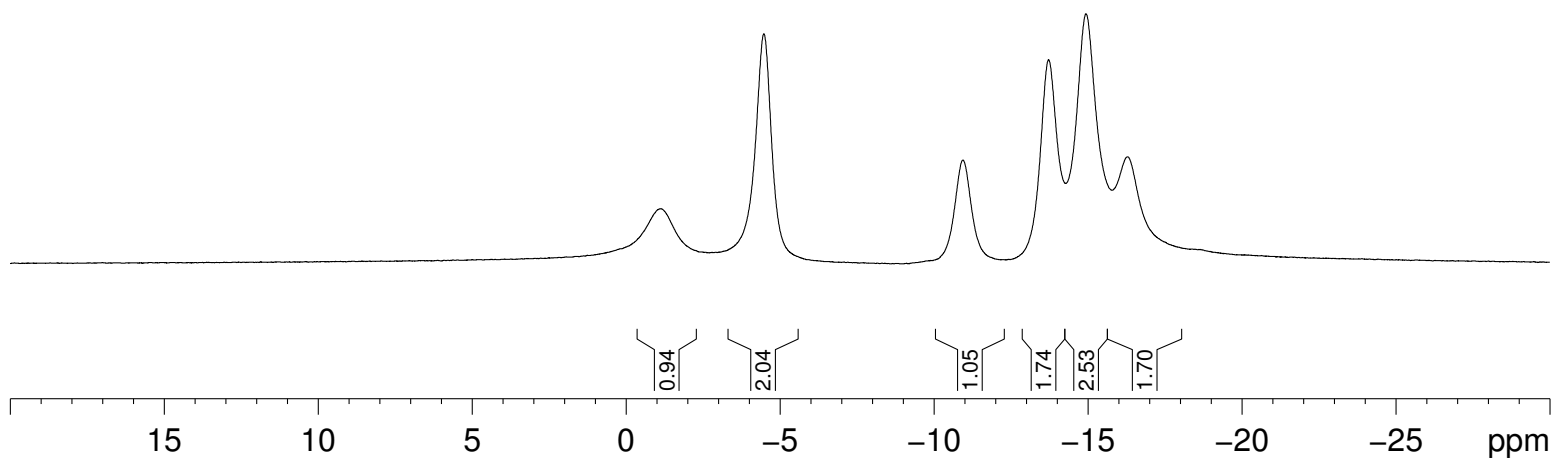

S77

ZD-720-CDCl3-B (de)

```

NAME      ZD-720-CDCl3-B (de)
EXPNO     1
PROCNO    1
Date_     20140807
Time      17.11
INSTRUM   spect
PROBHD    5 mm PABBO BB-
PULPROG   zgdc
TD        65536
SOLVENT   CDCl3
NS        12
DS        0
SWH       25510.203 Hz
FIDRES    0.389255 Hz
AQ        1.2845556 sec
RG        203
DW        19.600 usec
DE        6.50 usec
TE        298.3 K
D1        5.00000000 sec
D11       0.03000000 sec
TD0       1
  
```

```

===== CHANNEL f1 =====
NUC1      11B
P1        7.60 usec
PL1       -3.00 dB
PL1W      55.13059616 W
SFO1      128.3968556 MHz
  
```

```

===== CHANNEL f2 =====
CPDPRG2   waltz16
NUC2      1H
PCPD2     90.00 usec
PL2       -1.00 dB
PL12      15.16 dB
PL2W      13.56617069 W
PL12W     0.32844096 W
SFO2      400.1916008 MHz
SI        32768
SF        128.3968847 MHz
WDW       EM
SSB       0
LB        3.00 Hz
GB        0
PC        1.40
  
```

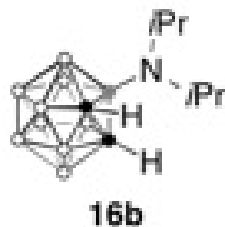

— -1.11  
 — -3.87  
 — -5.03  
  
 — -10.35  
 — -11.53  
 — -13.09  
 — -14.31  
 — -15.62  
 — -16.82

ZD-720-CDC13-B (c)

```

NAME      ZD-720-CDC13-B (c)
EXPNO     1
PROCNO    1
Date_     20140807
Time      17.12
INSTRUM   spect
PROBHD    5 mm PABBO BB-
PULPROG   zg30
TD        65536
SOLVENT   CDC13
NS        4
DS        0
SWH       25510.203 Hz
FIDRES    0.389255 Hz
AQ        1.2845556 sec
RG        161
DW        19.600 usec
DE        6.50 usec
TE        298.0 K
D1        5.00000000 sec
TD0       1
  
```

```

===== CHANNEL f1 =====
NUC1      11B
P1        7.60 usec
PL1       -3.00 dB
PL1W      55.13059616 W
SF01      128.3968556 MHz
SI        32768
SF        128.3968865 MHz
WDW       EM
SSB       0
LB        3.00 Hz
GB        0
PC        1.40
  
```

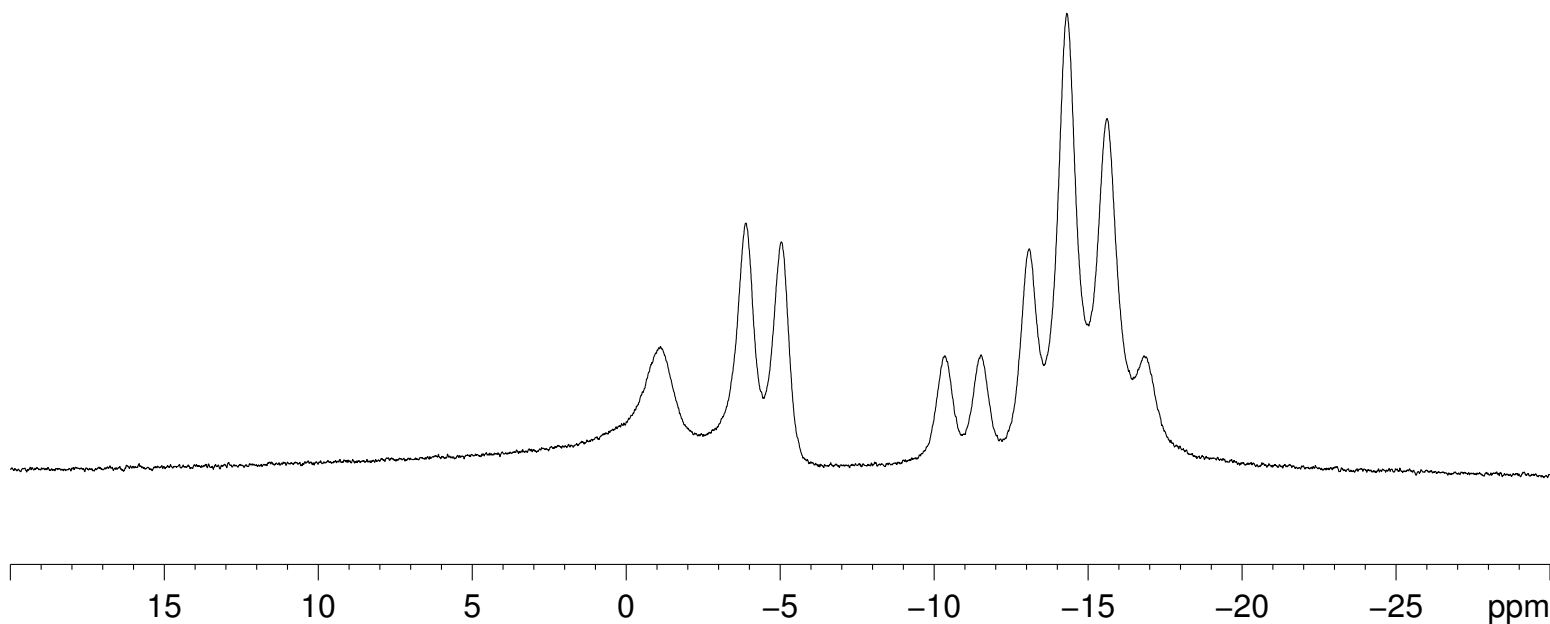

7.260

3.693  
3.561

ZD-732-CDCl3-H

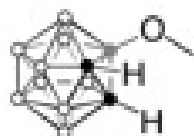

17a

NAME ZD-732-CDCl3-H  
EXPNO 1  
PROCNO 1  
Date\_ 20140812  
Time 20.26  
INSTRUM spect  
PROBHD 5 mm PABBO BB-  
PULPROG zg30  
TD 65536  
SOLVENT CDCl3  
NS 8  
DS 2  
SWH 8223.685 Hz  
FIDRES 0.125483 Hz  
AQ 3.9846387 sec  
RG 144  
DW 60.800 usec  
DE 6.50 usec  
TE 297.0 K  
D1 1.00000000 sec  
TD0 1

===== CHANNEL f1 =====  
NUC1 1H  
P1 14.00 usec  
PL1 -1.00 dB  
PL1W 13.56617069 W  
SFO1 400.1924713 MHz  
SI 32768  
SF 400.1900153 MHz  
WDW EM  
SSB 0  
LB 0.30 Hz  
GB 0  
PC 1.00

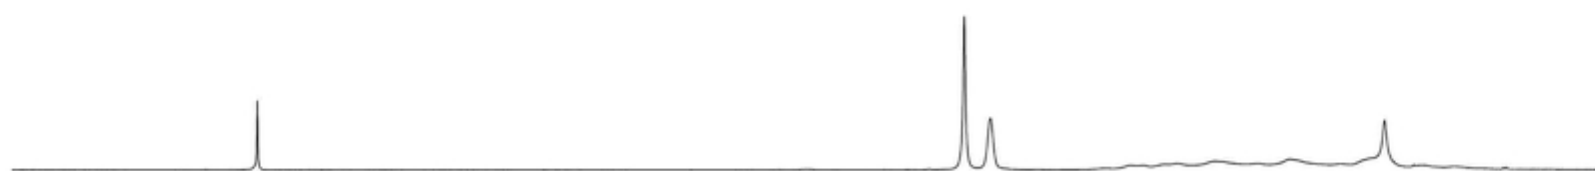

3.03  
2.00

8.0 7.5 7.0 6.5 6.0 5.5 5.0 4.5 4.0 3.5 3.0 2.5 2.0 1.5 ppm

ZD-732-CDC13-C

Bruker Advance III 400

```
NAME      ZD-732-CDC13-C
EXPNO     1
PROCNO    1
Date_     20140812
Time      20.37
INSTRUM   spect
PROBHD    5 mm PADUL 13C
PULPROG   zgdc
TD         131072
SOLVENT   CDC13
NS         300
DS         0
SWH       29761.904 Hz
FIDRES    0.227065 Hz
AQ         2.2020595 sec
RG         203
DW         16.800 usec
DE         6.50 usec
TE         294.0 K
D1         1.00000000 sec
D11        0.03000000 sec
TD0        1
```

```
----- CHANNEL f1 -----
NUC1      13C
P1         9.68 usec
PL1        -0.60 dB
PL1W      41.24164963 W
SFO1      100.6227690 MHz
```

```
----- CHANNEL f2 -----
CPDPRG2   waltz16
NUC2       1H
PCPD2      90.00 usec
PL2         0.00 dB
PL12       15.66 dB
PL2W       8.31434441 W
PL12W      0.22585411 W
SFO2      400.1320007 MHz
SI         131072
SF         100.6127553 MHz
WDW        EM
SSB         0
LB          1.00 Hz
GB          0
PC          1.40
```

77.477  
77.160  
76.842

57.434  
55.906

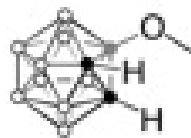

17a

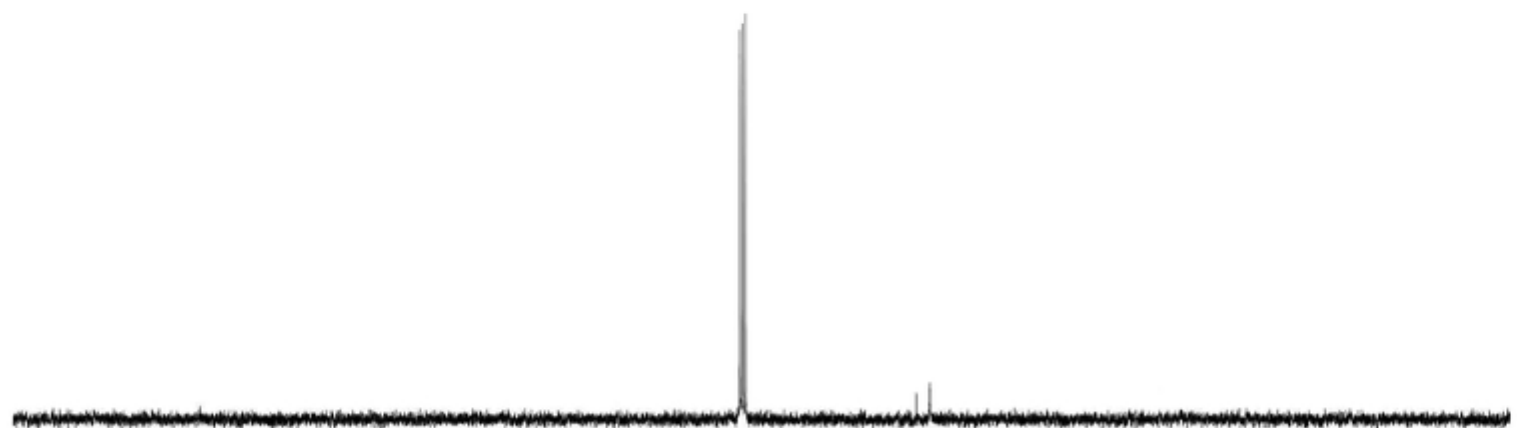

150 140 130 120 110 100 90 80 70 60 50 40 30 20 10 0 ppm



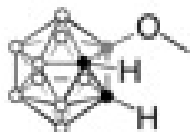

17a

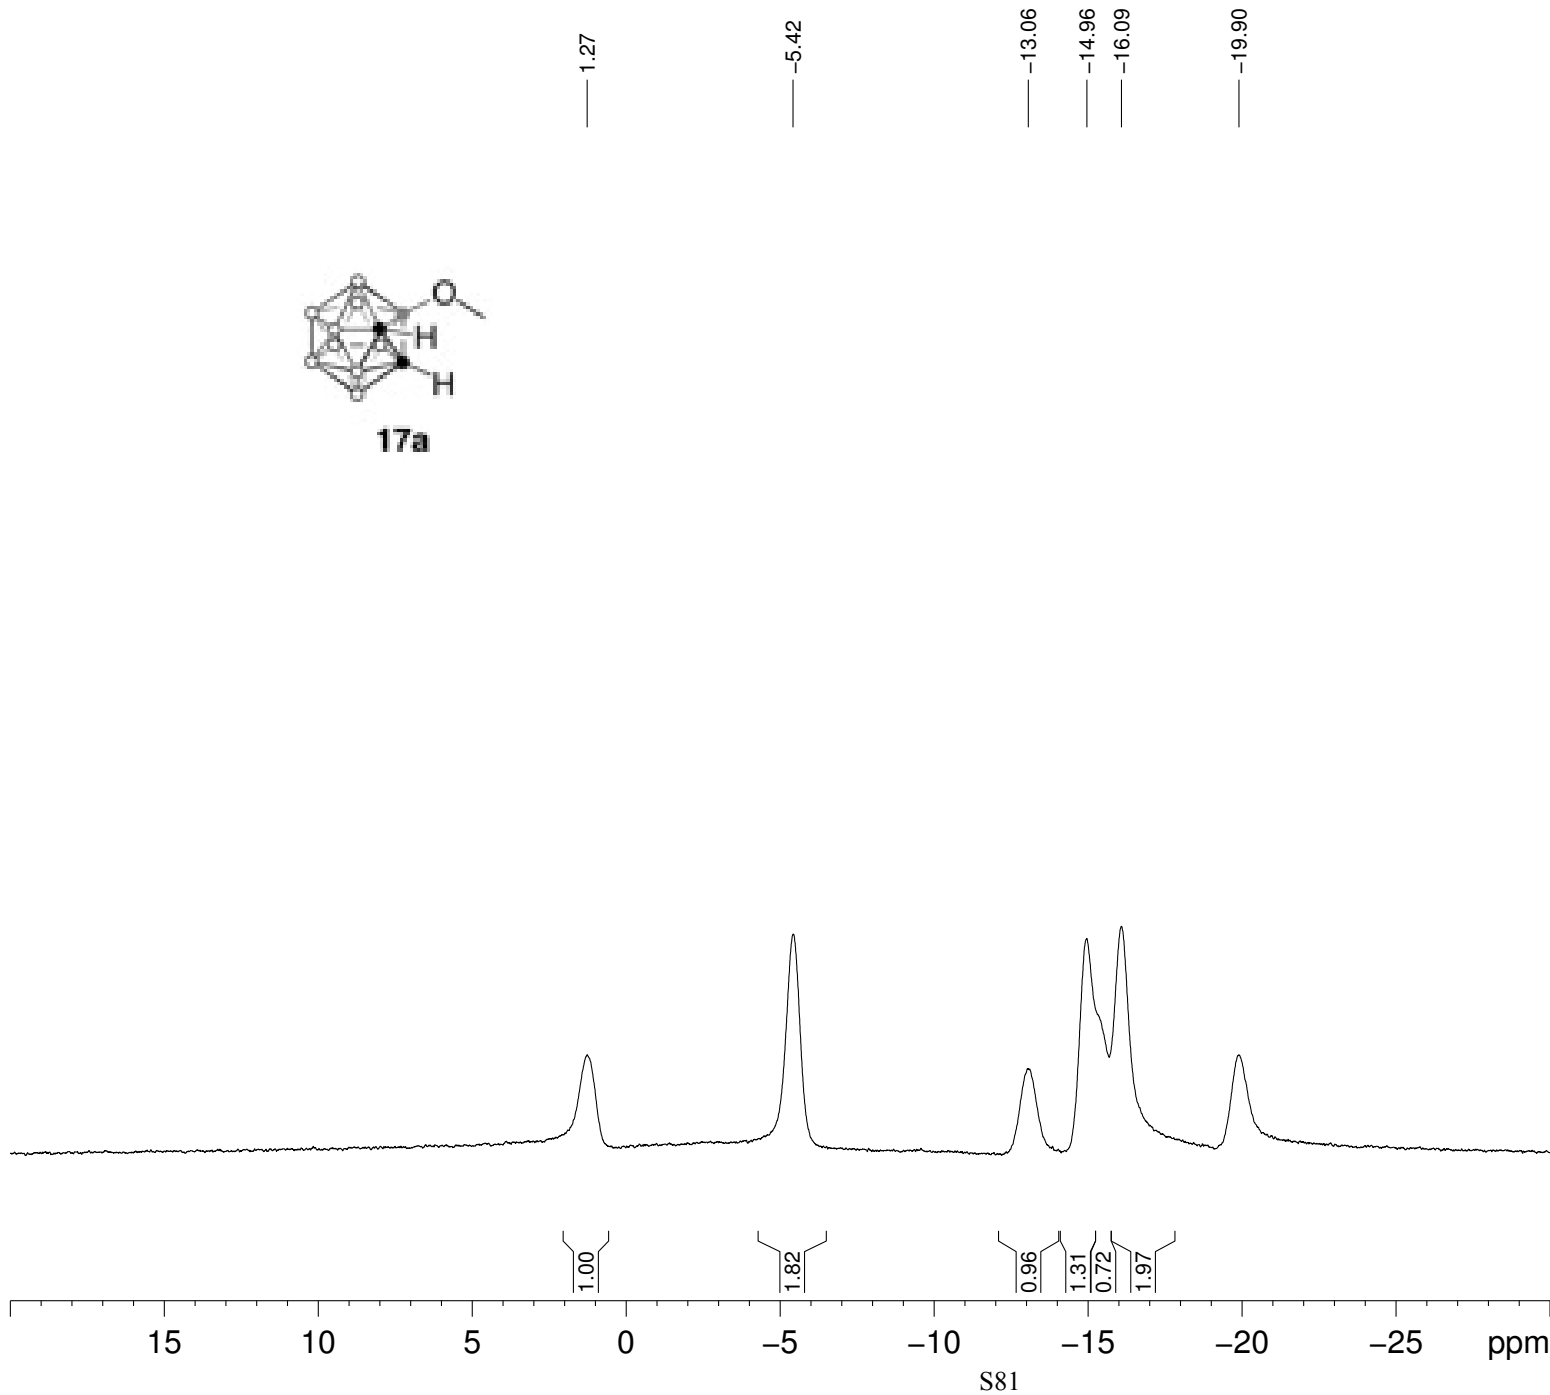

ZD-732-CDC13-B (de)

```

NAME      ZD-732-CDC13-B (de)
EXPNO     1
PROCNO    1
Date_     20140812
Time      20.28
INSTRUM   spect
PROBHD    5 mm PABBO BB-
PULPROG   zgdc
TD        65536
SOLVENT   CDC13
NS        4
DS        0
SWH       25510.203 Hz
FIDRES    0.389255 Hz
AQ        1.2845556 sec
RG        322
DW        19.600 usec
DE        6.50 usec
TE        297.3 K
D1        5.00000000 sec
D11       0.03000000 sec
TD0       1
  
```

```

===== CHANNEL f1 =====
NUC1      11B
P1        7.60 usec
PL1       -3.00 dB
PL1W      55.13059616 W
SFO1      128.3968556 MHz
  
```

```

===== CHANNEL f2 =====
CPDPRG2   waltz16
NUC2      1H
PCPD2     90.00 usec
PL2       -1.00 dB
PL12      15.16 dB
PL2W      13.56617069 W
PL12W     0.32844096 W
SFO2      400.1916008 MHz
SI        32768
SF        128.3968847 MHz
WDW       EM
SSB       0
LB        3.00 Hz
GB        0
PC        1.40
  
```

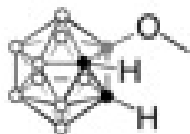

17a

— 1.22  
 — 4.86  
 — 6.04  
 — 12.45  
 — 14.33  
 — 15.53  
 — 16.70  
 — 19.31  
 — 20.52

ZD-732-CDC13-B (c)

```

NAME      ZD-732-CDC13-B (c)
EXPNO     1
PROCNO    1
Date_     20140812
Time      20.29
INSTRUM   spect
PROBHD    5 mm PABBO BB-
PULPROG   zg30
TD         65536
SOLVENT   CDC13
NS         12
DS         0
SWH        25510.203 Hz
FIDRES     0.389255 Hz
AQ         1.2845556 sec
RG         161
DW         19.600 usec
DE         6.50 usec
TE         297.0 K
D1         5.00000000 sec
TD0        1
  
```

```

===== CHANNEL f1 =====
NUC1       11B
P1         7.60 usec
PL1        -3.00 dB
PL1W       55.13059616 W
SFO1       128.3968556 MHz
SI         32768
SF         128.3968865 MHz
WDW        EM
SSB        0
LB         3.00 Hz
GB         0
PC         1.40
  
```

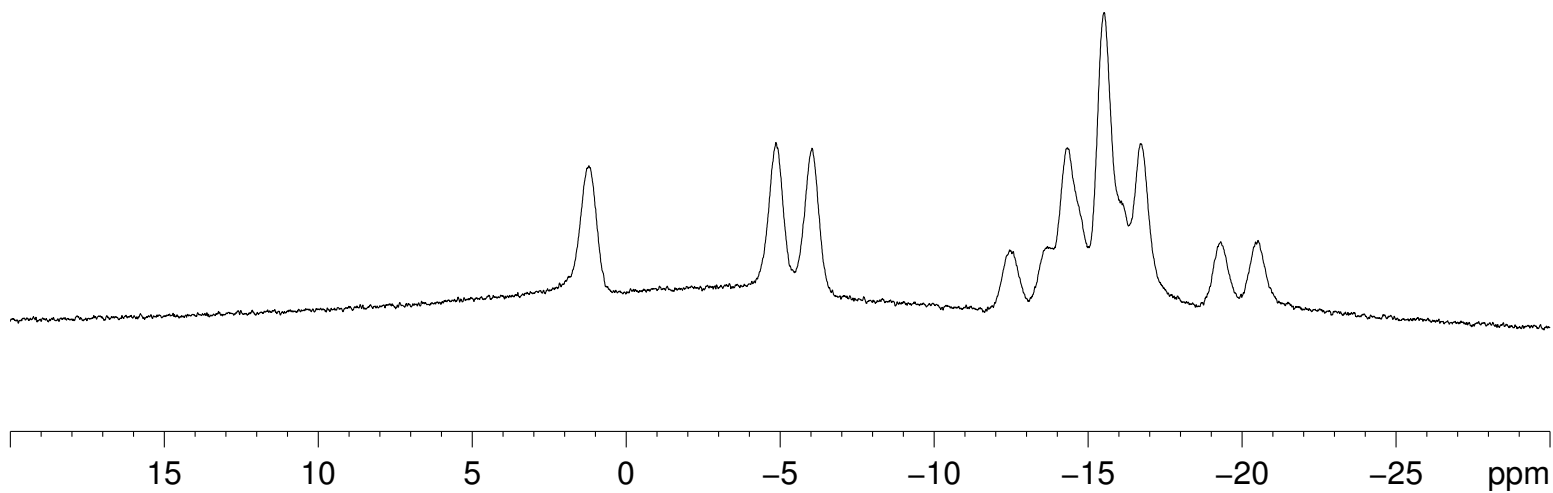

7.260

4.350  
4.335  
4.320  
4.305  
4.290

3.533

1.276  
1.261

ZD-733-CDC13-H

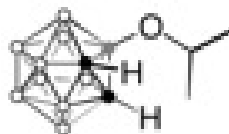

17b

NAME ZD-733-CDC13-H  
EXPNO 1  
PROCNO 1  
Date\_ 20140814  
Time 16.02  
INSTRUM spect  
PROBHD 5 mm PABBO BB-  
PULPROG zg30  
TD 65536  
SOLVENT CDCl3  
NS 16  
DS 2  
SWH 8223.685 Hz  
FIDRES 0.125483 Hz  
AQ 3.9846387 sec  
RG 144  
DW 60.800 usec  
DE 6.50 usec  
TE 297.2 K  
D1 1.00000000 sec  
TD0 1

===== CHANNEL f1 =====  
NUC1 1H  
P1 14.00 usec  
PL1 -1.00 dB  
PL1W 13.56617069 W  
SFO1 400.1924713 MHz  
SI 32768  
SF 400.1900154 MHz  
WDW EM  
SSB 0  
LB 0.30 Hz  
GB 0  
PC 1.00

water →

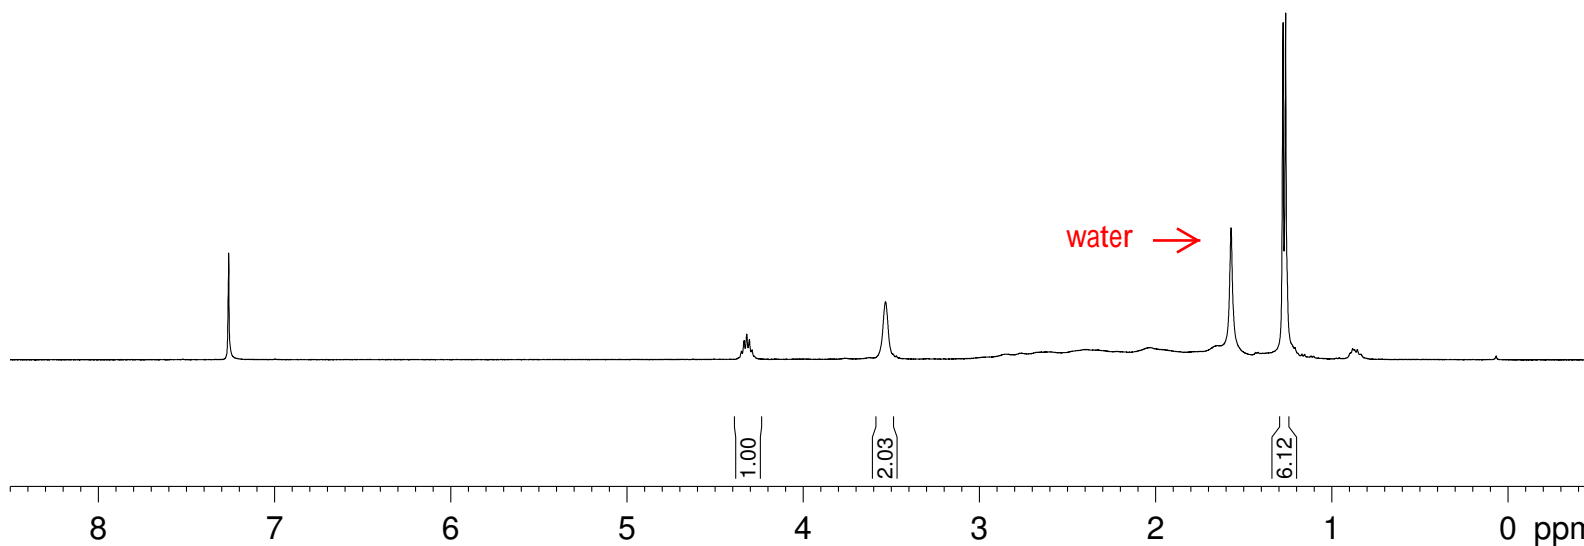

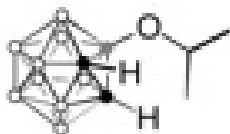

17b

77.48  
77.16  
76.84  
72.99

56.05

24.22

ZD-733-CDC13-C

```

NAME      ZD-733-CDC13-C
EXPNO     1
PROCNO    1
Date_     20140814
Time      16.07
INSTRUM   spect
PROBHD    5 mm PABBO BB-
PULPROG   zgpg30
TD         65536
SOLVENT   CDC13
NS         300
DS         4
SWH        24038.461 Hz
FIDRES     0.366798 Hz
AQ         1.3631988 sec
RG         181
DW         20.800 usec
DE         6.50 usec
TE         297.8 K
D1         2.00000000 sec
D11        0.03000000 sec
TD0        1
  
```

```

===== CHANNEL f1 =====
NUC1       13C
P1         9.90 usec
PL1        -2.00 dB
PL1W       55.33689499 W
SFO1       100.6379183 MHz
  
```

```

===== CHANNEL f2 =====
CPDPRG2    waltz16
NUC2       1H
PCPD2      90.00 usec
PL2        -1.00 dB
PL12       15.16 dB
PL13       18.62 dB
PL2W       13.56617069 W
PL12W      0.32844096 W
PL13W      0.14806664 W
SFO2       400.1916008 MHz
SI         32768
SF         100.6278429 MHz
WDW        EM
SSB        0
LB         1.00 Hz
GB         0
PC         1.40
  
```

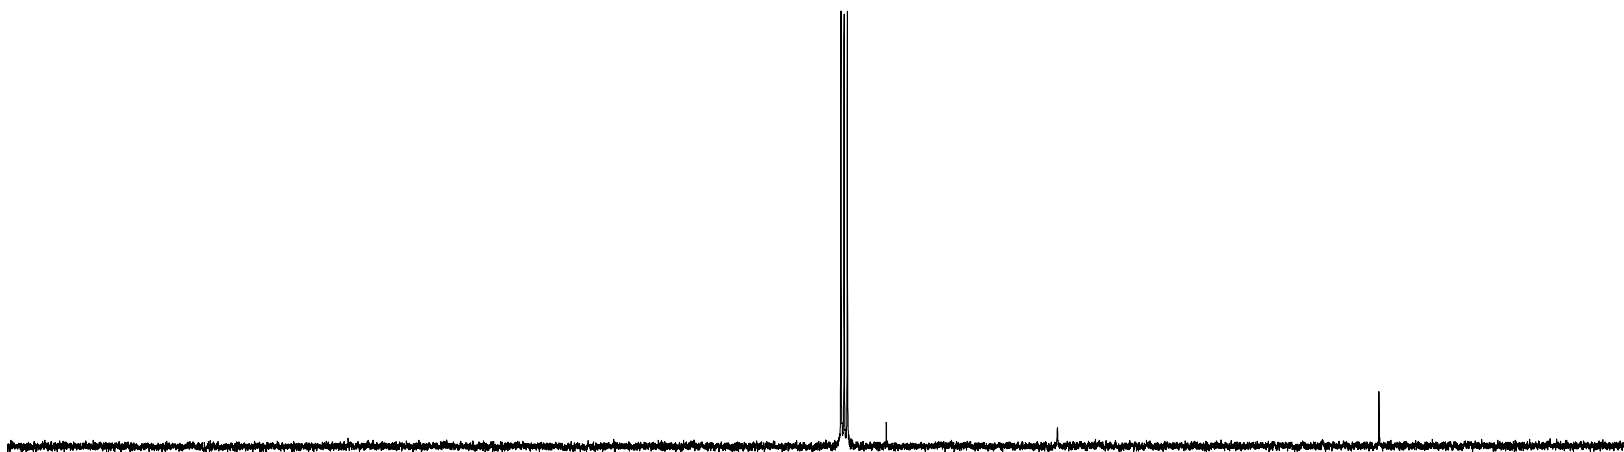

150 140 130 120 110 100 90 80 70 60 50 40 30 20 10 ppm

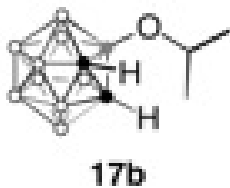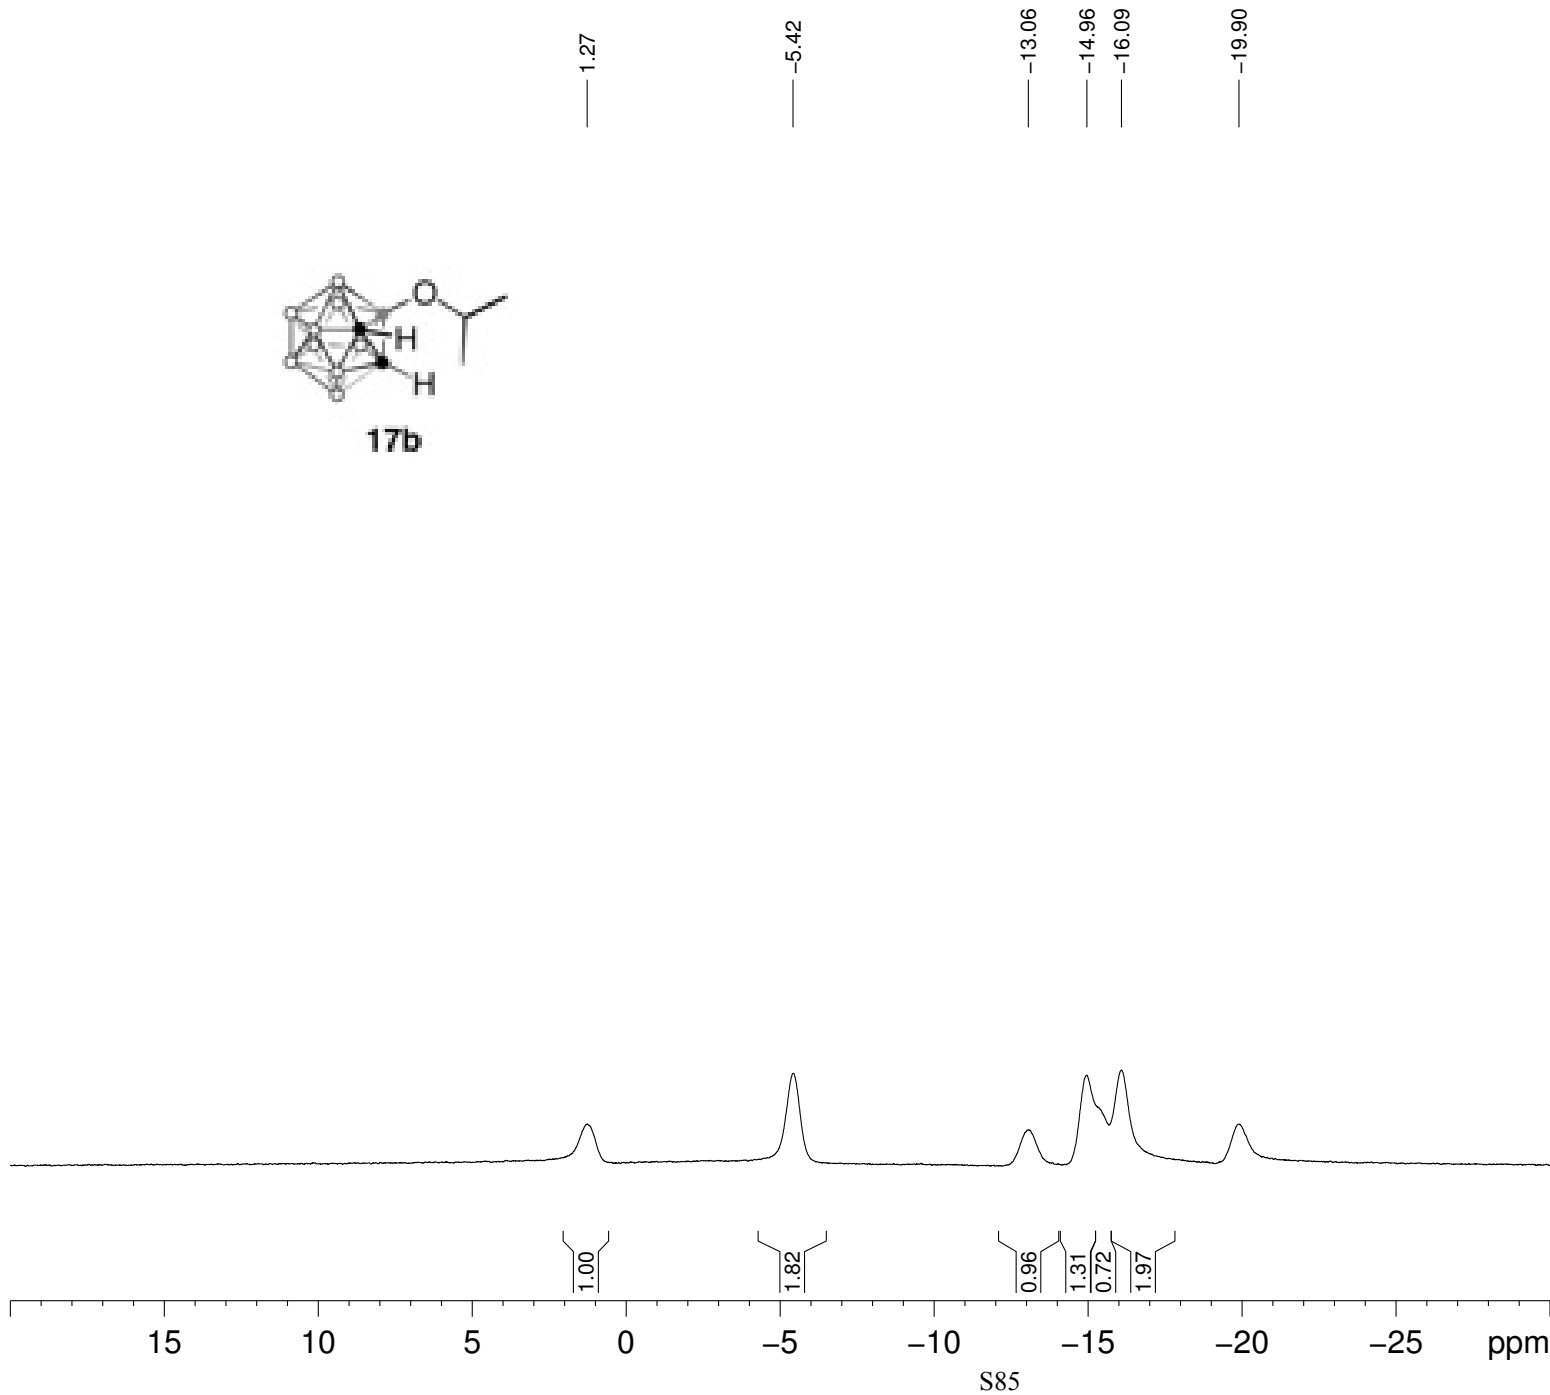

S85

ZD-733-CDCl3-B (de)

```

NAME      ZD-733-CDCl3-B (de)
EXPNO     1
PROCNO    1
Date_     20140814
Time      16.28
INSTRUM   spect
PROBHD    5 mm PABBO BB-
PULPROG   zgdc
TD         65536
SOLVENT   CDC13
NS         4
DS         0
SWH        25510.203 Hz
FIDRES     0.389255 Hz
AQ         1.2845556 sec
RG         322
DW         19.600 usec
DE         6.50 usec
TE         297.3 K
D1         5.0000000 sec
D11        0.0300000 sec
TD0        1
  
```

```

===== CHANNEL f1 =====
NUC1      11B
P1         7.60 usec
PL1        -3.00 dB
PL1W      55.13059616 W
SFO1      128.3968556 MHz
  
```

```

===== CHANNEL f2 =====
CPDPRG2   waltz16
NUC2       1H
PCPD2     90.00 usec
PL2        -1.00 dB
PL12       15.16 dB
PL2W      13.56617069 W
PL12W     0.32844096 W
SFO2      400.1916008 MHz
SI         32768
SF         128.3968847 MHz
WDW        EM
SSB         0
LB          3.00 Hz
GB          0
PC          1.40
  
```

ZD-733-CDC13-B (c)

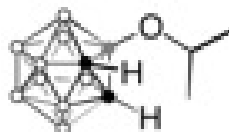

17b

— 1.22  
— -4.86  
— -6.04  
— -12.45  
— -14.33  
— -15.53  
— -16.70  
— -19.31  
— -20.52

NAME ZD-733-CDC13-B (c)  
EXPNO 1  
PROCNO 1  
Date\_ 20140814  
Time 16.29  
INSTRUM spect  
PROBHD 5 mm PABBO BB-  
PULPROG zg30  
TD 65536  
SOLVENT CDC13  
NS 12  
DS 0  
SWH 25510.203 Hz  
FIDRES 0.389255 Hz  
AQ 1.2845556 sec  
RG 161  
DW 19.600 usec  
DE 6.50 usec  
TE 297.0 K  
D1 5.00000000 sec  
TDO 1

==== CHANNEL f1 =====  
NUC1 11B  
P1 7.60 usec  
PL1 -3.00 dB  
PL1W 55.13059616 W  
SFO1 128.3968556 MHz  
SI 32768  
SF 128.3968865 MHz  
WDW EM  
SSB 0  
LB 3.00 Hz  
GB 0  
PC 1.40

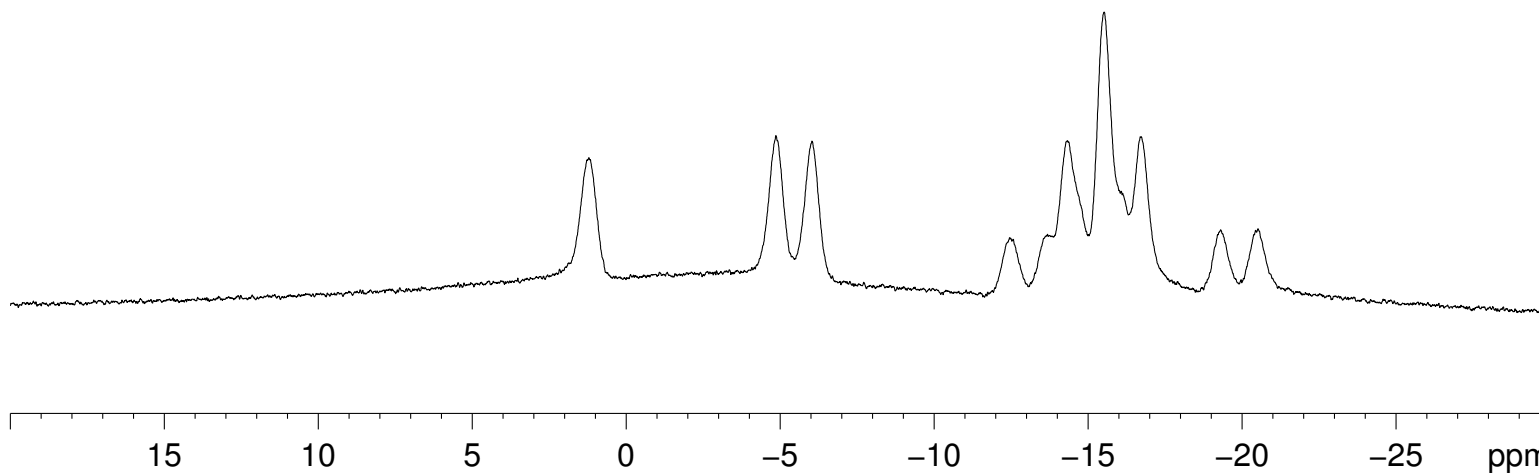

7.260

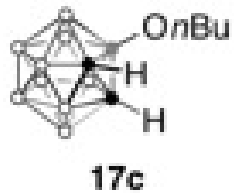

3.905  
3.889  
3.873  
3.556

1.647  
1.630  
1.613  
1.593  
1.432  
1.413  
1.394  
1.375  
1.357  
1.339  
0.959  
0.941  
0.922

ZD-746-CDC13-H

Bruker Advance III 400

```
NAME      ZD-746-CDC13-H
EXPNO     1
PROCNO    1
Date_     20140823
Time      13.22
INSTRUM   spect
PROBHD    5 mm PADUL 13C
PULPROG   zg30
TD        65536
SOLVENT   CDC13
NS        9
DS        2
SWH       8223.685 Hz
FIDRES    0.125483 Hz
AQ        3.9846387 sec
RG        203
DW        60.800 usec
DE        6.50 usec
TE        294.1 K
D1        2.00000000 sec
TD0       1
```

```
===== CHANNEL f1 =====
NUC1      1H
P1        14.83 usec
PL1       0.00 dB
PL1W      8.31434441 W
SFO1      400.1324710 MHz
SI        32768
SF        400.1300085 MHz
WDW       EM
SSB       0
LB        0.30 Hz
GB        0
PC        1.00
```

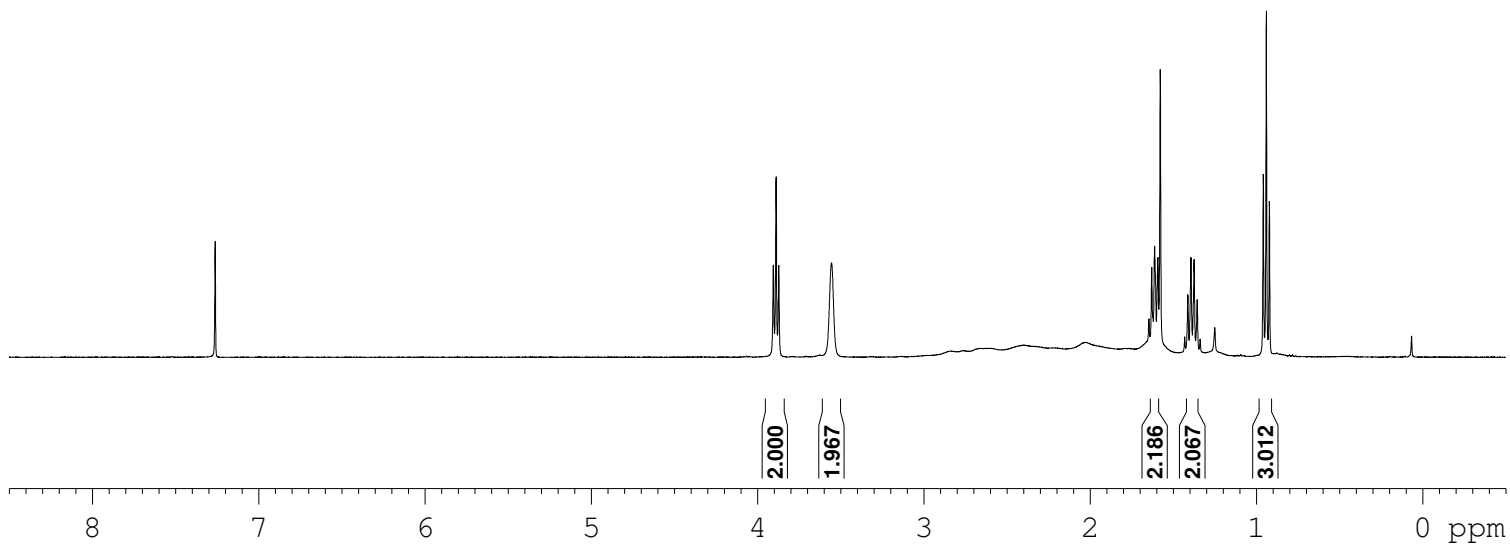

S87

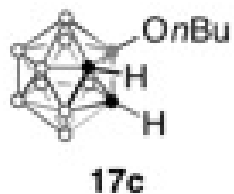

77.478  
77.160  
76.843  
70.059  
55.960  
33.283  
19.046  
13.891

ZD-746-CDC13-C

Bruker Advance III 400

```

NAME      ZD-746-CDC13-C
EXPNO     1
PROCNO    1
Date_     20140823
Time      13.24
INSTRUM   spect
PROBHD    5 mm PADUL 13C
PULPROG   zgdc
TD         131072
SOLVENT   CDC13
NS         912
DS         0
SWH       29761.904 Hz
FIDRES    0.227065 Hz
AQ         2.2020595 sec
RG         203
DW         16.800 usec
DE         6.50 usec
TE         294.3 K
D1         1.00000000 sec
D11        0.03000000 sec
TD0        1
  
```

```

===== CHANNEL f1 =====
NUC1      13C
P1         9.68 usec
PL1        -0.60 dB
PL1W      41.24164963 W
SFO1      100.6227690 MHz
  
```

```

===== CHANNEL f2 =====
CPDPRG2   waltz16
NUC2       1H
PCPD2      90.00 usec
PL2         0.00 dB
PL12        15.66 dB
PL2W       8.31434441 W
PL12W      0.22585411 W
SFO2       400.1320007 MHz
SI          131072
SF          100.6127552 MHz
WDW         EM
SSB         0
LB          1.00 Hz
GB          0
PC          1.40
  
```

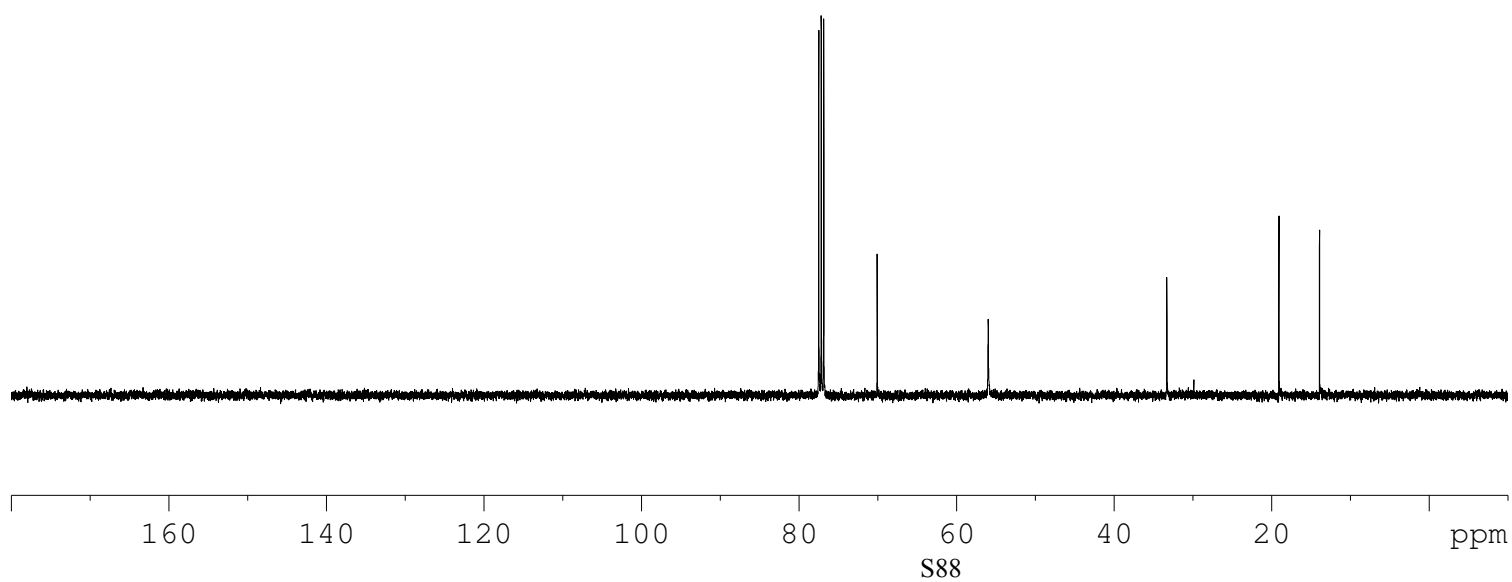



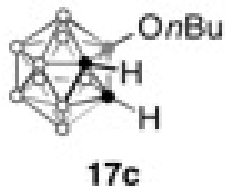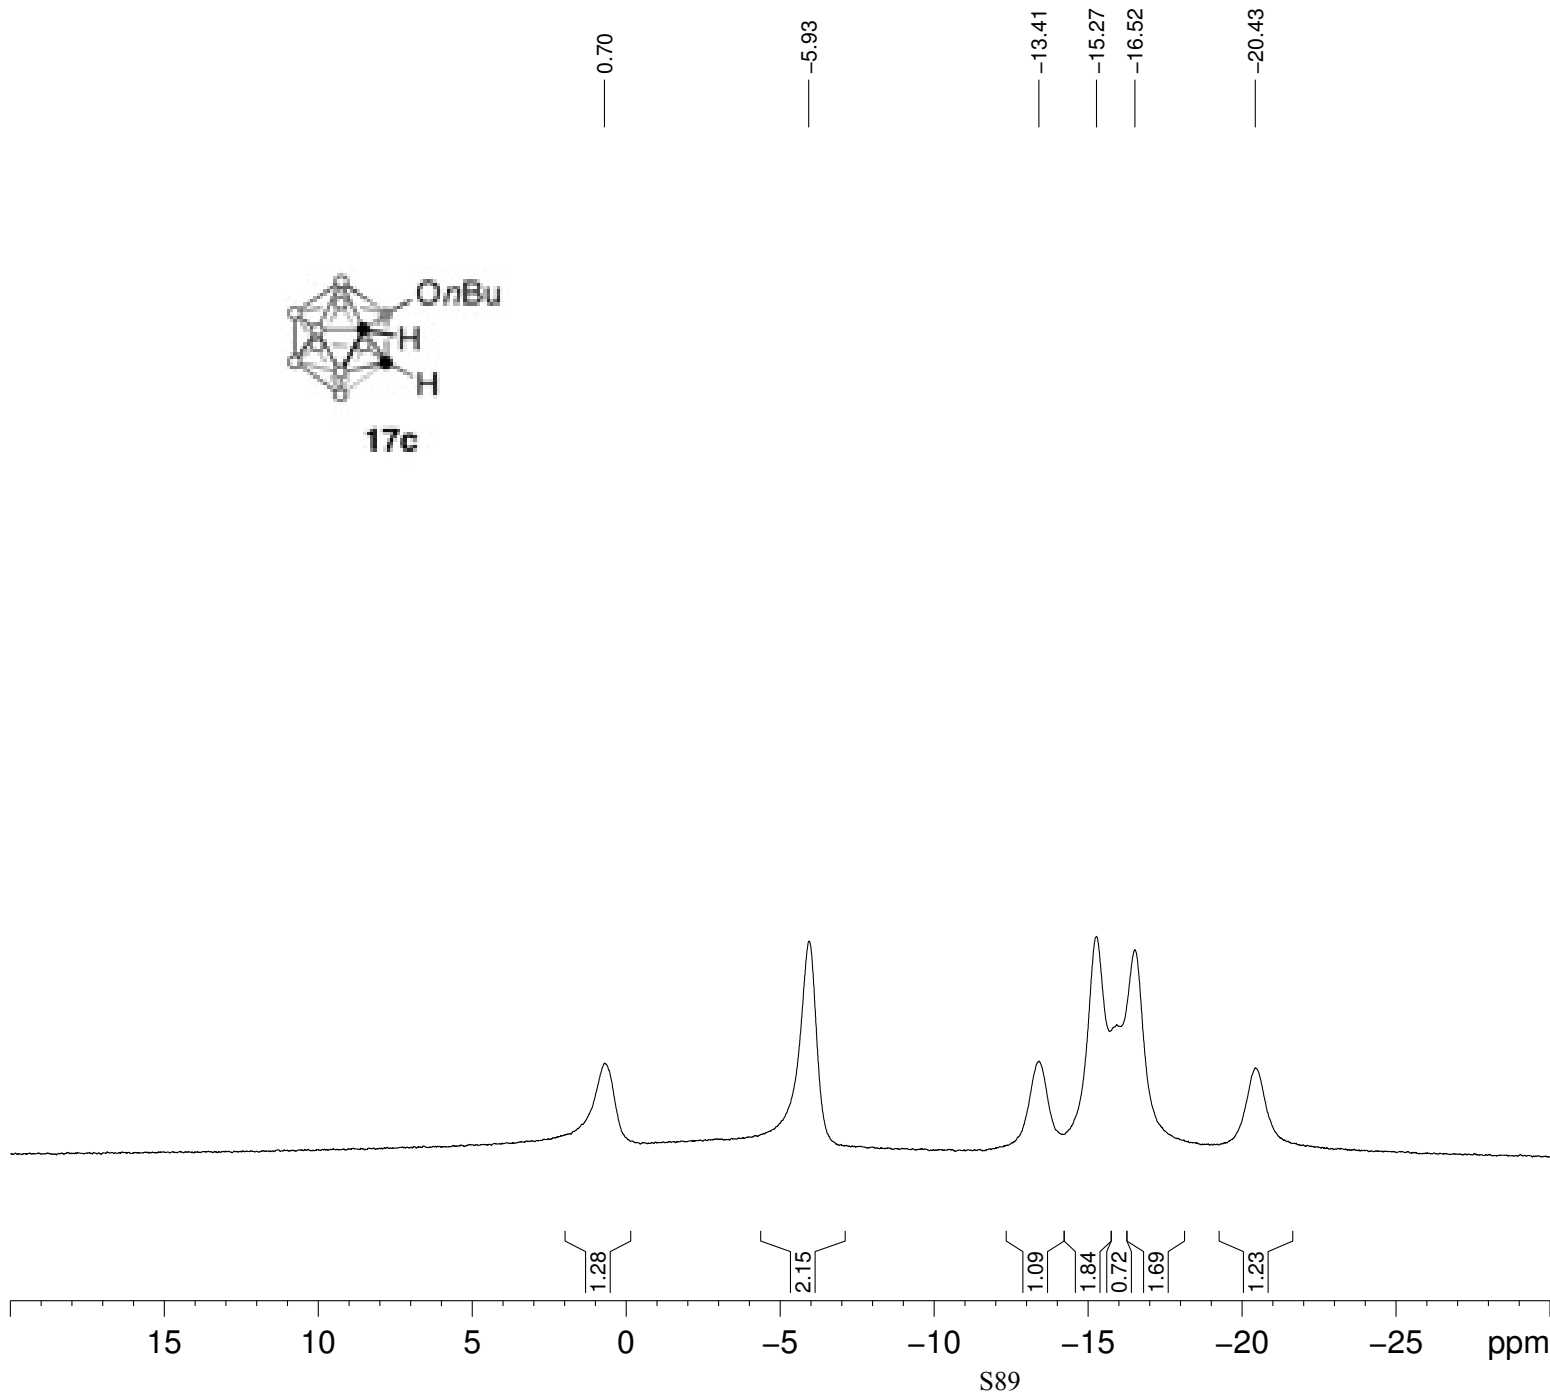

S89

ZD-746-CDC13-B (de)

```

NAME      ZD-746-CDC13-B (de)
EXPNO     1
PROCNO    1
Date_     20140823
Time      13.08
INSTRUM   spect
PROBHD    5 mm PABBO BB-
PULPROG   zgdc
TD         65536
SOLVENT   DMSO
NS         12
DS         0
SWH       25510.203 Hz
FIDRES    0.389255 Hz
AQ         1.2845556 sec
RG         322
DW         19.600 usec
DE         6.50 usec
TE         297.6 K
D1         5.0000000 sec
D11        0.0300000 sec
TD0        1
  
```

```

===== CHANNEL f1 =====
NUC1      11B
P1         7.60 usec
PL1        -3.00 dB
PL1W      55.13059616 W
SFO1      128.3968556 MHz
  
```

```

===== CHANNEL f2 =====
CPDPRG2   waltz16
NUC2       1H
PCPD2     90.00 usec
PL2        -1.00 dB
PL12       15.16 dB
PL2W      13.56617069 W
PL12W     0.32844096 W
SFO2      400.1916008 MHz
SI         32768
SF         128.3968847 MHz
WDW        EM
SSB         0
LB          3.00 Hz
GB          0
PC          1.40
  
```

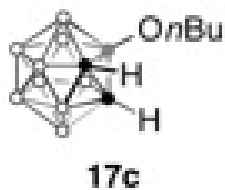

0.65  
 -5.39  
 -6.53  
 -12.85  
 -14.61  
 -15.90  
 -17.17  
 -19.91  
 -21.07

ZD-746-CDC13-B (c)

```

NAME      ZD-746-CDC13-B (c)
EXPNO     1
PROCNO    1
Date_     20140823
Time      13.09
INSTRUM   spect
PROBHD    5 mm PABBO BB-
PULPROG   zg30
TD         65536
SOLVENT   DMSO
NS         12
DS         0
SWH       25510.203 Hz
FIDRES    0.389255 Hz
AQ         1.2845556 sec
RG         161
DW         19.600 usec
DE         6.50 usec
TE         297.2 K
D1         5.00000000 sec
TD0        1
  
```

```

===== CHANNEL f1 =====
NUC1      11B
P1        7.60 usec
PL1       -3.00 dB
PL1W      55.13059616 W
SFO1      128.3968556 MHz
SI         32768
SF         128.3968865 MHz
WDW        EM
SSB        0
LB         3.00 Hz
GB         0
PC         1.40
  
```

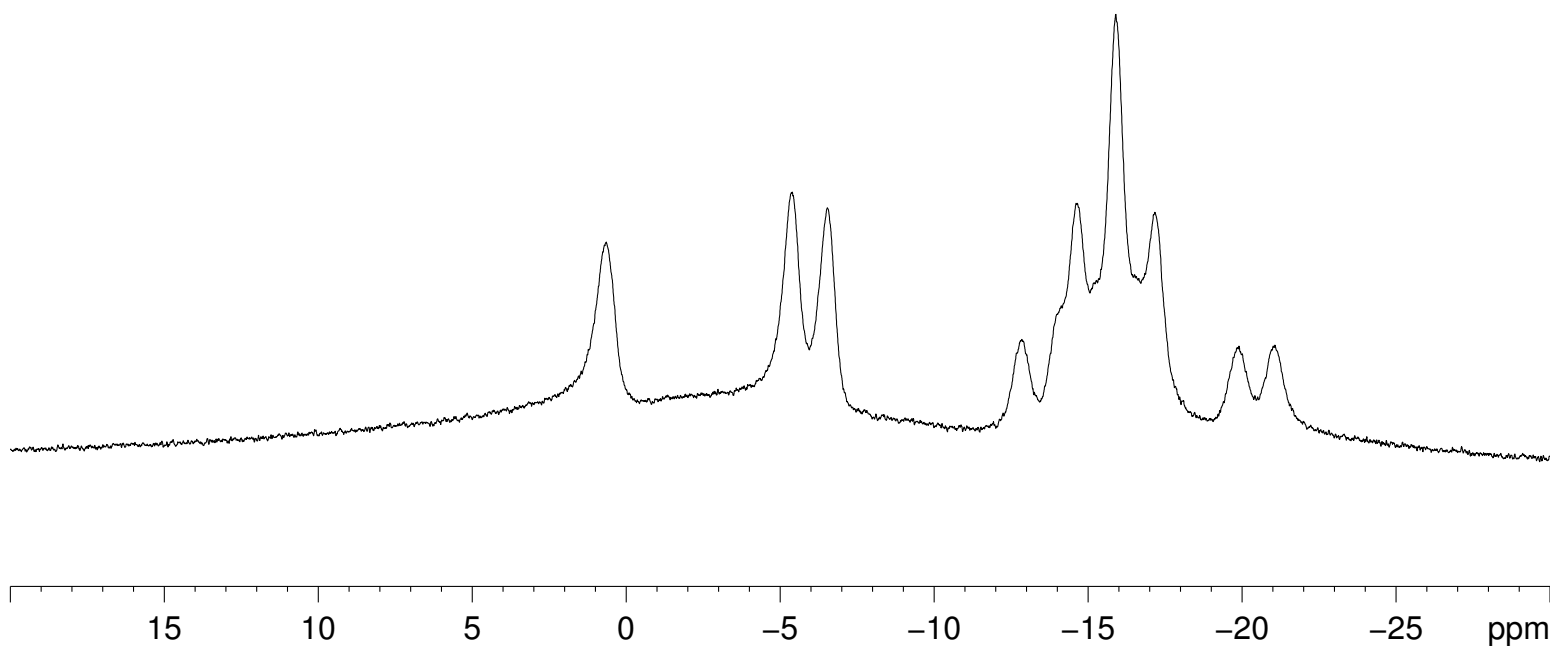

7.365  
7.344  
7.325  
7.260  
7.145  
7.128  
7.108

3.745

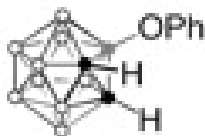

17e

ZD-7142-CDC13-H

NAME ZD-7142-CDC13-H  
EXPNO 1  
PROCNO 1  
Date\_ 20140802  
Time 20.30  
INSTRUM spect  
PROBHD 5 mm PABBO BB-  
PULPROG zg30  
TD 65536  
SOLVENT CDCl3  
NS 8  
DS 2  
SWH 8223.685 Hz  
FIDRES 0.125483 Hz  
AQ 3.9846387 sec  
RG 64  
DW 60.800 usec  
DE 6.50 usec  
TE 297.9 K  
D1 1.00000000 sec  
TD0 1

===== CHANNEL f1 =====  
NUC1 1H  
P1 14.00 usec  
PL1 -1.00 dB  
PL1W 13.56617069 W  
SFO1 400.1924713 MHz  
SI 32768  
SF 400.1900153 MHz  
WDW EM  
SSB 0  
LB 0.30 Hz  
GB 0  
PC 1.00

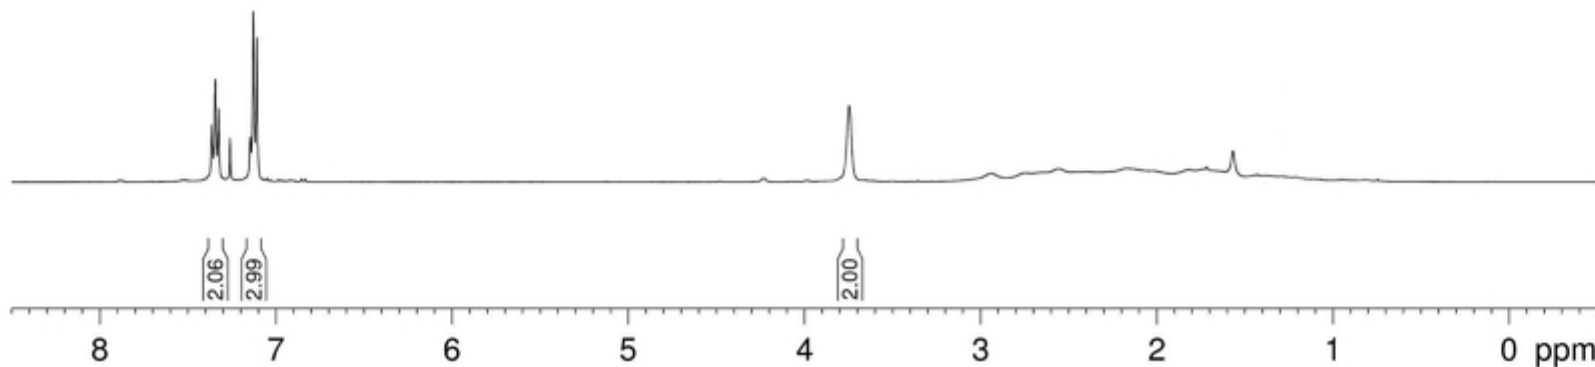

ZD-7142-CDC13-C

NAME ZD-7142-CDC13-C  
EXPNO 1  
PROCNO 1  
Date\_ 20140802  
Time 20.43  
INSTRUM spect  
PROBHD 5 mm PABBO BB-  
PULPROG zgpg30  
TD 65536  
SOLVENT CDC13  
NS 1028  
DS 4  
SWH 24038.461 Hz  
FIDRES 0.366798 Hz  
AQ 1.3631988 sec  
RG 203  
DW 20.800 usec  
DE 6.50 usec  
TE 298.4 K  
D1 2.00000000 sec  
D11 0.03000000 sec  
TD0 1

===== CHANNEL f1 =====  
NUC1 13C  
P1 9.90 usec  
PL1 -2.00 dB  
PL1W 55.33689499 W  
SFO1 100.6379183 MHz

===== CHANNEL f2 =====  
CPDPRG2 waltz16  
NUC2 1H  
PCPD2 90.00 usec  
PL2 -1.00 dB  
PL12 15.16 dB  
PL13 18.62 dB  
PL2W 13.56617069 W  
PL12W 0.32844096 W  
PL13W 0.14806664 W  
SFO2 400.1916008 MHz  
SI 32768  
SF 100.6278442 MHz  
WDW EM  
SSB 0  
LB 1.00 Hz  
GB 0  
PC 1.40

155.65  
130.00  
123.93  
119.75  
77.48  
77.16  
76.84  
56.22

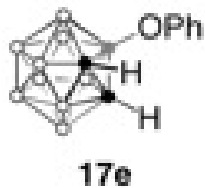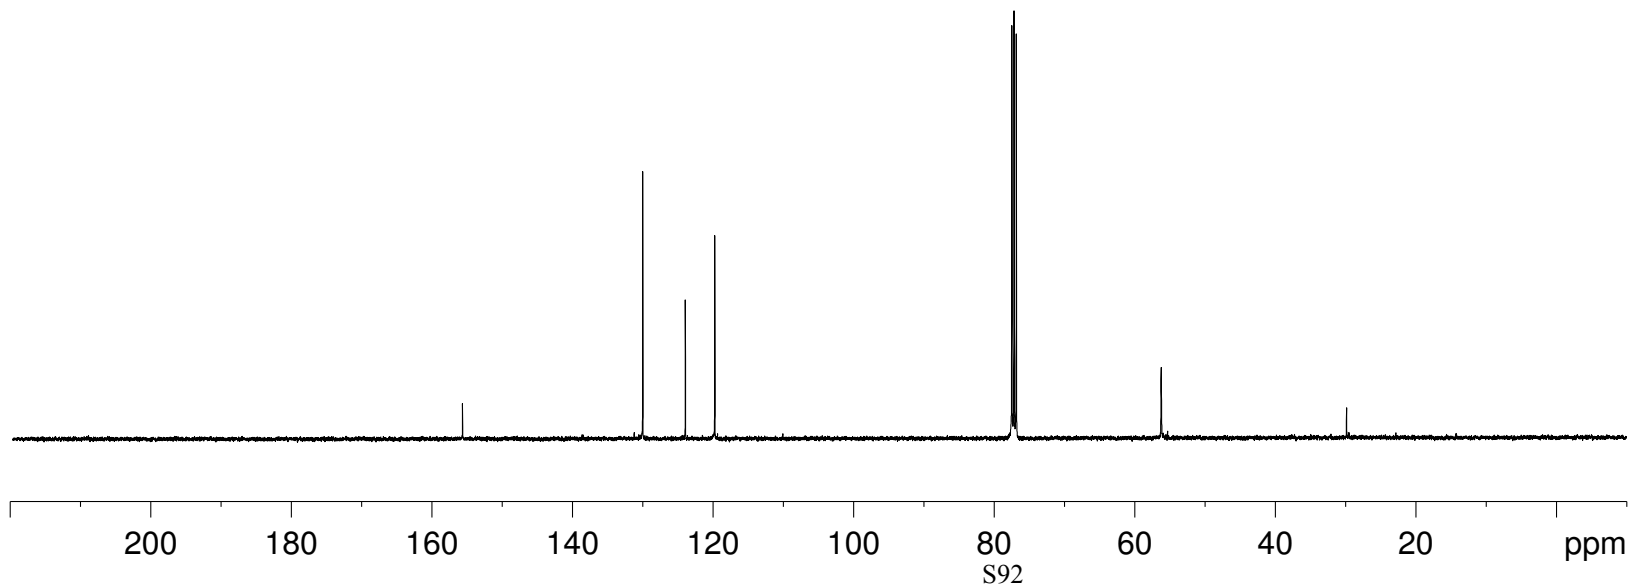

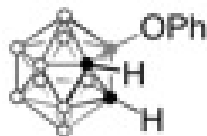

**17e**

— -0.64 — -4.91 — -12.06 — -14.48 — -15.23 — -15.75 — -18.91

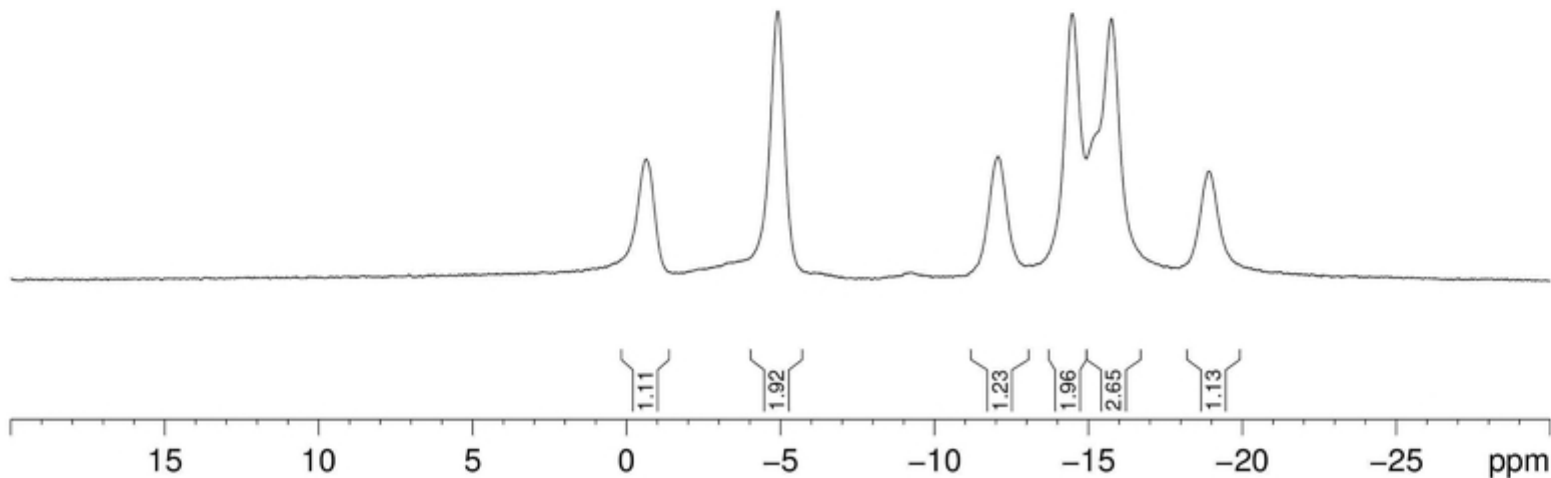

ZD-7142-CDC13-B (de)

```

NAME      ZD-7142-CDC13-B (de)
EXPNO     1
PROCNO    1
Date_     20140802
Time      21.45
INSTRUM   spect
PROBHD    5 mm PABBO BB-
PULPROG   zgdc
TD         65536
SOLVENT   CDC13
NS         3
DS         0
SWH       25510.203 Hz
FIDRES    0.389255 Hz
AQ        1.2845556 sec
RG         287
DW         19.600 usec
DE         6.50 usec
TE         298.5 K
D1         5.0000000 sec
D11        0.0300000 sec
TD0        1
  
```

```

----- CHANNEL f1 -----
NUC1      11B
P1         7.60 usec
PL1        -3.00 dB
PL1W      55.13059616 W
SFO1      128.3968556 MHz
  
```

```

----- CHANNEL f2 -----
CPDPRG2   waltz16
NUC2       1H
PCPD2     90.00 usec
PL2        -1.00 dB
PL12       15.16 dB
PL2W      13.56617069 W
PL12W     0.32844096 W
SFO2      400.1916008 MHz
SI         32768
SF         128.3968847 MHz
WDW        EM
SSB         0
LB          3.00 Hz
GB          0
PC          1.40
  
```

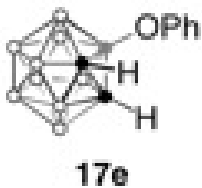

— -0.640  
 — -4.345  
 — -5.513  
  
 — -11.499  
 — -12.654  
 — -13.850  
 — -15.121  
 — -16.414  
 — -18.315  
 — -19.519

```

NAME      ZD-7142-CDC13-B(c)
EXPNO     1
PROCNO    1
Date_     20140802
Time      21.46
INSTRUM   spect
PROBHD    5 mm PABBO BB-
PULPROG   zg30
TD         65536
SOLVENT   CDCl3
NS         9
DS         0
SWH       25510.203 Hz
FIDRES    0.389255 Hz
AQ         1.2845556 sec
RG         161
DW         19.600 usec
DE         6.50 usec
TE         298.2 K
D1         5.00000000 sec
TD0        1
  
```

```

===== CHANNEL f1 =====
NUC1      11B
P1         7.60 usec
PL1        -3.00 dB
PL1W      55.13059616 W
SF01      128.3968556 MHz
SI         32768
SF         128.3968865 MHz
WDW        EM
SSB         0
LB          3.00 Hz
GB          0
PC          1.40
  
```

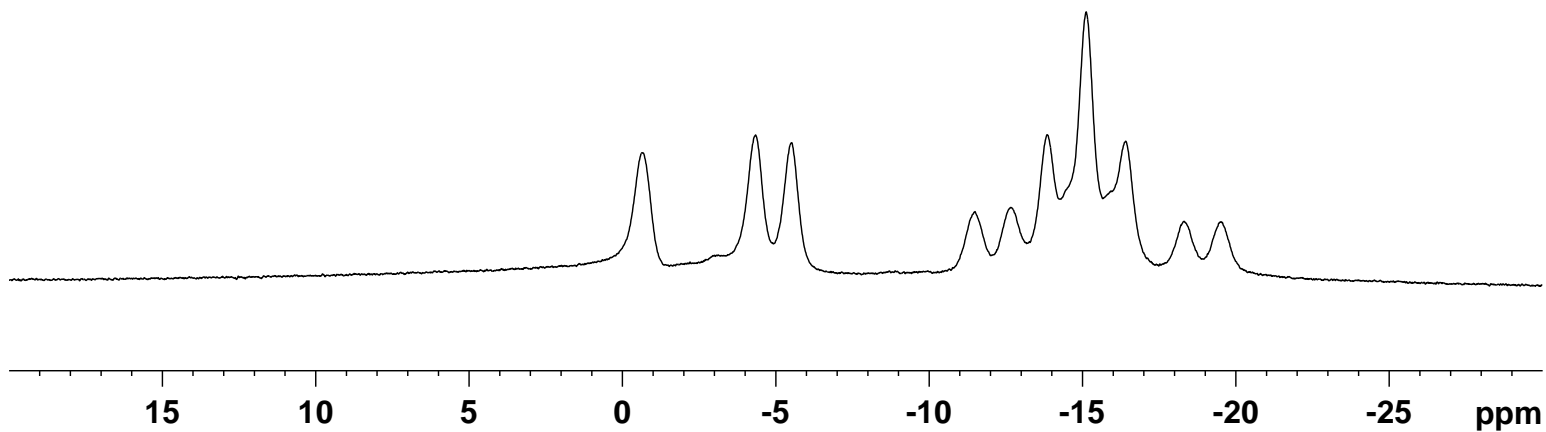

7.260  
6.984  
6.965  
6.949  
6.854  
6.844  
6.833

3.745

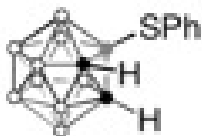

17f

ZD-740-CDCl3-H

NAME ZD-740-CDCl3-H  
EXPNO 1  
PROCNO 1  
Date\_ 20140819  
Time 20.30  
INSTRUM spect  
PROBHD 5 mm PABBO BB-  
PULPROG zg30  
TD 65536  
SOLVENT CDCl3  
NS 8  
DS 2  
SWH 8223.685 Hz  
FIDRES 0.125483 Hz  
AQ 3.9846387 sec  
RG 64  
DW 60.800 usec  
DE 6.50 usec  
TE 297.9 K  
D1 1.0000000 sec  
TD0 1

===== CHANNEL f1 =====  
NUC1 1H  
P1 14.00 usec  
PL1 -1.00 dB  
PL1W 13.56617069 W  
SFO1 400.1924713 MHz  
SI 32768  
SF 400.1900153 MHz  
WDW EM  
SSB 0  
LB 0.30 Hz  
GB 0  
PC 1.00

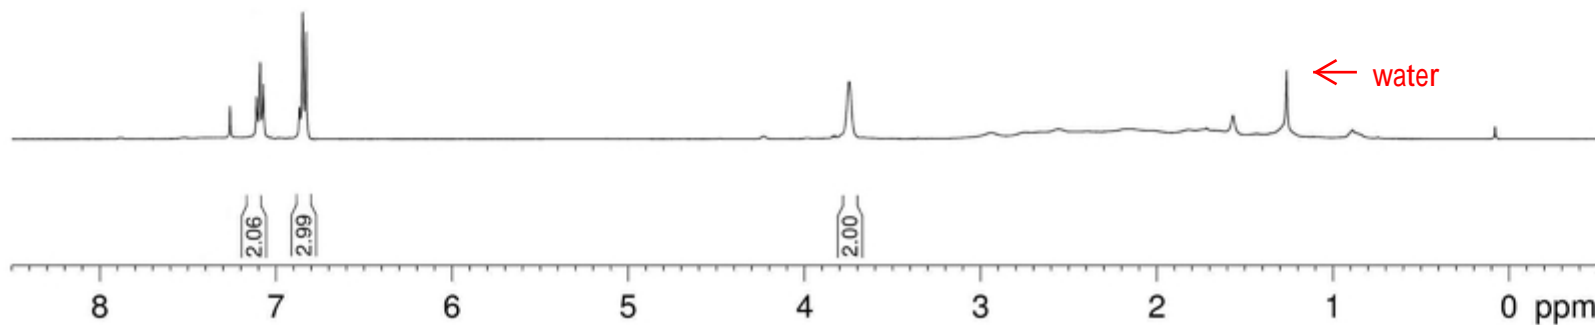

ZD-740-CDC13-C

NAME ZD-740-CDC13-C  
EXPNO 1  
PROCNO 1  
Date\_ 20140819  
Time 20.43  
INSTRUM spect  
PROBHD 5 mm PABBO BB-  
PULPROG zgpg30  
TD 65536  
SOLVENT CDC13  
NS 1079  
DS 4  
SWH 24038.461 Hz  
FIDRES 0.366798 Hz  
AQ 1.3631988 sec  
RG 203  
DW 20.800 usec  
DE 6.50 usec  
TE 298.4 K  
D1 2.00000000 sec  
D11 0.03000000 sec  
TDO 1

----- CHANNEL f1 -----  
NUC1 13C  
P1 9.90 usec  
PL1 -2.00 dB  
PL1W 55.33689499 W  
SFO1 100.6379183 MHz

----- CHANNEL f2 -----  
CPDPRG2 waltz16  
NUC2 1H  
PCPD2 90.00 usec  
PL2 -1.00 dB  
PL12 15.16 dB  
PL13 18.62 dB  
PL2W 13.56617069 W  
PL12W 0.32844096 W  
PL13W 0.14806664 W  
SFO2 400.1916008 MHz  
SI 32768  
SF 100.6278442 MHz  
WDW EM  
SSB 0  
LB 1.00 Hz  
GB 0  
PC 1.40

153.79

131.31

127.92

121.56

77.48

77.16

76.84

56.22

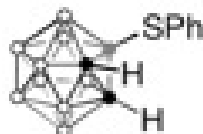

17f

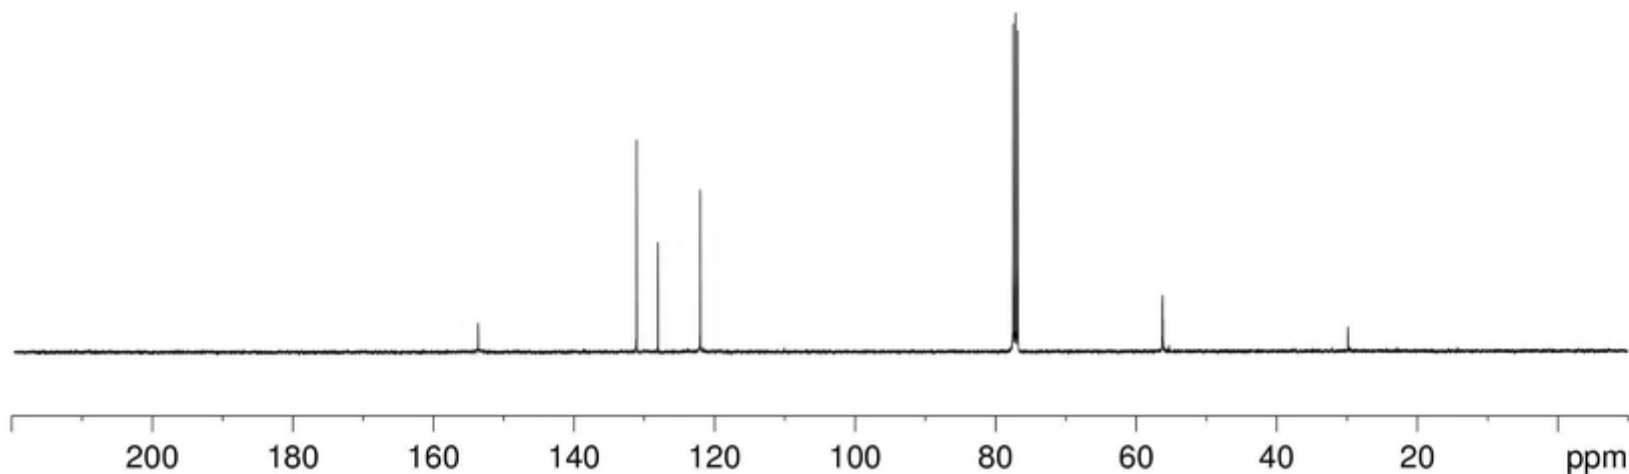



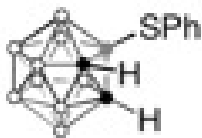

17f

— -2.927  
 — -9.518  
 — -11.198  
 — -12.149  
 — -13.073  
 — -14.149

```

NAME      ZD-3-SPh-CDCl3-B (de)
EXPNO     1
PROCNO    1
Date_     20151127
Time_     10.28 h
INSTRUM   spect
PROBHD    Z108618_0257 (
PULPROG   zgdc
TD        65536
SOLVENT   CDCl3
NS        8
DS        4
SWH       24038.461 Hz
FIDRES    0.366798 Hz
AQ        1.3631988 sec
RG        322
DW        20.800 usec
DE        6.50 usec
TE        298.4 K
D1        2.00000000 sec
D11       0.03000000 sec
TD0       1
SF01      128.4096890 MHz
NUC1      11B
P1        7.50 usec
SI        32768
SF        128.4096561 MHz
WDW       EM
SSB       0
LB        1.00 Hz
GB        0
PC        1.40
  
```

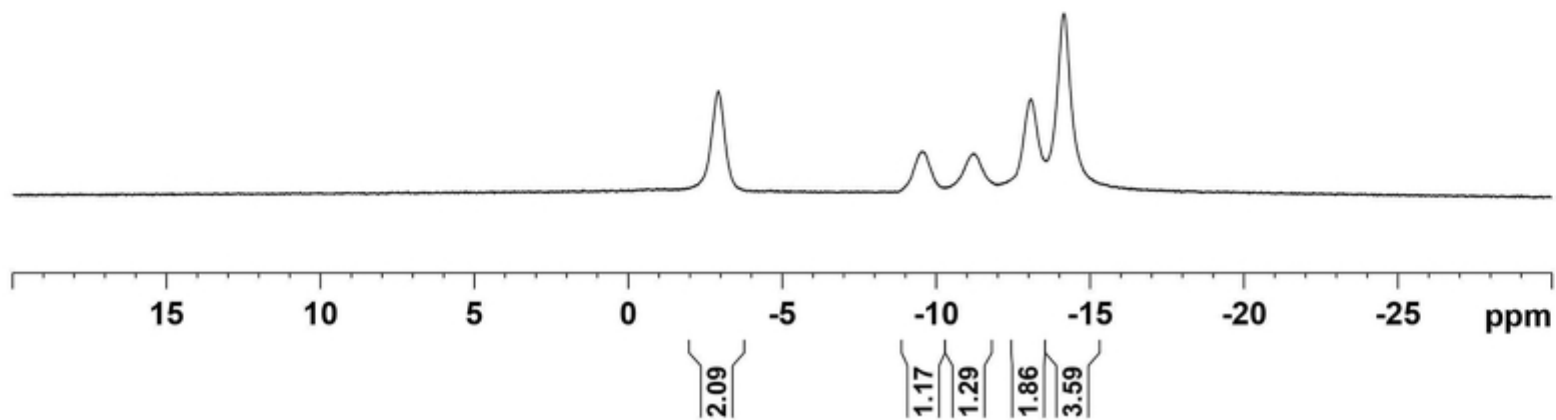



17f

— 2.355  
 — 3.526  
  
 — 8.934  
 — 10.194  
 — 11.249  
 — 12.440  
 — 13.609  
 — 14.816

```

NAME      ZD-3-SPh-CDC13-B(c)
EXPNO     1
PROCNO    1
Date_     20151127
Time_     10.29 h
INSTRUM   spect
PROBHD    Z108618_0257 (
PULPROG   zg
TD         65536
SOLVENT   CDC13
NS         24
DS         2
SWH        24038.461 Hz
FIDRES     0.366798 Hz
AQ         1.3631988 sec
RG         101
DW         20.800 usec
DE         6.50 usec
TE         298.3 K
D1         2.00000000 sec
TD0        1
SFO1       128.4096890 MHz
NUC1       11B
P1         7.50 usec
SI         32768
SF         128.4096580 MHz
WDW        EM
SSB        0
LB         1.00 Hz
GB         0
PC         1.40
  
```

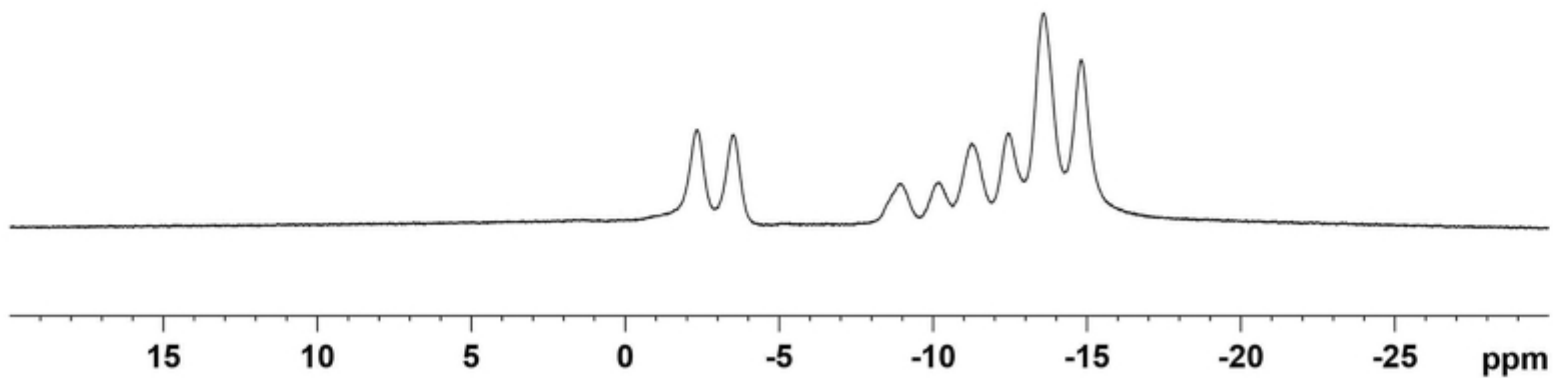

ZD-3-OH-CDC13-H

Current Data Parameters  
NAME ZD-3-OH-CDC13-H  
EXPNO 1  
PROCNO 1

F2 - Acquisition Parameters  
Date\_ 20160126  
Time 22.59 h  
INSTRUM spect  
PROBHD Z824601\_0021 (   
PULPROG zg  
TD 65536  
SOLVENT CDC13  
NS 16  
DS 0  
SWH 8012.820 Hz  
FIDRES 0.122266 Hz  
AQ 4.0894465 sec  
RG 181  
DW 62.400 usec  
DE 6.50 usec  
TE 294.0 K  
D1 1.00000000 sec  
TD0 1  
SFO1 400.1316005 MHz  
NUC1 1H  
P1 15.00 usec  
PLW1 8.31000042 W

F2 - Processing parameters  
SI 65536  
SF 400.1300098 MHz  
WDW EM  
SSB 0  
LB 0.30 Hz  
GB 0  
PC 1.00

7.260

4.426

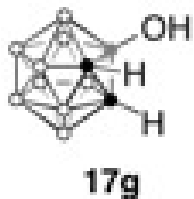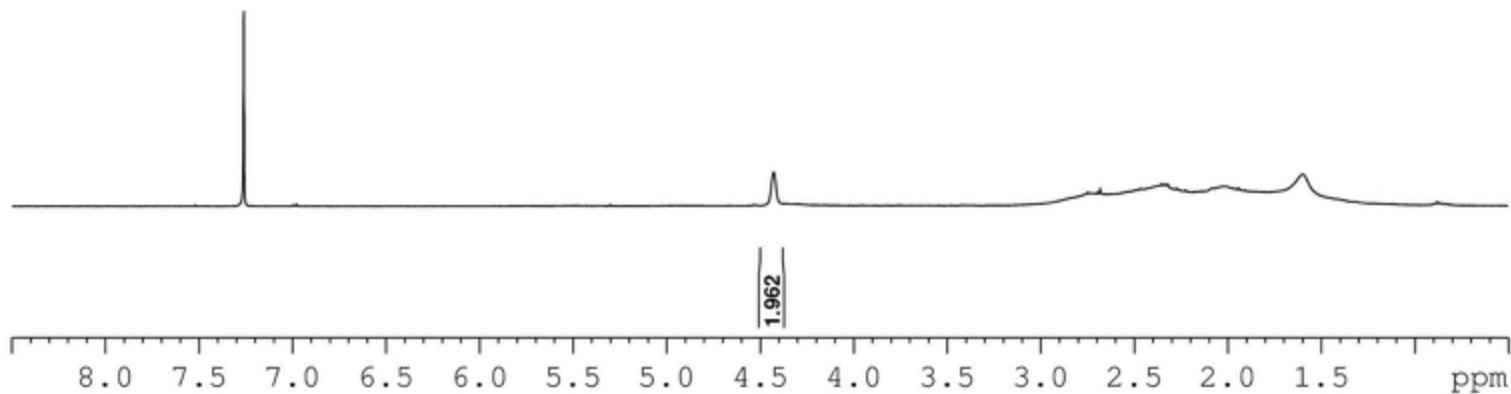

7.769  
7.739  
7.671  
7.651  
7.640  
7.633  
7.498  
7.484  
7.457  
7.447

5.322

4.700

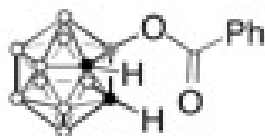

18

```

NAME      ZD-3-PhCOOH-CD2Cl2-H
EXPNO     1
PROCNO    1
Date_     20151115
Time_     13.01 h
INSTRUM   spect
PROBHD    Z824601_0021 (
PULPROG   zg30
TD        65536
SOLVENT   CD2Cl2
NS        4
DS        2
SWH       8012.820 Hz
FIDRES    0.122266 Hz
AQ        4.0894966 sec
RG        181
DW        62.400 usec
DE        6.50 usec
TE        295.3 K
D1        1.00000000 sec
TD0       1
SFO1      400.1324708 MHz
NUC1      1H
P1        15.00 usec
SI        65536
SF        400.1300148 MHz
WDW       EM
SSB       0
LB        0.30 Hz
GB        0
PC        1.00
  
```

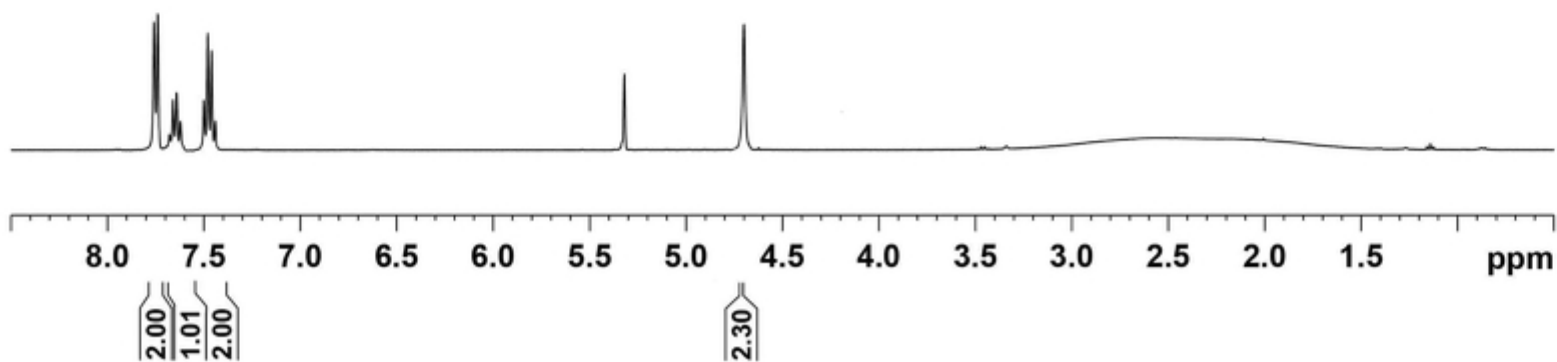

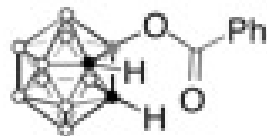

**18**

— 161.953

134.330  
132.114  
129.776  
127.218

57.846  
54.386  
54.114  
53.842  
53.575  
53.303

```

NAME      ZD-3-PhCOOH-CD2Cl2-C
EXPNO     1
PROCNO    1
Date_     2015115
Time      13.04 h
INSTRUM   spect
PROBHD    Z824601_0021 (
PULPROG   zgdc
TD        131072
SOLVENT   CD2Cl2
NS        48
DS        0
SWH       25252.525 Hz
FIDRES    0.192661 Hz
AQ        2.5952756 sec
RG        203
DW        19.800 usec
DE        6.50 usec
TE        295.4 K
D1        1.00000000 sec
D11       0.03000000 sec
TD0       1
SFO1      100.6227690 MHz
NUC1      13C
P1        9.50 usec
SI        131072
SF        100.6127290 MHz
WDW       EM
SSB       0
LB        3.00 Hz
GB        0
PC        1.40
  
```

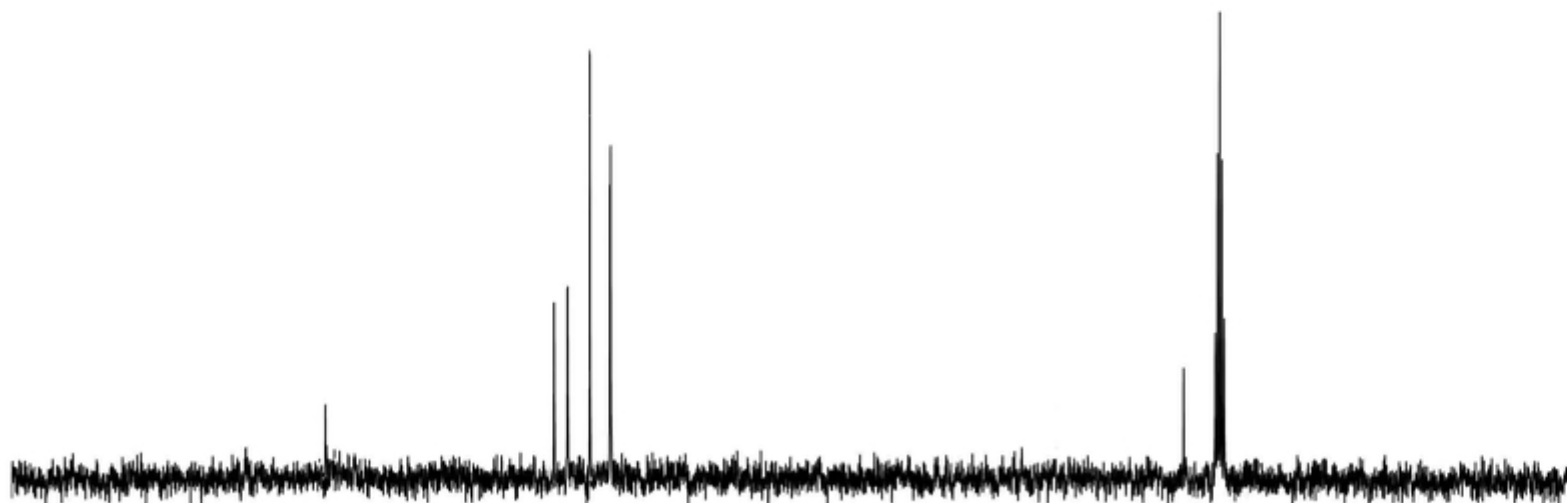

190 180 170 160 150 140 130 120 110 100 90 80 70 60 50 40 30 ppm

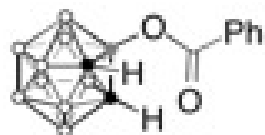

18

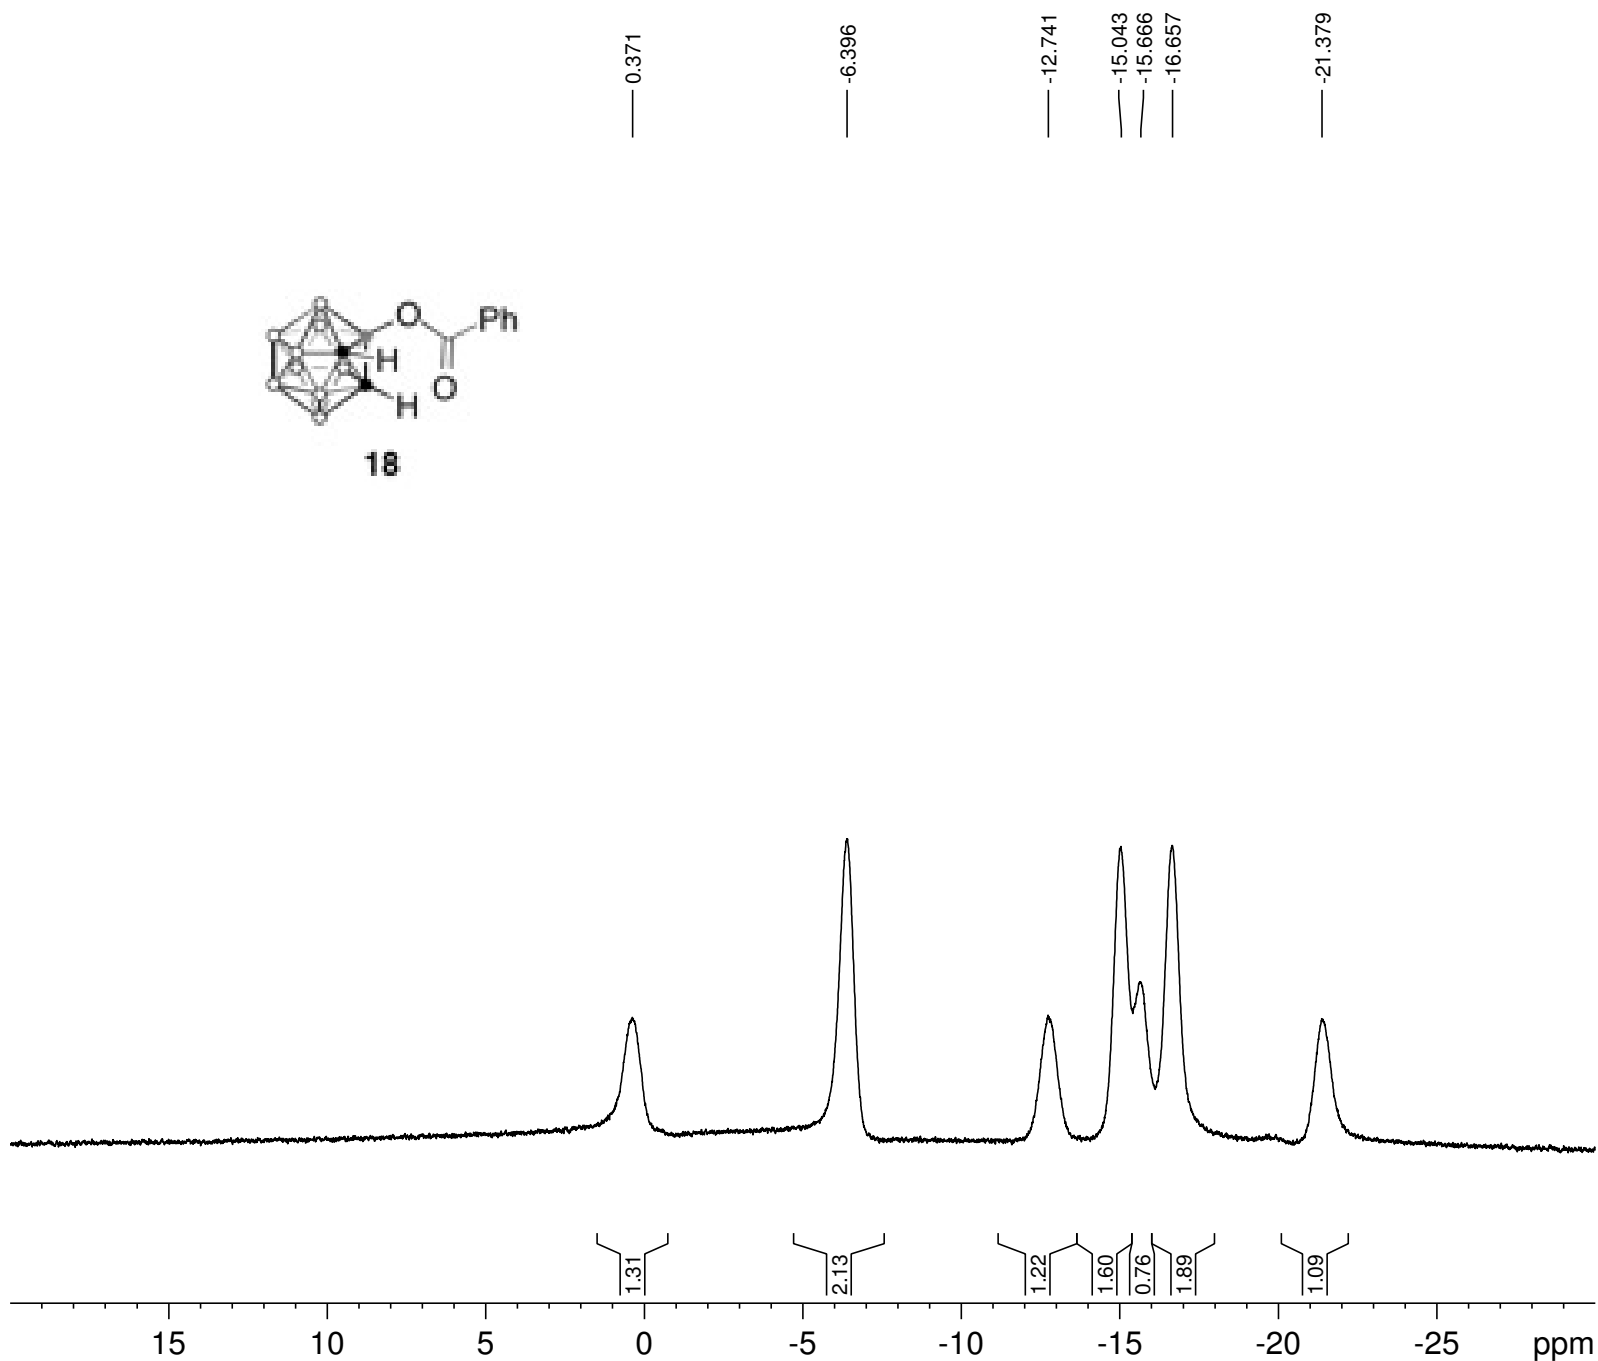

ZD-3-COOH-CD2Cl2-B (de)

Current Data Parameters  
 NAME ZD-3-DMSO-CD2Cl2-B(de)  
 EXPNO 1  
 PROCNO 1

F2 - Acquisition Parameters  
 Date\_ 20160131  
 Time\_ 20.49 h  
 INSTRUM spect  
 PROBHD Z108618\_0257 (  
 PULPROG zgdc  
 TD 65536  
 SOLVENT D2O  
 NS 8  
 DS 4  
 SWH 24038.461 Hz  
 FIDRES 0.366798 Hz  
 AQ 1.3631488 sec  
 RG 322  
 DW 20.800 usec  
 DE 6.50 usec  
 TE 298.4 K  
 D1 2.00000000 sec  
 D11 0.03000000 sec  
 TD0 1  
 SFO1 128.4096890 MHz  
 NUC1 11B  
 P1 7.50 usec  
 PLW1 55.09999847 W  
 SFO2 400.2316009 MHz  
 NUC2 1H  
 CPDPRG[2] waltz16  
 PCPD2 90.00 usec  
 PLW2 13.56000042 W  
 PLW12 0.27428001 W

F2 - Processing parameters  
 SI 32768  
 SF 128.4097724 MHz  
 WDW EM  
 SSB 0  
 LB 1.00 Hz  
 GB 0  
 PC 1.40

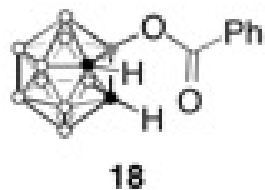

— 0.33  
 — -5.89 — -7.04  
 — -12.28 — -13.46 — -14.48 — -16.00 — -17.38  
 — -20.91 — -22.06

ZD-3-PhCOOH-CD2C12-B (c)

Current Data Parameters  
 NAME ZD-3-DMSO-CD2C12-B(c)  
 EXPNO 1  
 PROCNO 1

F2 - Acquisition Parameters  
 Date\_ 20160131  
 Time 20.51 h  
 INSTRUM spect  
 PROBHD Z108618\_0257 (  
 PULPROG zg  
 TD 65536  
 SOLVENT D2O  
 NS 24  
 DS 2  
 SWH 24038.461 Hz  
 FIDRES 0.366798 Hz  
 AQ 1.3631488 sec  
 RG 101  
 DW 20.800 usec  
 DE 6.50 usec  
 TE 298.2 K  
 D1 2.00000000 sec  
 TD0 1  
 SFO1 128.4096890 MHz  
 NUC1 11B  
 P1 7.50 usec  
 PLW1 55.09999847 W

F2 - Processing parameters  
 SI 32768  
 SF 128.4097843 MHz  
 WDW EM  
 SSB 0  
 LB 1.00 Hz  
 GB 0  
 PC 1.40

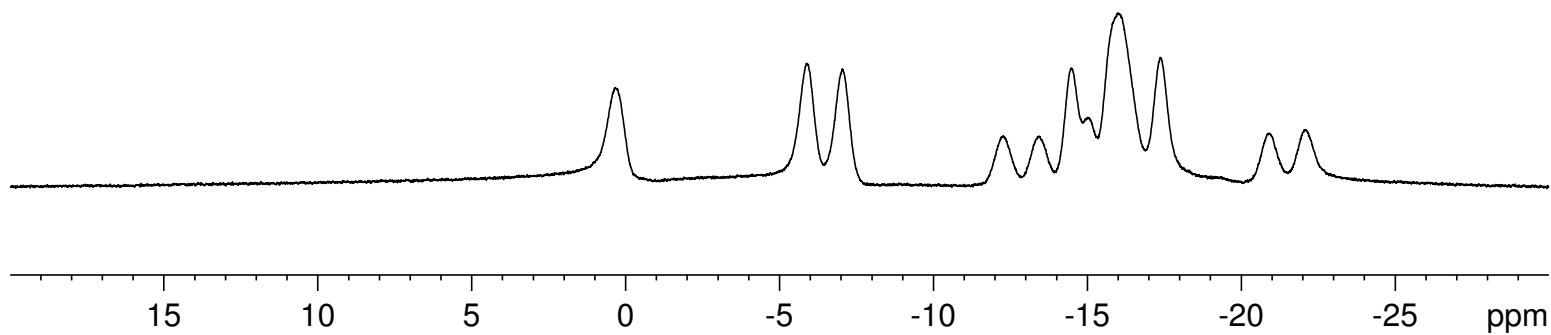

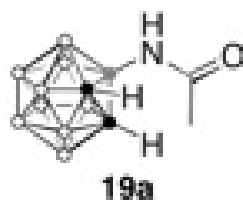

5.783  
 5.323  
 5.320  
 5.317  
 4.484  
 2.037

ZD-3-CH3CN-CD2Cl2-H

Current Data Parameters  
 NAME ZD-3-CH3CN-CD2Cl2-H  
 EXPNO 1  
 PROCNO 1

F2 - Acquisition Parameters  
 Date\_ 20160131  
 Time 20.52 h  
 INSTRUM spect  
 PROBHD Z108618\_0257 (  
 PULPROG zg30  
 TD 65536  
 SOLVENT CD2Cl2  
 NS 10  
 DS 2  
 SWH 8012.820 Hz  
 FIDRES 0.122266 Hz  
 AQ 4.0894465 sec  
 RG 144  
 DW 62.400 usec  
 DE 6.50 usec  
 TE 298.2 K  
 D1 1.00000000 sec  
 TD0 1  
 SFO1 400.2324714 MHz  
 NUC1 1H  
 P1 12.80 usec  
 PLW1 13.56000042 W

F2 - Processing parameters  
 SI 65536  
 SF 400.2300155 MHz  
 WDW EM  
 SSB 0  
 LB 0.30 Hz  
 GB 0  
 PC 1.00

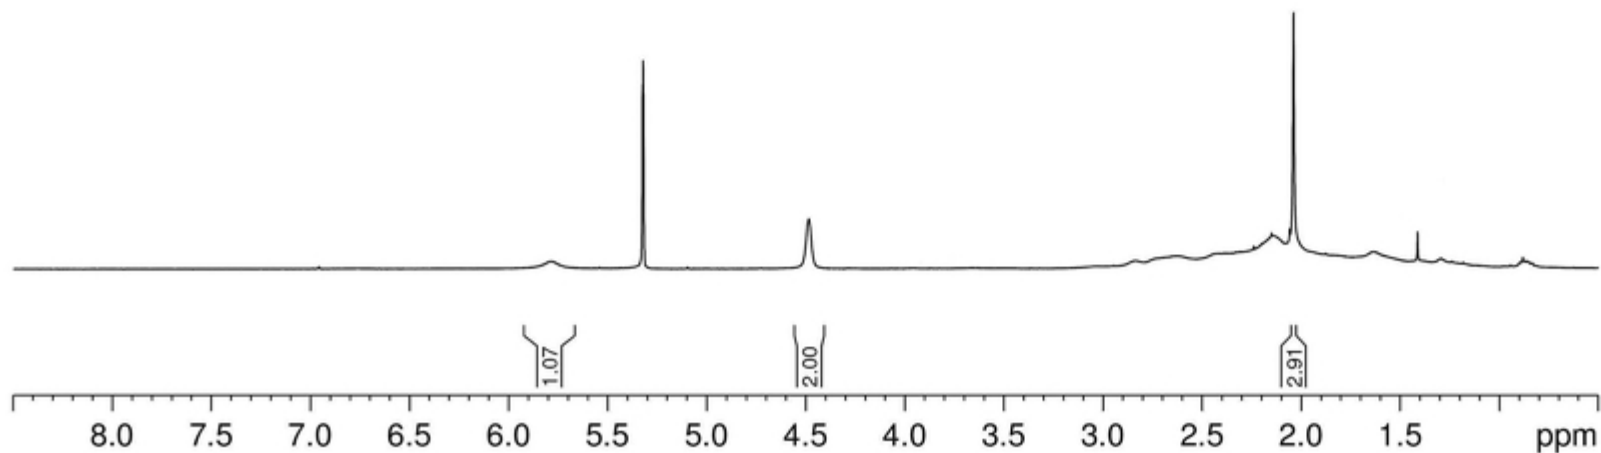



174.963

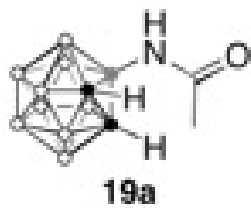

55.630  
54.379  
54.109  
53.839  
53.568  
53.298

25.125

ZD-3-CH3CN-CD2C12-C

Bruker Advance III 400

Current Data Parameters  
NAME ZD-3-CH3CN-CD2C12-C  
EXPNO 1  
PROCNO 1

F2 - Acquisition Parameters  
Date\_ 20160201  
Time 0.14 h  
INSTRUM spect  
PROBHD Z824601\_0021 (   
PULPROG zgdc  
TD 131072  
SOLVENT CD2C12  
NS 8118  
DS 0  
SWH 25252.525 Hz  
FIDRES 0.192661 Hz  
AQ 2.5952256 sec  
RG 203  
DW 19.800 usec  
DE 6.50 usec  
TE 295.7 K  
D1 1.00000000 sec  
D11 0.03000000 sec  
TD0 1  
SFO1 100.6227690 MHz  
NUC1 13C  
P1 9.50 usec  
PLW1 41.25000000 W  
SFO2 400.1320007 MHz  
NUC2 1H  
CPDPRG[2] waltz16  
PCPD2 90.00 usec  
PLW2 8.31000042 W  
PLW12 0.23083000 W

F2 - Processing parameters  
SI 131072  
SF 100.6127271 MHz  
WDW EM  
SSB 0  
LB 3.00 Hz  
GB 0  
PC 1.40

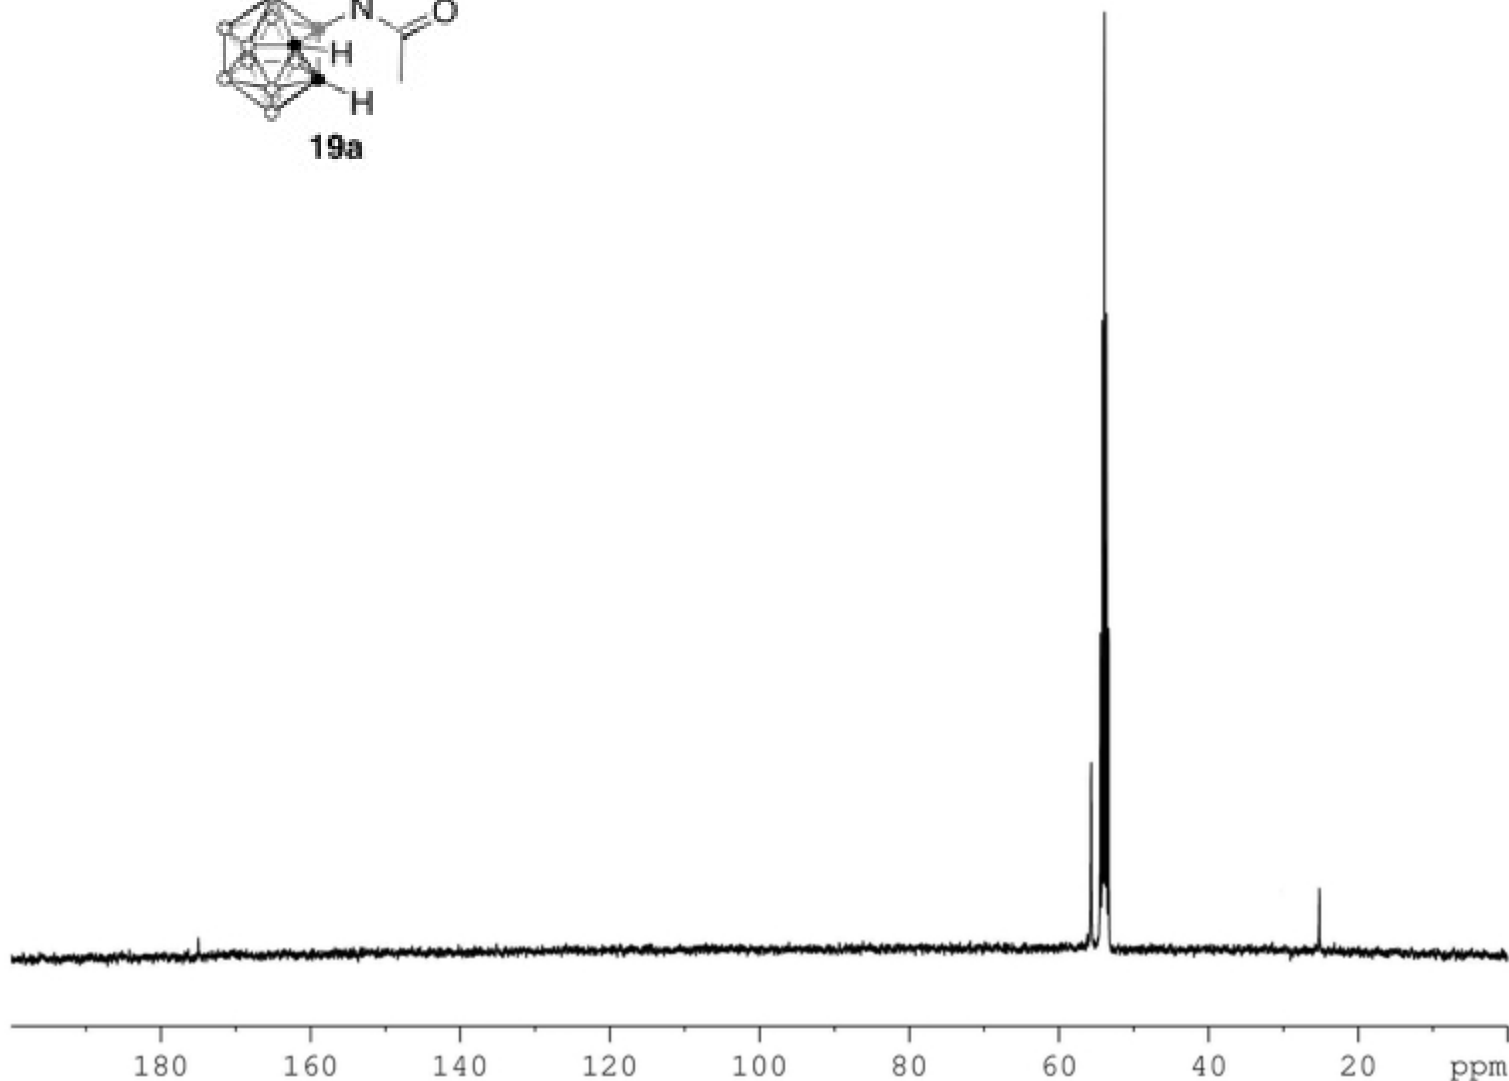

S105

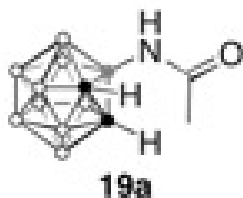

— -2.99  
 — -4.29  
 — -10.24  
 — -13.40  
 — -14.09

ZD-3-CH3CN-CDCl3-B (de)

Current Data Parameters  
 NAME ZD-3-N3-CDCl3-B(de)  
 EXPNO 1  
 PROCNO 1

F2 - Acquisition Parameters  
 Date\_ 20160131  
 Time 20.56 h  
 INSTRUM spect  
 PROBHD Z108618\_0257 (  
 PULPROG zgdc  
 TD 65536  
 SOLVENT CD2Cl2  
 NS 8  
 DS 4  
 SWH 24038.461 Hz  
 FIDRES 0.366798 Hz  
 AQ 1.3631488 sec  
 RG 203  
 DW 20.800 usec  
 DE 6.50 usec  
 TE 296.2 K  
 D1 2.0000000 sec  
 D11 0.0300000 sec  
 TD0 1  
 SFO1 128.4096890 MHz  
 NUC1 11B  
 P1 7.50 usec  
 PLW1 55.09999847 W  
 SFO2 400.2316009 MHz  
 NUC2 1H  
 CPDPRG[2] waltz16  
 PCPD2 90.00 usec  
 PLW2 13.56000042 W  
 PLW12 0.27428001 W

F2 - Processing parameters  
 SI 32768  
 SF 128.4096582 MHz  
 WDW EM  
 SSB 0  
 LB 1.00 Hz  
 GB 0  
 PC 1.40

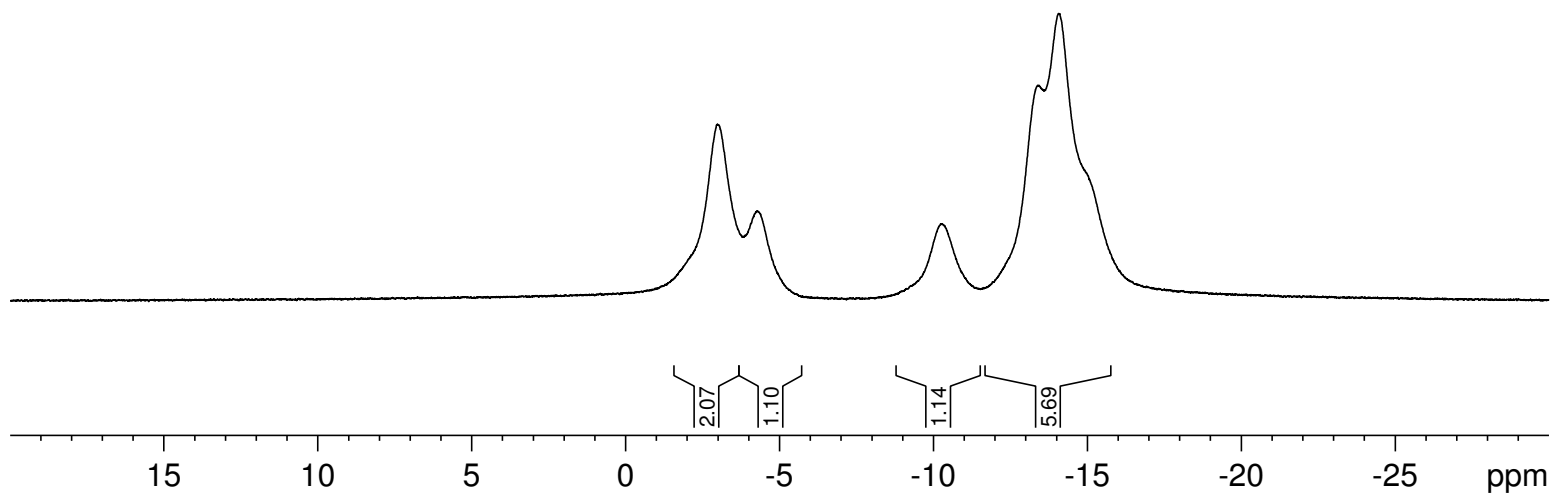



— -2.29  
 — -3.47  
 — -4.06  
  
 — -9.59  
 — -10.73  
  
 — -13.70  
 — -14.58

ZD-3-CH3CN-CD2C12-B (c)

Current Data Parameters  
 NAME ZD-3-N3-CDC13-B(c)  
 EXPNO 1  
 PROCNO 1

F2 - Acquisition Parameters  
 Date\_ 20160131  
 Time 20.58 h  
 INSTRUM spect  
 PROBHD Z108618\_0257 (  
 PULPROG zg  
 TD 65536  
 SOLVENT CD2C12  
 NS 43  
 DS 2  
 SWH 24038.461 Hz  
 FIDRES 0.366798 Hz  
 AQ 1.3631488 sec  
 RG 101  
 DW 20.800 usec  
 DE 6.50 usec  
 TE 295.8 K  
 D1 2.0000000 sec  
 TD0 1  
 SFO1 128.4096890 MHz  
 NUC1 11B  
 P1 7.50 usec  
 PLW1 55.09999847 W

F2 - Processing parameters  
 SI 32768  
 SF 128.4096452 MHz  
 WDW EM  
 SSB 0  
 LB 1.00 Hz  
 GB 0  
 PC 1.40

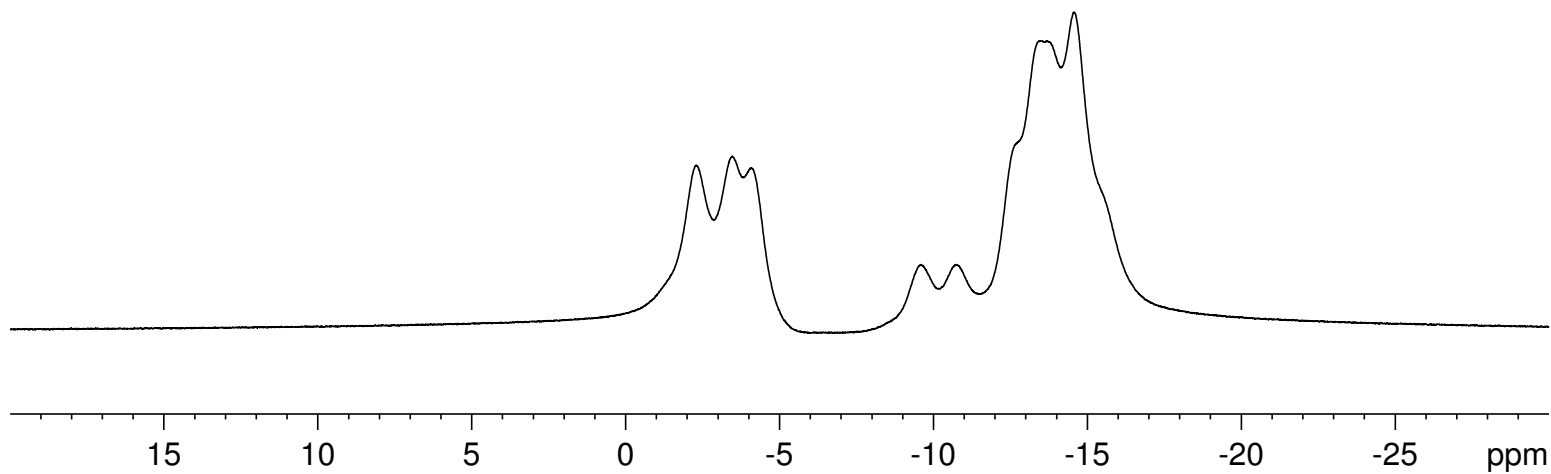

7.759  
7.740  
7.571  
7.551  
7.532  
7.514  
7.468  
7.448  
7.428  
7.409

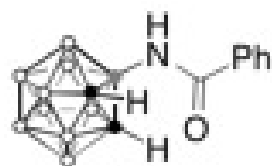

**19b**

ZD-3-PhCN-CD2C12-H

Current Data Parameters  
NAME ZD-3-PhCN-CD2C12-H  
EXPNO 1  
PROCNO 1

F2 - Acquisition Parameters  
Date\_ 20160128  
Time 17.01 h  
INSTRUM spect  
PROBHD Z824601\_0021 (   
PULPROG zg30  
TD 65536  
SOLVENT CD2C12  
NS 4  
DS 2  
SWH 8012.820 Hz  
FIDRES 0.122266 Hz  
AQ 4.0894465 sec  
RG 181  
DW 62.400 usec  
DE 6.50 usec  
TE 295.3 K  
D1 1.00000000 sec  
TD0 1  
SFO1 400.1324708 MHz  
NUC1 1H  
P1 15.00 usec  
PLW1 8.31000042 W

F2 - Processing parameters  
SI 65536  
SF 400.1300148 MHz  
WDW EM  
SSB 0  
LB 0.30 Hz  
GB 0  
PC 1.00

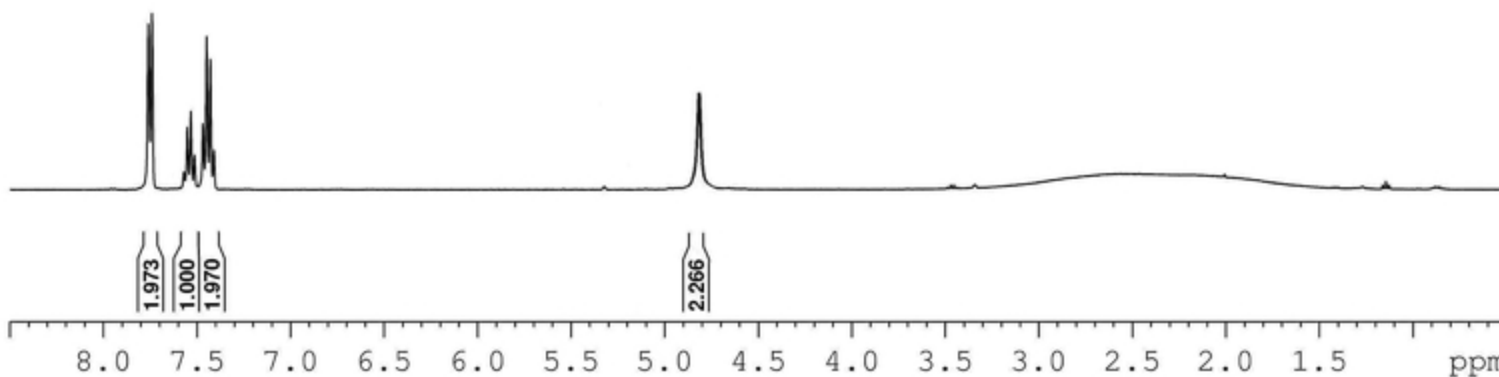

161.391

132.850  
132.711  
129.103  
127.610  
127.533

58.213  
54.381  
54.110  
53.839  
53.569  
53.298

ZD-3-PhCN-CD2Cl2-C



19b

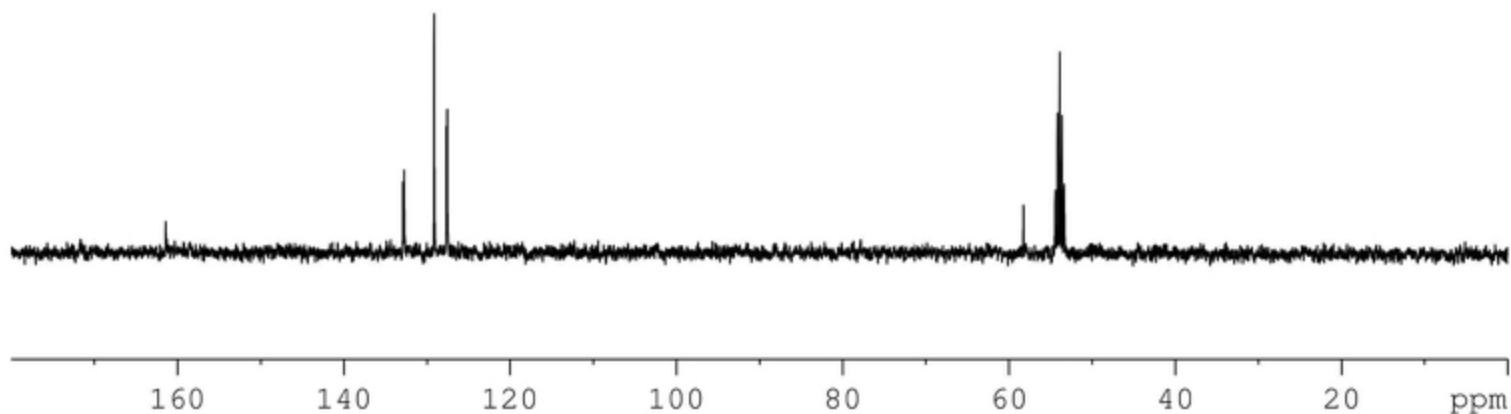

Current Data Parameters  
NAME ZD-3-PhCN-CD2Cl2-C  
EXPNO 1  
PROCNO 1

F2 - Acquisition Parameters  
Date\_ 20160128  
Time 17.04 h  
INSTRUM spect  
PROBHD Z824601\_0021 (   
PULPROG zgdc  
TD 131072  
SOLVENT CD2Cl2  
NS 48  
DS 0  
SWH 25252.525 Hz  
FIDRES 0.192661 Hz  
AQ 2.5952256 sec  
RG 203  
DW 19.800 usec  
DE 6.50 usec  
TE 295.4 K  
D1 1.00000000 sec  
D11 0.03000000 sec  
TD0 1  
SFO1 100.6227690 MHz  
NUC1 13C  
P1 9.50 usec  
PLW1 41.25000000 W  
SFO2 400.1320007 MHz  
NUC2 1H  
CPDPRG[2] waltz16  
PCPD2 90.00 usec  
PLW2 8.31000042 W  
PLW12 0.23083000 W

F2 - Processing parameters  
SI 131072  
SF 100.6127290 MHz  
WDW EM  
SSB 0  
LB 3.00 Hz  
GB 0  
PC 1.40

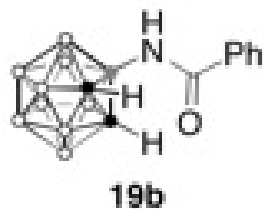

— -4.33  
 — -6.31  
 — -9.97  
 — -13.82

ZD-3-PhCN-CD<sub>2</sub>Cl<sub>2</sub>-B (de)

Current Data Parameters  
 NAME ZD-3-PhCN-CD<sub>2</sub>Cl<sub>2</sub>-B (de)  
 EXPNO 1  
 PROCNO 1

F2 - Acquisition Parameters  
 Date\_ 20160128  
 Time 17.38 h  
 INSTRUM spect  
 PROBHD z108618\_0257 (  
 PULPROG zgdc  
 TD 65536  
 SOLVENT D2O  
 NS 10  
 DS 4  
 SWH 24038.461 Hz  
 FIDRES 0.366798 Hz  
 AQ 1.3631488 sec  
 RG 256  
 DW 20.800 usec  
 DE 6.50 usec  
 TE 298.3 K  
 D1 2.00000000 sec  
 D11 0.03000000 sec  
 TD0 1  
 SFO1 128.4096890 MHz  
 NUC1 11B  
 P1 7.50 usec  
 PLW1 55.09999847 W  
 SFO2 400.2316009 MHz  
 NUC2 1H  
 CPDPRG[2] waltz16  
 PCPD2 90.00 usec  
 PLW2 13.56000042 W  
 PLW12 0.27428001 W

F2 - Processing parameters  
 SI 32768  
 SF 128.4097615 MHz  
 WDW EM  
 SSB 0  
 LB 1.00 Hz  
 GB 0  
 PC 1.40

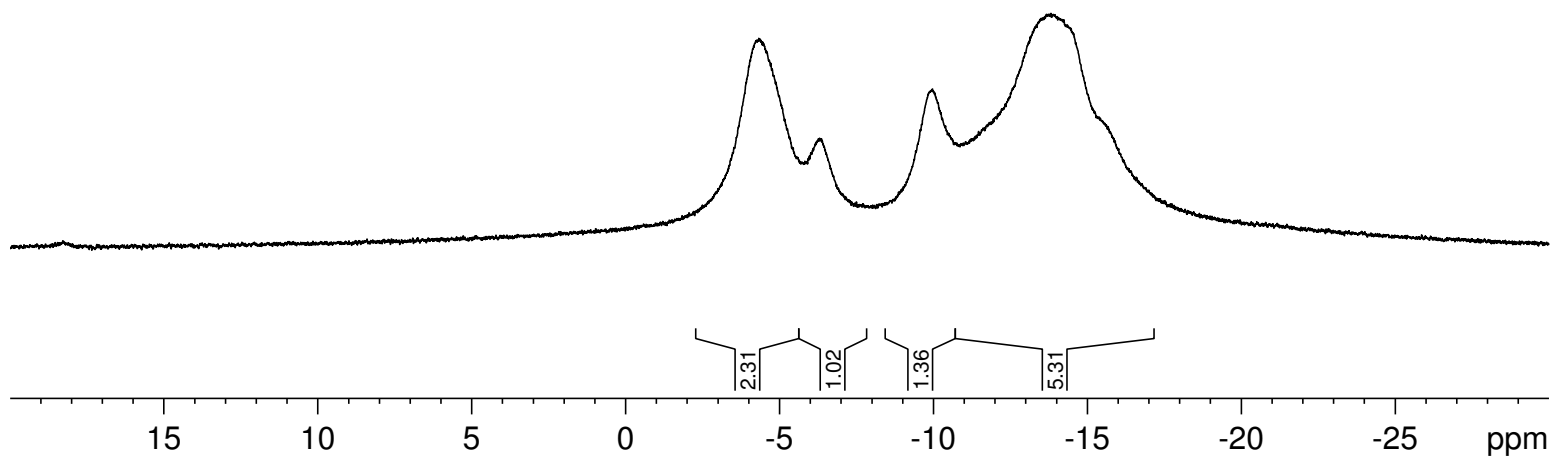

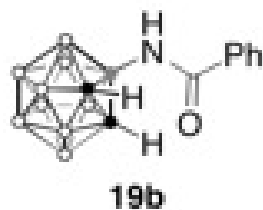

— -4.60  
 — -6.60  
 — -9.07  
 — -10.27  
 — -13.62

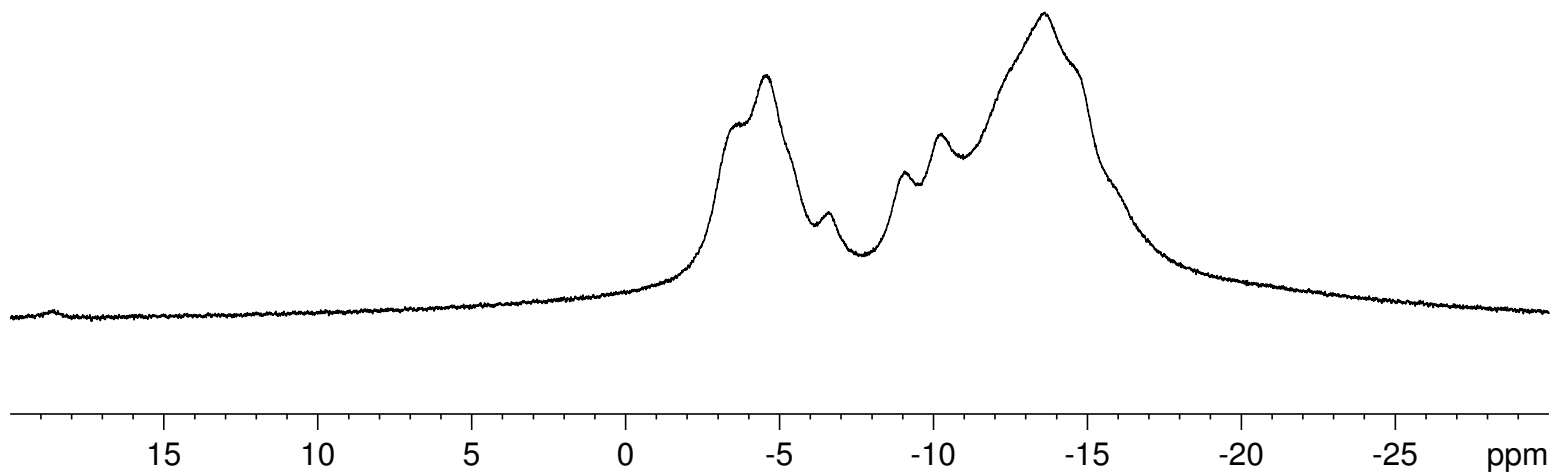

ZD-3-PhCN-CD<sub>2</sub>Cl<sub>2</sub>-B (c)

Current Data Parameters  
 NAME ZD-3-PhCN-CD<sub>2</sub>Cl<sub>2</sub>-B(c)  
 EXPNO 1  
 PROCNO 1

F2 - Acquisition Parameters  
 Date\_ 20160128  
 Time 17.39 h  
 INSTRUM spect  
 PROBHD Z108618\_0257 (  
 PULPROG zg  
 TD 65536  
 SOLVENT D2O  
 NS 19  
 DS 2  
 SWH 24038.461 Hz  
 FIDRES 0.366798 Hz  
 AQ 1.3631488 sec  
 RG 101  
 DW 20.800 usec  
 DE 6.50 usec  
 TE 298.3 K  
 D1 2.00000000 sec  
 TD0 1  
 SFO1 128.4096890 MHz  
 NUC1 11B  
 P1 7.50 usec  
 PLW1 55.09999847 W

F2 - Processing parameters  
 SI 32768  
 SF 128.4097221 MHz  
 WDW EM  
 SSB 0  
 LB 1.00 Hz  
 GB 0  
 PC 1.40

ZD-3-DMSO-CD2C12-H

Current Data Parameters  
NAME ZD-3-DMSO-CD2C12-H  
EXPNO 1  
PROCNO 1

F2 - Acquisition Parameters  
Date\_ 20160128  
Time 16.21 h  
INSTRUM spect  
PROBHD Z824601\_0021 (   
PULPROG zg30  
TD 65536  
SOLVENT CD2C12  
NS 8  
DS 2  
SWH 8012.820 Hz  
FIDRES 0.122266 Hz  
AQ 4.0894465 sec  
RG 203  
DW 62.400 usec  
DE 6.50 usec  
TE 295.1 K  
D1 1.00000000 sec  
TD0 1  
SFO1 400.1324708 MHz  
NUC1 1H  
P1 15.00 usec  
PLW1 8.31000042 W

F2 - Processing parameters  
SI 65536  
SF 400.1300151 MHz  
WDW EM  
SSB 0  
LB 0.30 Hz  
GB 0  
PC 1.00

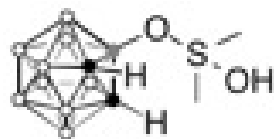

20

5.425  
5.320

3.701

2.607

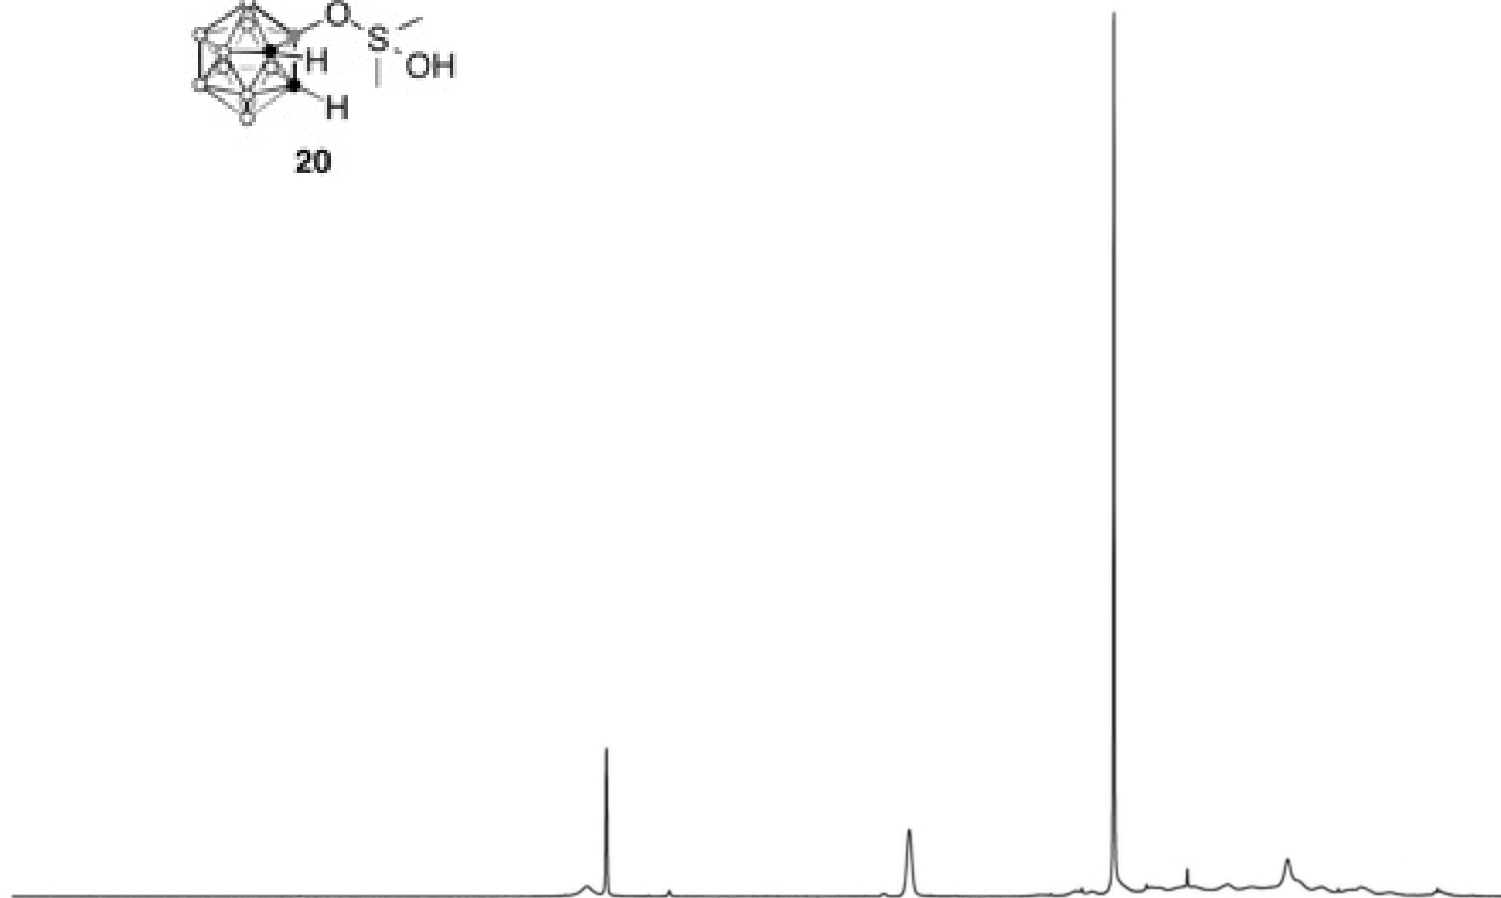

0.673

2.000

5.929

8.0 7.5 7.0 6.5 6.0 5.5 5.0 4.5 4.0 3.5 3.0 2.5 2.0 1.5 ppm





20

57.160  
54.382  
54.110  
53.840  
53.569  
53.299  
41.024

ZD-3-DMSO-CD2C12-C

Current Data Parameters  
NAME ZD-3-DMSO-CD2C12-C  
EXPNO 1  
PROCNO 1

F2 - Acquisition Parameters  
Date\_ 20160128  
Time 16.27 h  
INSTRUM spect  
PROBHD Z824601\_0021 (   
PULPROG zgdc  
TD 131072  
SOLVENT CD2C12  
NS 128  
DS 0  
SWH 25252.525 Hz  
FIDRES 0.192661 Hz  
AQ 2.5952256 sec  
RG 203  
DW 19.800 usec  
DE 6.50 usec  
TE 295.3 K  
D1 1.00000000 sec  
D11 0.03000000 sec  
TD0 1  
SFO1 100.6227690 MHz  
NUC1 13C  
P1 9.50 usec  
PLW1 41.25000000 W  
SFO2 400.1320007 MHz  
NUC2 1H  
CPDPRG[2] waltz16  
PCPD2 90.00 usec  
PLW2 8.31000042 W  
PLW12 0.23083000 W

F2 - Processing parameters  
SI 131072  
SF 100.6127282 MHz  
WDW EM  
SSB 0  
LB 3.00 Hz  
GB 0  
PC 1.40

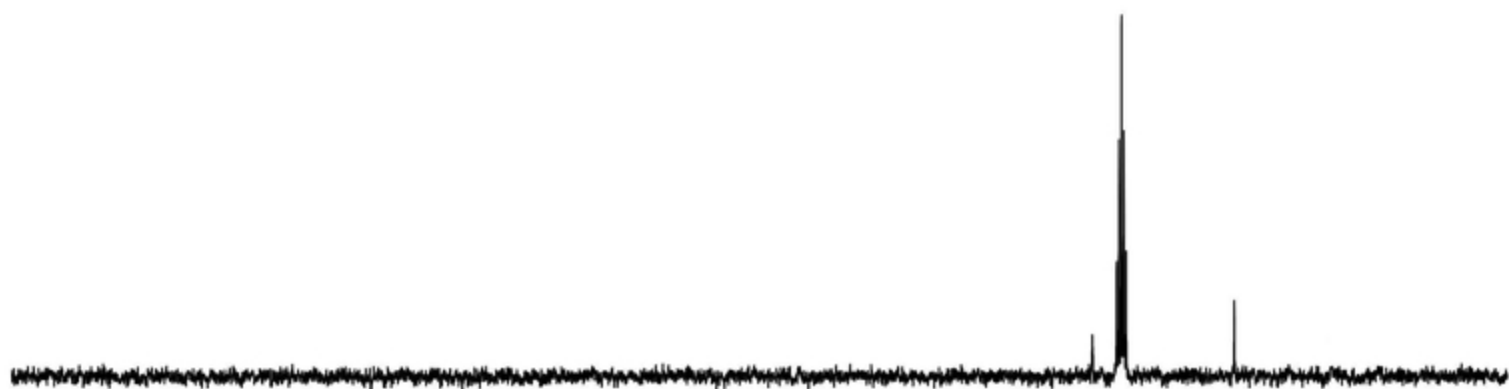

170 160 150 140 130 120 110 100 90 80 70 60 50 40 30 ppm

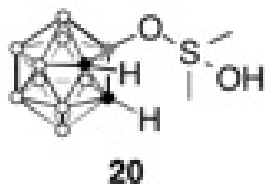

— 0.46  
 — 6.31  
 — 12.66  
 — 14.96  
 — 15.58  
 — 16.57  
 — 21.29

ZD-3-DMSO-CD2Cl2-B (de)

Current Data Parameters  
 NAME ZD-3-DMSO-CD2Cl2-B (de)  
 EXPNO 1  
 PROCNO 1

F2 - Acquisition Parameters  
 Date\_ 20160128  
 Time 17.34 h  
 INSTRUM spect  
 PROBHD z108618\_0257 (  
 PULPROG zgdc  
 TD 65536  
 SOLVENT D2O  
 NS 8  
 DS 4  
 SWH 24038.461 Hz  
 FIDRES 0.366798 Hz  
 AQ 1.3631488 sec  
 RG 322  
 DW 20.800 usec  
 DE 6.50 usec  
 TE 298.4 K  
 D1 2.00000000 sec  
 D11 0.03000000 sec  
 TD0 1  
 SFO1 128.4096890 MHz  
 NUC1 11B  
 P1 7.50 usec  
 PLW1 55.09999847 W  
 SFO2 400.2316009 MHz  
 NUC2 1H  
 CPDPRG[2] waltz16  
 PCPD2 90.00 usec  
 PLW2 13.56000042 W  
 PLW12 0.27428001 W

F2 - Processing parameters  
 SI 32768  
 SF 128.4097615 MHz  
 WDW EM  
 SSB 0  
 LB 1.00 Hz  
 GB 0  
 PC 1.40

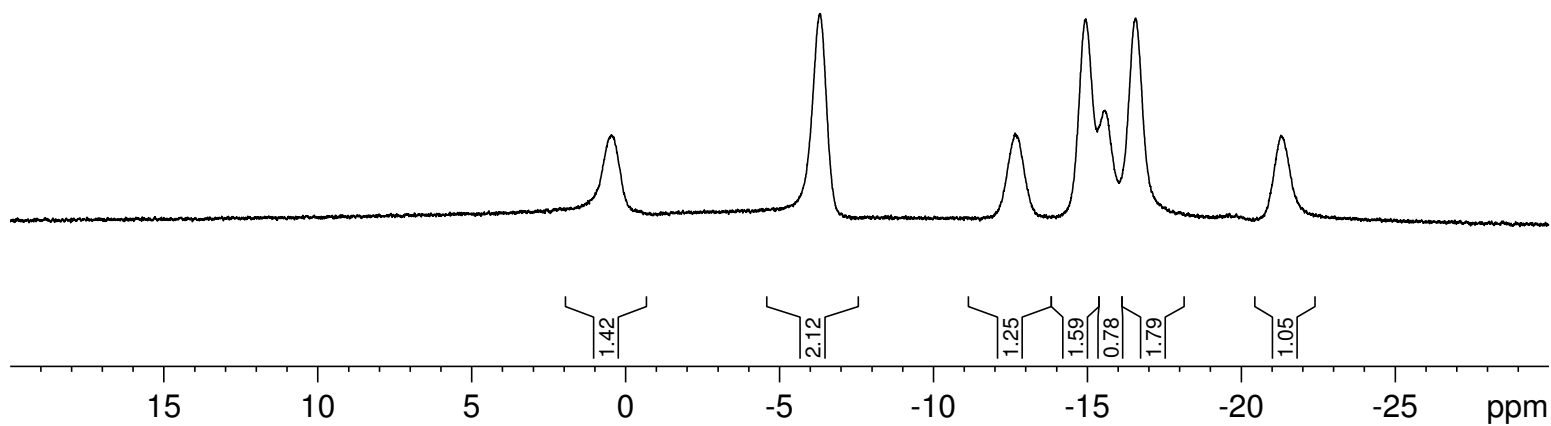

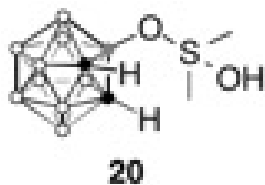

— 0.46  
 — -5.76  
 — -6.92  
 — -12.16  
 — -13.33  
 — -14.36  
 — -15.87  
 — -17.25  
 — -20.78  
 — -21.93

ZD-3-DMSO-CD2Cl2-B (c)

Current Data Parameters  
 NAME ZD-3-DMSO-CD2Cl2-B(c)  
 EXPNO 1  
 PROCNO 1

F2 - Acquisition Parameters  
 Date\_ 20160128  
 Time 17.36 h  
 INSTRUM spect  
 PROBHD Z108618\_0257 (  
 PULPROG zg  
 TD 65536  
 SOLVENT D2O  
 NS 24  
 DS 2  
 SWH 24038.461 Hz  
 FIDRES 0.366798 Hz  
 AQ 1.3631488 sec  
 RG 101  
 DW 20.800 usec  
 DE 6.50 usec  
 TE 298.2 K  
 D1 2.00000000 sec  
 TD0 1  
 SFO1 128.4096890 MHz  
 NUC1 11B  
 P1 7.50 usec  
 PLW1 55.09999847 W

F2 - Processing parameters  
 SI 32768  
 SF 128.4097682 MHz  
 WDW EM  
 SSB 0  
 LB 1.00 Hz  
 GB 0  
 PC 1.40

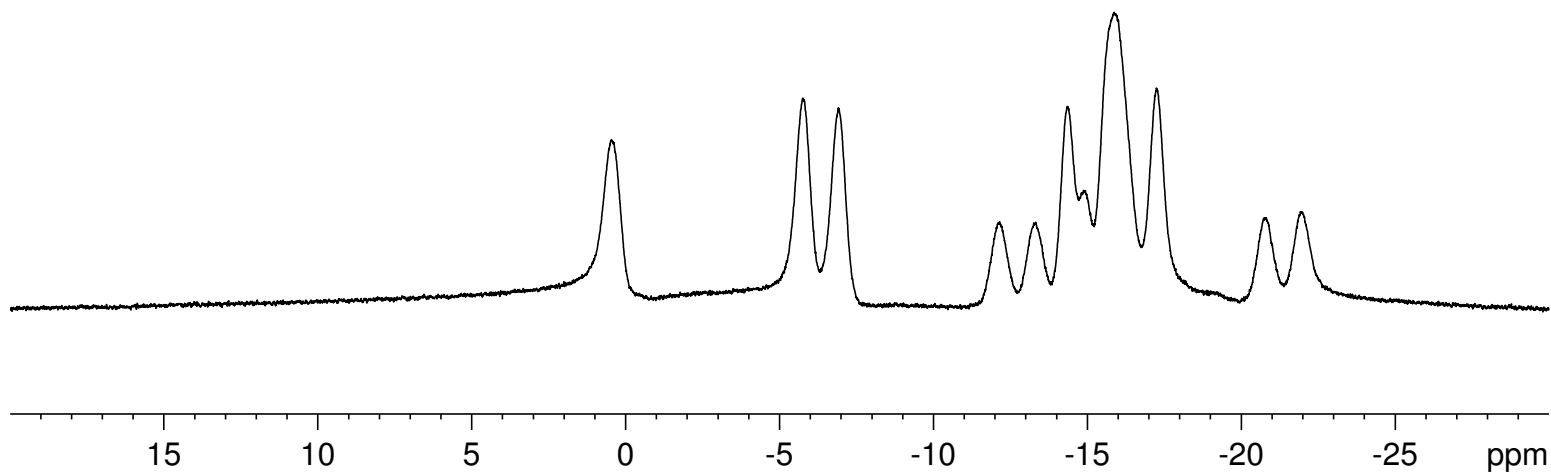

7.899  
7.881  
7.867  
7.849  
7.650  
7.633  
7.616  
7.580  
7.571  
7.561  
7.552  
7.544  
7.534

4.881

2.050  
2.045

ZD-787-2-acetone-H

Bruker Advance III 400

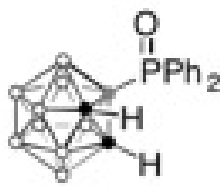

21a

```

NAME      ZD-787-2-acetone-H
EXPNO     1
PROCNO    1
Date_     20141016
Time      14.58
INSTRUM   spect
PROBHD    5 mm PADUL 13C
PULPROG   zg
TD         65536
SOLVENT   Acetone
NS         8
DS         0
SWH       10000.000 Hz
FIDRES    0.152588 Hz
AQ        3.2768500 sec
RG         161
DW        50.000 usec
DE        6.50 usec
TE        673.2 K
D1        1.00000000 sec
TD0       1
  
```

```

----- CHANNEL f1 -----
NUC1      1H
P1        14.83 usec
PL1       0.00 dB
PL1W      8.31434441 W
SFO1      400.1318000 MHz
SI        65536
SF        400.1300056 MHz
WDW       EM
SSB       0
LB        0.30 Hz
GB        0
PC        1.00
  
```

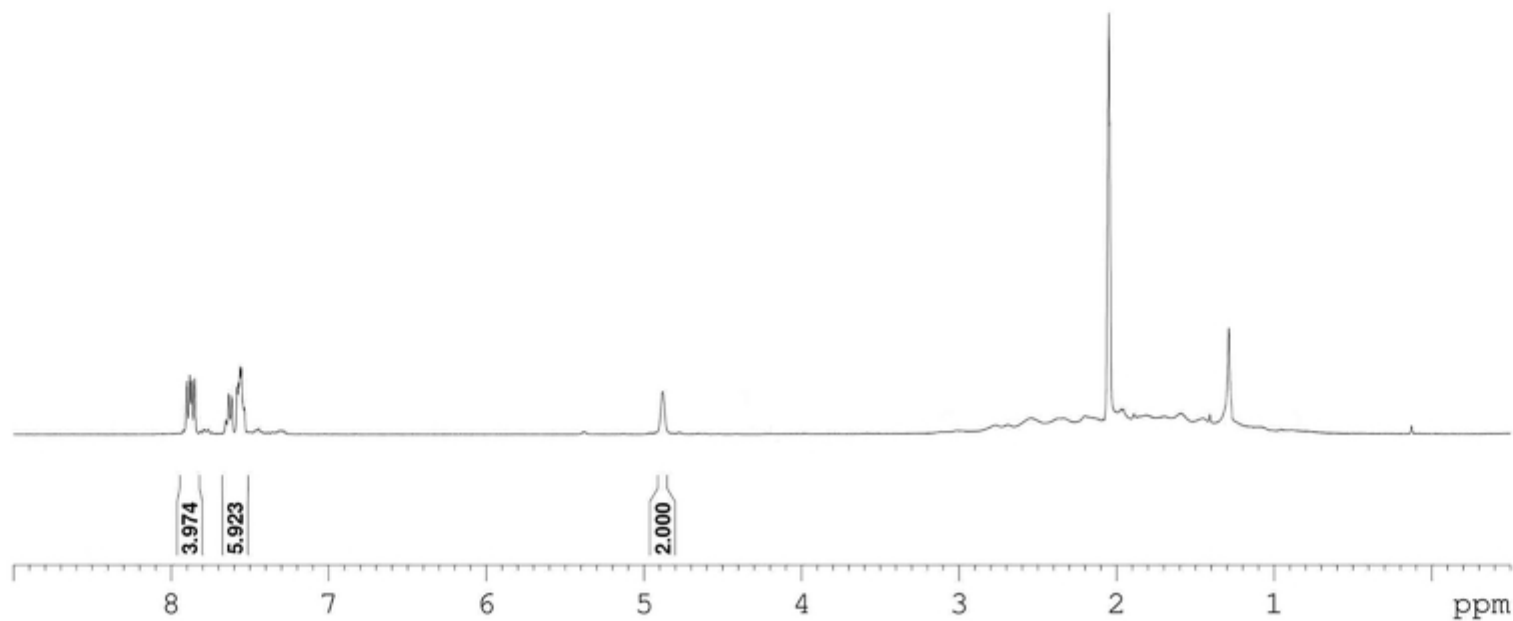

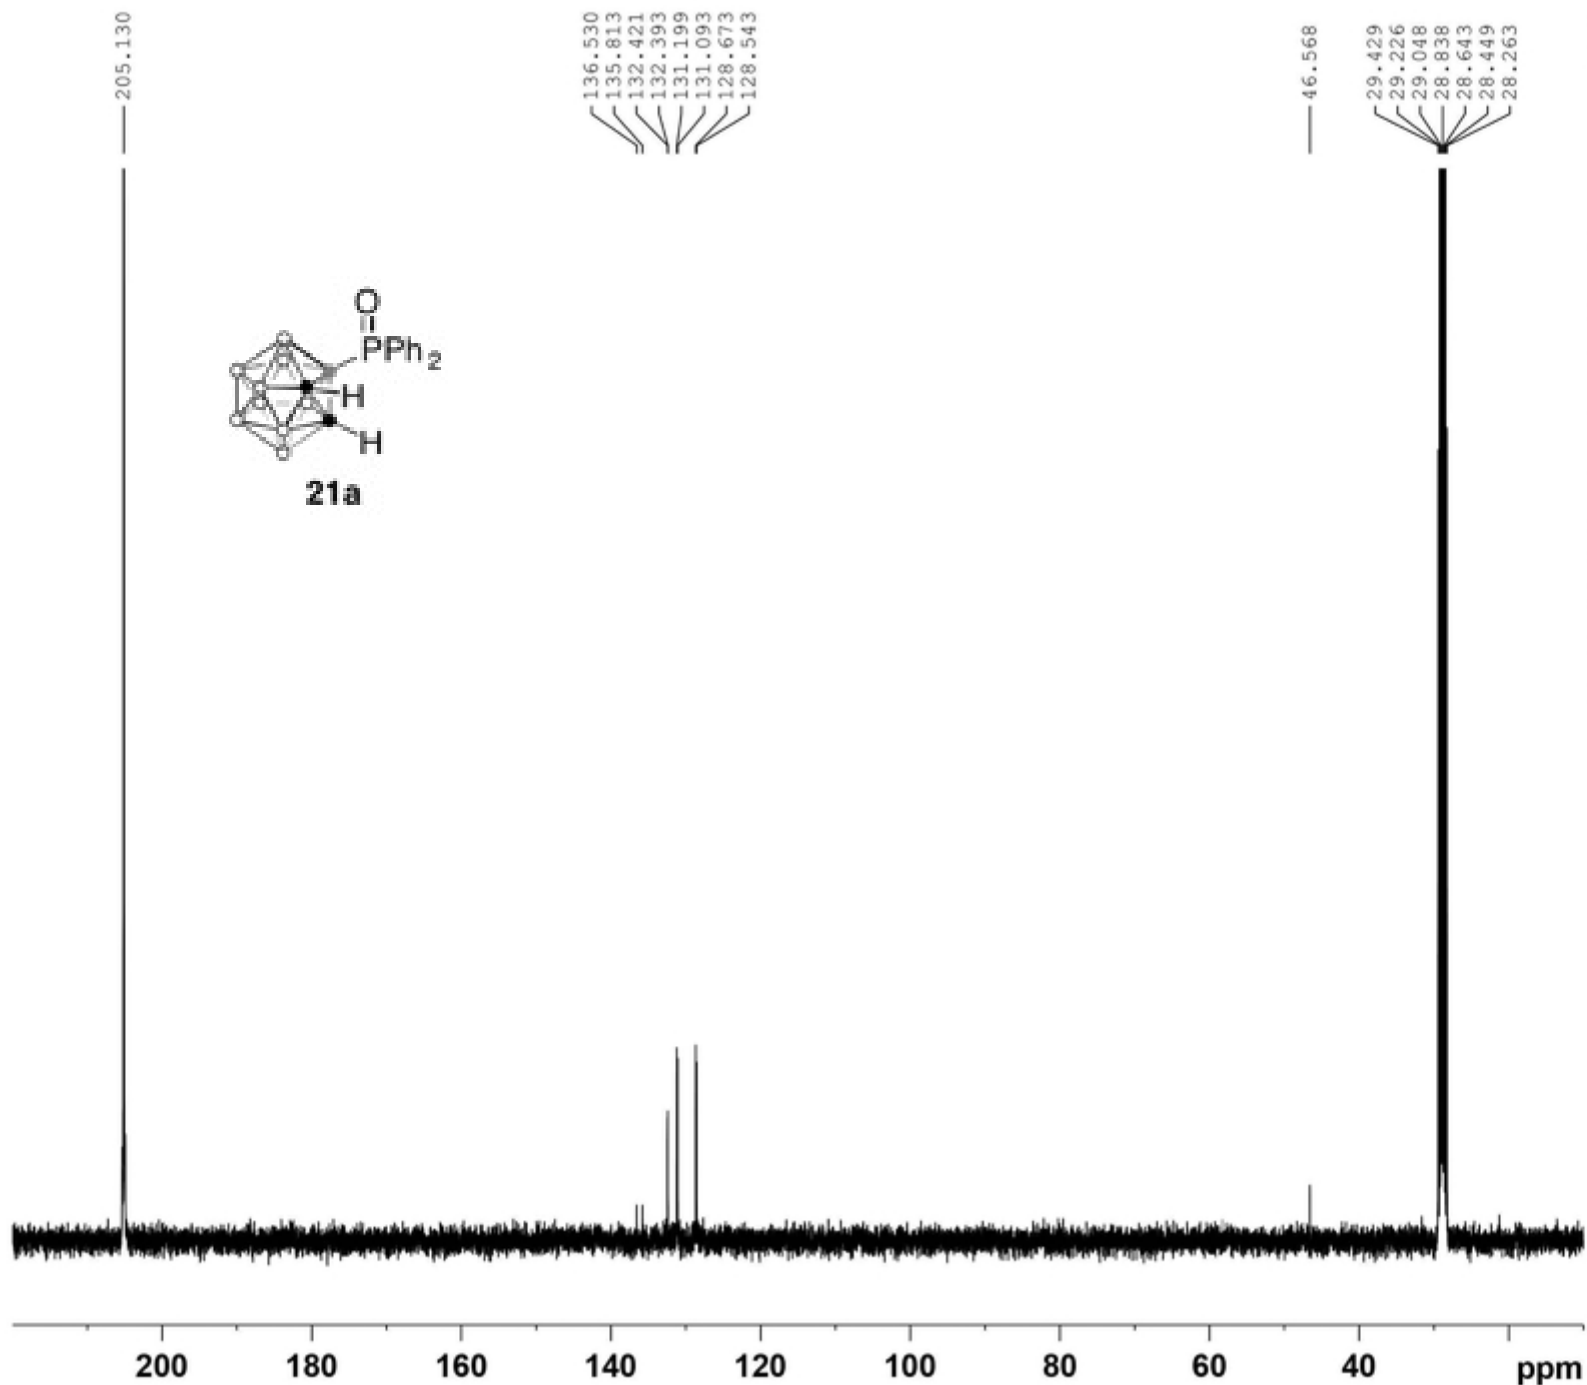

```

NAME      ZD-787-2-acetone-C
EXPNO     1
PROCNO    1
Date_     20141016
Time      15.01
INSTRUM   spect
PROBHD    5 mm PADUL 13C
PULPROG   zgdc
TD         131072
SOLVENT   Acetone
NS         1425
DS         0
SWH        29761.904 Hz
FIDRES     0.227065 Hz
AQ         2.2020595 sec
RG         203
DW         16.800 usec
DE         6.50 usec
TE         673.2 K
D1         1.00000000 sec
D11        0.03000000 sec
TDO       1

----- CHANNEL f1 -----
NUC1       13C
P1         9.68 usec
PL1        -0.60 dB
PL1W       41.24164963 W
SFO1       100.6227690 MHz

----- CHANNEL f2 -----
CPDPRG2   waltz16
NUC2       1H
PCPD2     90.00 usec
PL2        0.00 dB
PL12       15.66 dB
PL2W       8.31434441 W
PL12W      0.22585411 W
SFO2       400.1320007 MHz
SI         131072
SF         100.6127786 MHz
WDW        EM
SSB        0
LB         1.00 Hz
GB         0
PC         1.40

```

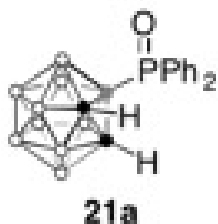

— -2.538  
 — -8.642  
 — -11.615  
 — -12.348  
 — -13.478

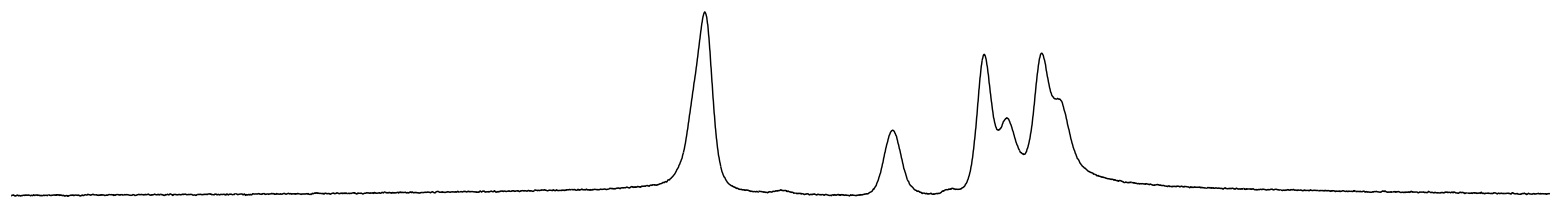

15      10      5      0      -5      -10      -15      -20      -25      ppm

3.04  
 1.12  
 1.74  
 0.92  
 3.17

```

NAME      ZD-787-2-acetone-B(de)
EXPNO     1
PROCNO    1
Date_     20141016
Time      14.33
INSTRUM   spect
PROBHD    5 mm PABBO BB-
PULPROG   zgdc
TD         65536
SOLVENT   CDCl3
NS         4
DS         0
SWH       25510.203 Hz
FIDRES    0.389255 Hz
AQ         1.2845556 sec
RG         287
DW         19.600 usec
DE         6.50 usec
TE         295.8 K
D1         5.00000000 sec
D11        0.03000000 sec
TD0        1
  
```

```

===== CHANNEL f1 =====
NUC1      11B
P1         7.60 usec
PL1       -3.00 dB
PL1W      55.13059616 W
SFO1      128.3968556 MHz
  
```

```

===== CHANNEL f2 =====
CPDPRG2   waltz16
NUC2      1H
PCPD2     90.00 usec
PL2       -1.00 dB
PL12      15.16 dB
PL2W      13.56617069 W
PL12W     0.32844096 W
SFO2      400.1916008 MHz
SI         32768
SF         128.3965728 MHz
WDW       EM
SSB        0
LB         3.00 Hz
GB         0
PC         1.40
  
```

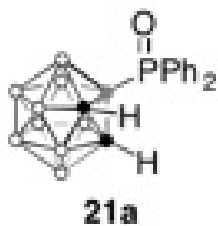

— -2.132  
 — -3.205  
  
 — -8.050  
 — -9.264  
 — -11.017  
 — -12.305  
 — -12.912  
 — -14.103

```

NAME      ZD-787-2-acetone-B(c)
EXPNO     1
PROCNO    1
Date_     20141016
Time      14.38
INSTRUM   spect
PROBHD    5 mm PABBO BB-
PULPROG   zg30
TD        65536
SOLVENT   CDCl3
NS        8
DS        0
SWH       25510.203 Hz
FIDRES    0.389255 Hz
AQ        1.2845556 sec
RG        161
DW        19.600 usec
DE        6.50 usec
TE        295.5 K
D1        5.00000000 sec
TDO       1
  
```

```

===== CHANNEL f1 =====
NUC1      11B
P1        7.60 usec
PL1       -3.00 dB
PL1W      55.13059616 W
SFO1      128.3968556 MHz
SI        32768
SF        128.3965775 MHz
WDW       EM
SSB       0
LB        3.00 Hz
GB        0
PC        1.40
  
```

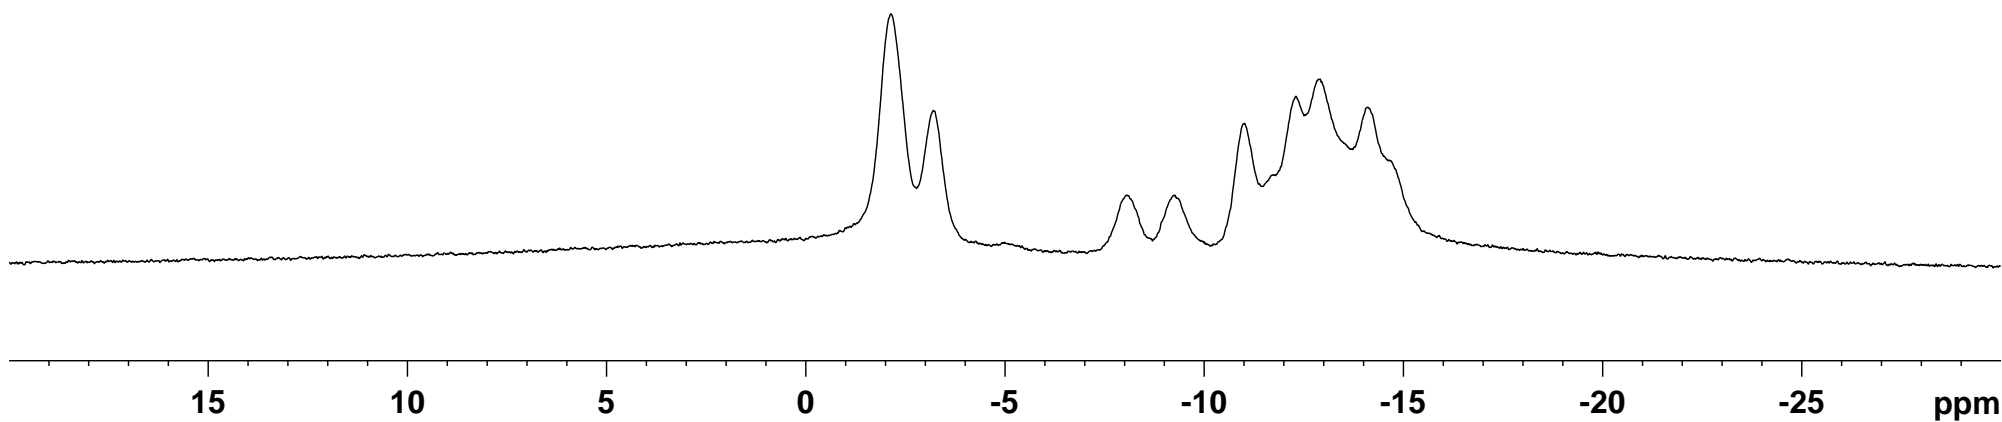



— 28.97

ZD-787-2-Acetone-P

```

NAME      ZD-787-2-Acetone-P
EXPNO     1
PROCNO    1
Date_     20141016
Time      14.27
INSTRUM   spect
PROBHD    5 mm PABBO BB-
PULPROG   zg30
TD         65536
SOLVENT   Acetone
NS         72
DS         4
SWH        64102.563 Hz
FIDRES     0.978127 Hz
AQ         0.5112308 sec
RG         2050
DW         7.800 usec
DE         6.50 usec
TE         298.0 K
D1         2.00000000 sec
TD0        1
  
```

```

===== CHANNEL f1 =====
NUC1      31P
P1        14.70 usec
PL1       4.00 dB
PL1W      10.30000019 W
SFO1      161.9917814 MHz
SI         32768
SF        161.9998472 MHz
WDW       EM
SSB       0
LB        1.00 Hz
GB        0
PC        1.40
  
```

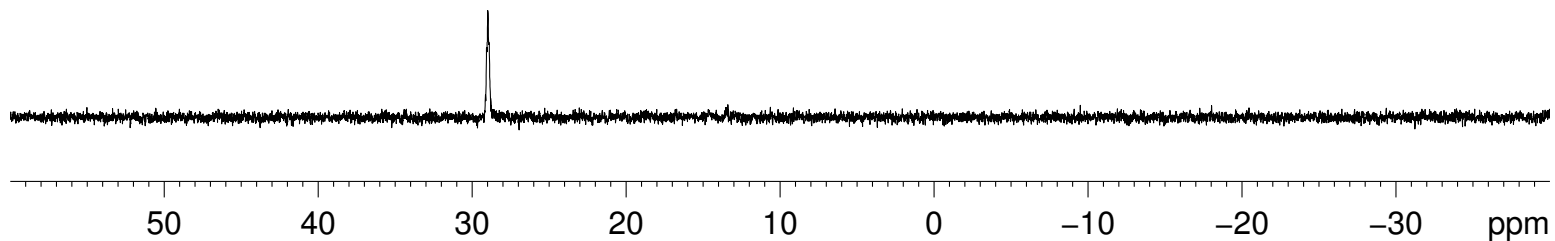



7.697  
7.676  
7.660  
7.640  
7.466  
7.454  
7.322

5.320

3.725

2.479

ZD-792-CD2Cl2-H

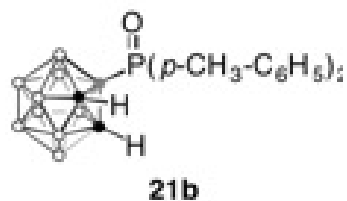

NAME ZD-792-CD2Cl2-H  
EXPNO 1  
PROCNO 1  
Date\_ 20141020  
Time 16.51  
INSTRUM spect  
PROBHD 5 mm PABBO BB-  
PULPROG zg30  
TD 65536  
SOLVENT CD2Cl2  
NS 8  
DS 2  
SWH 8223.685 Hz  
FIDRES 0.125483 Hz  
AQ 3.9846387 sec  
RG 50.8  
DW 60.800 usec  
DE 6.50 usec  
TE 298.0 K  
D1 1.0000000 sec  
TD0 1

===== CHANNEL f1 =====  
NUC1 1H  
P1 14.00 usec  
PL1 -1.00 dB  
PL1W 13.56617069 W  
SFO1 400.1924713 MHz  
SI 32768  
SF 400.1900207 MHz  
WDW EM  
SSB 0  
LB 0.30 Hz  
GB 0  
PC 1.00

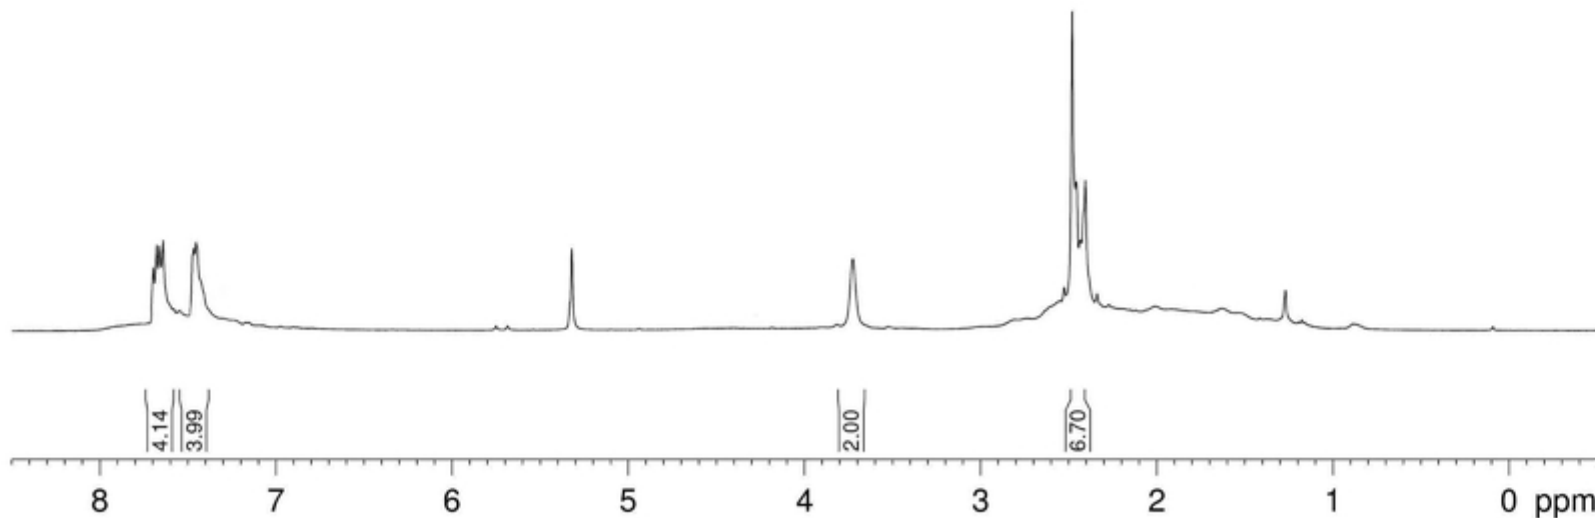

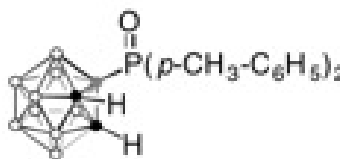

21b

147.254  
146.523

132.580  
132.422  
130.960  
130.783  
130.526  
130.170

57.116  
54.381  
54.107  
53.838  
53.571  
53.300

22.100  
21.892

```

NAME      ED-792-CD2C12-C
EXPNO     1
PROCNO    1
Date_     20141020
Time      16.54
INSTRUM   spect
PROBHD    5 mm PABBO BB-
PULPROG   zgpg30
TD         65536
SOLVENT   CD2C12
NS         200
DS         4
SWH        24038.461 Hz
FIDRES     0.366798 Hz
AQ         1.3631988 sec
RG         322
DW         20.800 usec
DE         6.50 usec
TE         298.5 K
D1         2.00000000 sec
D11        0.03000000 sec
TD0        1
  
```

```

===== CHANNEL f1 =====
NUC1      13C
P1         9.90 usec
PL1        -2.00 dB
PL1W      55.33689499 W
SFO1      100.6379183 MHz
  
```

```

===== CHANNEL f2 =====
CPDPRG2   waltz16
NUC2       1H
PCPD2     90.00 usec
PL2        -1.00 dB
PL12       15.16 dB
PL13       18.62 dB
PL2W      13.56617069 W
PL12W     0.32844096 W
PL13W     0.14806664 W
SFO2      400.1916008 MHz
SI         32768
SF         100.6278162 MHz
WDW        EM
SSB         0
LB          1.00 Hz
GB          0
PC          1.40
  
```

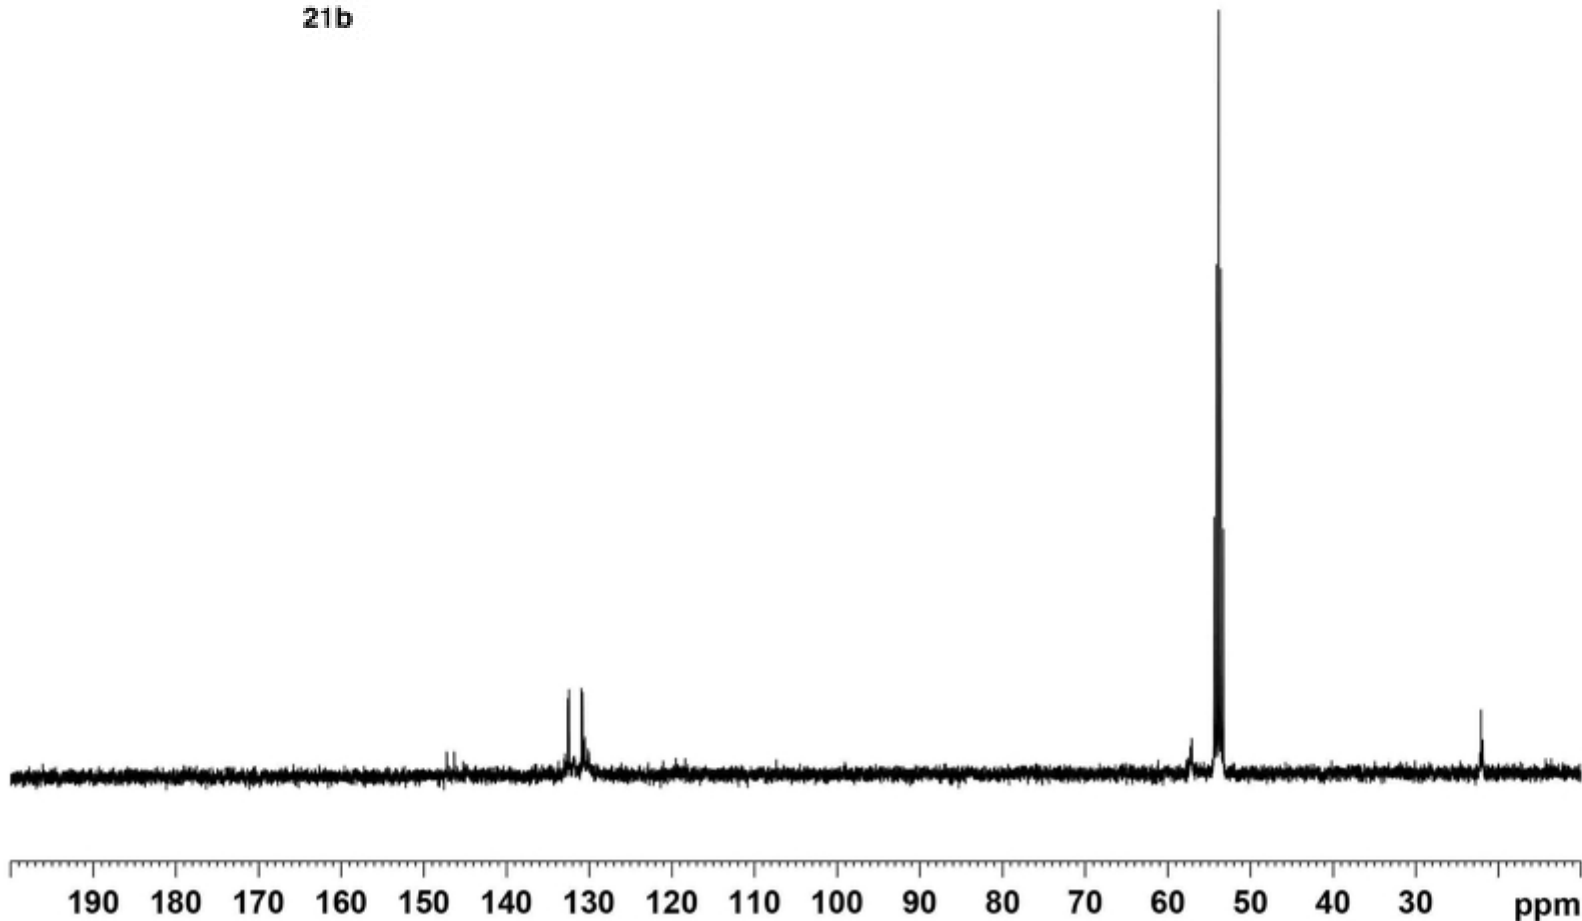

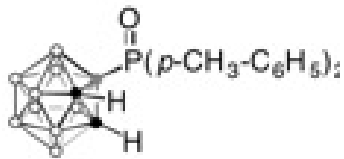

21b

— -2.229  
 — -8.334  
 — -11.307  
 — -12.040  
 — -13.170

```

NAME      ZD-792-CD2Cl2-B(de)
EXPNO     1
PROCNO    1
Date_     20141020
Time      16.17
INSTRUM   spect
PROBHD    5 mm PABBO BB-
PULPROG   zgdc
TD        65536
SOLVENT   CDCl3
NS        4
DS        0
SWH       25510.203 Hz
FIDRES    0.389255 Hz
AQ        1.2845556 sec
RG        287
DW        19.600 usec
DE        6.50 usec
TE        295.8 K
D1        5.00000000 sec
D11       0.03000000 sec
TD0       1
  
```

```

===== CHANNEL f1 =====
NUC1      11B
P1        7.60 usec
PL1       -3.00 dB
PL1W      55.13059616 W
SFO1      128.3968556 MHz
  
```

```

===== CHANNEL f2 =====
CPDPRG2   waltz16
NUC2      1H
PCPD2     90.00 usec
PL2       -1.00 dB
PL12      15.16 dB
PL2W      13.56617069 W
PL12W     0.32844096 W
SFO2      400.1916008 MHz
SI        32768
SF        128.3965333 MHz
WDW       EM
SSB       0
LB        3.00 Hz
GB        0
PC        1.40
  
```

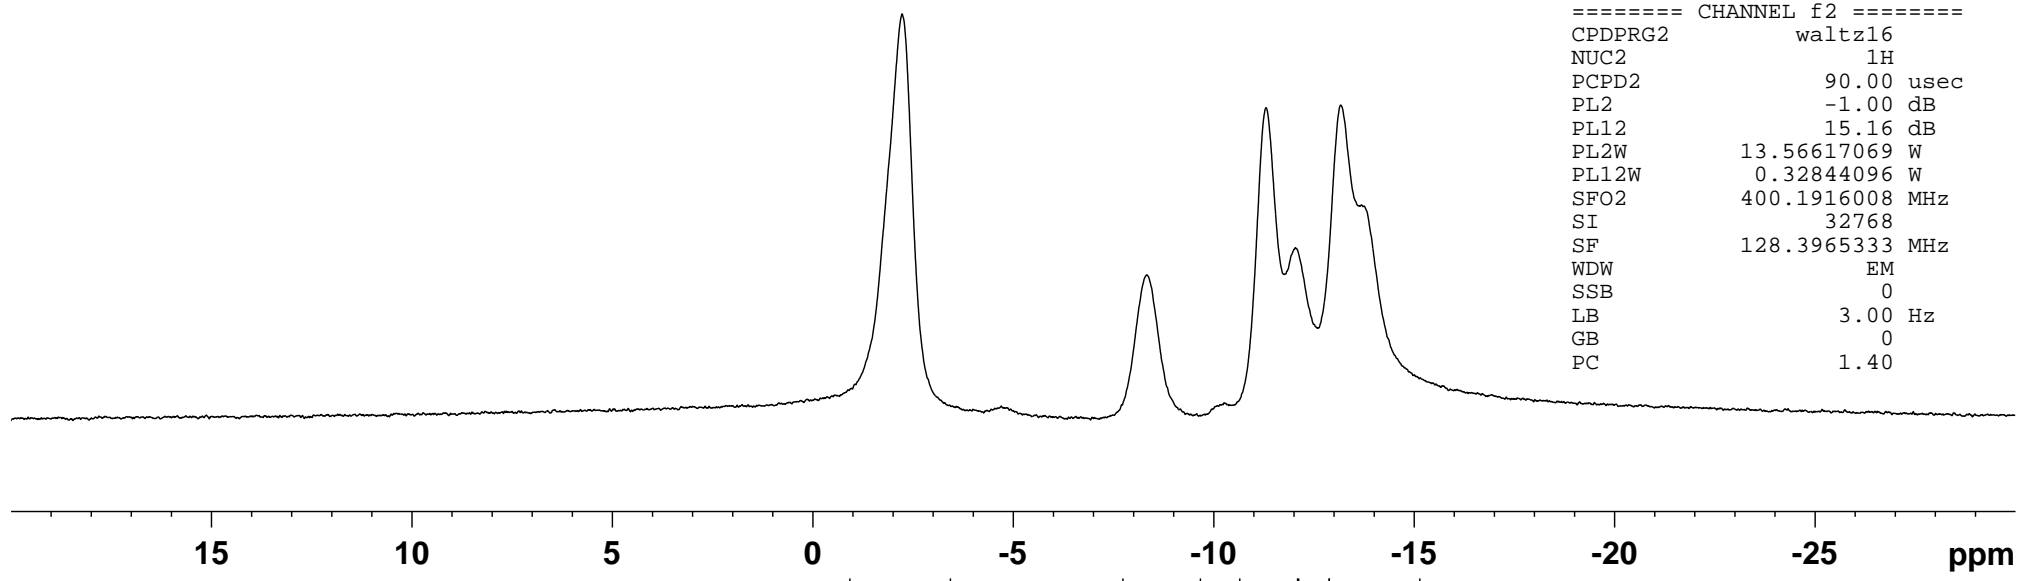

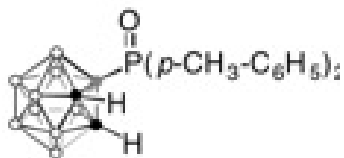

21b

— -1.765  
 — -2.838  
 — -7.683  
 — -8.897  
 — -10.650  
 — -11.938  
 — -12.545  
 — -13.736

```

NAME      ZD-792-CD2Cl2-B(c)
EXPNO     1
PROCNO    1
Date_     20141020
Time      16.21
INSTRUM   spect
PROBHD    5 mm PABBO BB-
PULPROG   zg30
TD        65536
SOLVENT   CDCl3
NS        8
DS        0
SWH       25510.203 Hz
FIDRES    0.389255 Hz
AQ        1.2845556 sec
RG        161
DW        19.600 usec
DE        6.50 usec
TE        295.5 K
D1        5.0000000 sec
TD0       1
  
```

```

===== CHANNEL f1 =====
NUC1      11B
P1        7.60 usec
PL1       -3.00 dB
PL1W      55.13059616 W
SFO1      128.3968556 MHz
SI        32768
SF        128.3965304 MHz
WDW       EM
SSB       0
LB        3.00 Hz
GB        0
PC        1.40
  
```

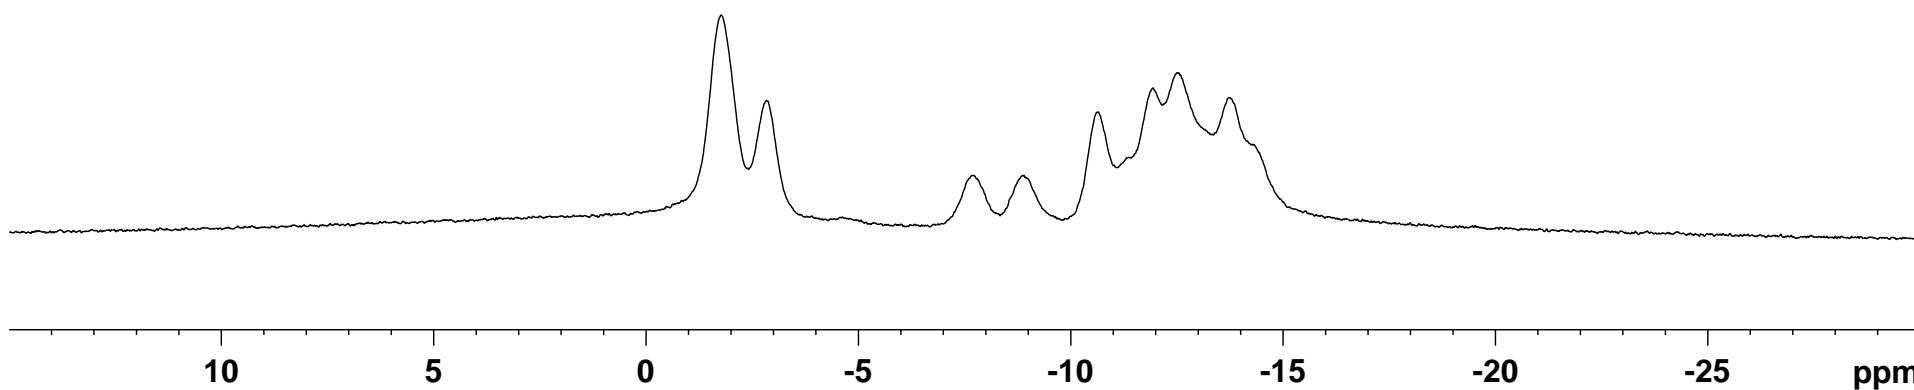

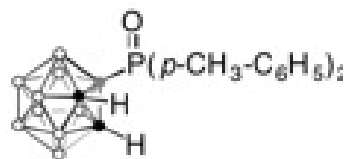

21b

33.91

ZD-792-CD2Cl2-P

```

NAME      ZD-792-CD2Cl2-P
EXPNO     1
PROCNO    1
Date_     20141020
Time      17.10
INSTRUM   spect
PROBHD    5 mm PABBO BB-
PULPROG   zg30
TD         65536
SOLVENT   CD2Cl2
NS         40
DS         4
SWH        64102.563 Hz
FIDRES     0.978127 Hz
AQ         0.5112308 sec
RG         2050
DW         7.800 usec
DE         6.50 usec
TE         298.5 K
D1         2.00000000 sec
TDO        1
  
```

```

===== CHANNEL f1 =====
NUC1      31P
P1        14.70 usec
PL1       4.00 dB
PL1W      10.30000019 W
SF01      161.9917814 MHz
SI        32768
SF        161.9998472 MHz
WDW       EM
SSB       0
LB        1.00 Hz
GB        0
PC        1.40
  
```

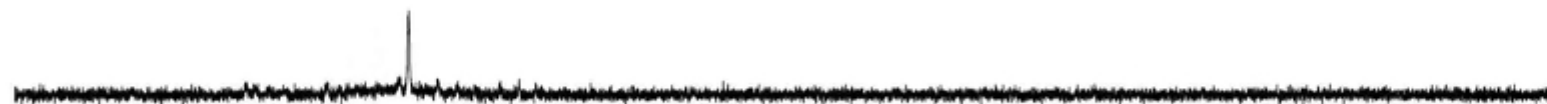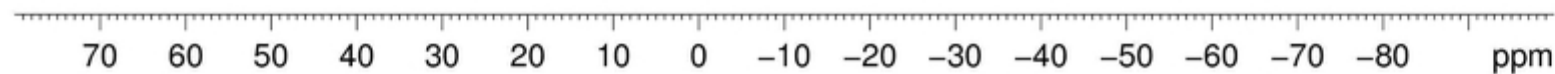

Supplement: SC-007-C6SC01566B-s001.pdf [file SC-007-C6SC01566B-s001.pdf]
